# Supplementary material
Source: publisher figshare collection journal article supplement (https://future-science-group.figshare.com/ndownloader/files/35127982)
Supplement: Supplementary file 1 [file 35127982]

## Sheet: Supplementary Data 1 high-confi
chr	start	end	width	annotaion	geneStart	geneEnd	geneLength	geneStrand	geneId
Chr1	1802807	1803106	300	Exon (NM_001134543.2/Lats1, exon 4 of 8)	1784078	1817310	33233	1	Lats1
Chr1	1803206	1803655	450	Exon (NM_001134543.2/Lats1, exon 4 of 8)	1784078	1817310	33233	1	Lats1
Chr1	1803904	1805332	1429	3' UTR	1784078	1817310	33233	1	Lats1
Chr1	1806504	1813918	7415	Exon (NM_001134543.2/Lats1, exon 5 of 8)	1784078	1817310	33233	1	Lats1
Chr1	1912815	1928480	15666	3' UTR	1897316	1929738	32423	1	Ppil4
Chr1	5242332	5242582	251	5' UTR	5240139	5313064	72926	1	Shprh
Chr1	5242882	5246075	3194	Exon (XM_006227639.2/Shprh, exon 2 of 30)	5240139	5313064	72926	1	Shprh
Chr1	5379676	5379973	298	Exon (XM_006227640.3/Fbxo30, exon 2 of 3)	5366119	5389774	23656	1	Fbxo30
Chr1	5381015	5387443	6429	3' UTR	5366119	5389774	23656	1	Fbxo30
Chr1	7102047	7102237	191	3' UTR	7101715	7102427	713	1	Sf3b5
Chr1	7257094	7257294	201	3' UTR	7219587	7270169	50583	1	Plagl1
Chr1	7659162	7665802	6641	Exon (NM_001004218.1/Fuca2, exon 1 of 7)	7658919	7673663	14745	1	Fuca2
Chr1	7672100	7673614	1515	3' UTR	7658919	7673663	14745	1	Fuca2
Chr1	8312645	8313195	551	Exon (NM_024137.1/Hivep2, exon 6 of 11)	8129354	8333890	204537	1	Hivep2
Chr1	8315592	8315792	201	Exon (NM_024137.1/Hivep2, exon 6 of 11)	8129354	8333890	204537	1	Hivep2
Chr1	8315892	8316042	151	Exon (NM_024137.1/Hivep2, exon 6 of 11)	8129354	8333890	204537	1	Hivep2
Chr1	8322098	8332342	10245	3' UTR	8129354	8333890	204537	1	Hivep2
Chr1	8333141	8333540	400	3' UTR	8129354	8333890	204537	1	Hivep2
Chr1	8944752	8944901	150	Exon (XM_017588815.1/Nmbr, exon 3 of 3)	8933744	8945850	12107	1	Nmbr
Chr1	8945001	8945201	201	3' UTR	8933744	8945850	12107	1	Nmbr
Chr1	12823461	12824478	1018	5' UTR	12823363	12825806	2444	1	Cited2
Chr1	12824576	12825511	936	3' UTR	12823363	12825806	2444	1	Cited2
Chr1	13295983	13298249	2267	3' UTR	13262049	13298347	36299	1	Reps1
Chr1	13696741	13696940	200	Exon (XM_017589823.1/Nhsl1, exon 6 of 8)	13472694	13705364	232671	1	Nhsl1
Chr1	13697639	13697789	151	Exon (XM_017589823.1/Nhsl1, exon 6 of 8)	13472694	13705364	232671	1	Nhsl1
Chr1	13697888	13698288	401	Exon (XM_017589823.1/Nhsl1, exon 6 of 8)	13472694	13705364	232671	1	Nhsl1
Chr1	13698587	13699336	750	Exon (XM_017589823.1/Nhsl1, exon 6 of 8)	13472694	13705364	232671	1	Nhsl1
Chr1	13704216	13704915	700	3' UTR	13472694	13705364	232671	1	Nhsl1
Chr1	13705065	13705264	200	3' UTR	13472694	13705364	232671	1	Nhsl1
Chr1	14798259	14798406	148	Exon (NM_001106269.1/Olig3, exon 1 of 1)	14797766	14799835	2070	1	Olig3
Chr1	15079000	15080815	1816	3' UTR	15062380	15080815	18436	1	Ifngr1
Chr1	15642331	15716599	74269	Exon (NM_001198638.1/Map7, exon 2 of 16)	15620665	15748196	127532	1	Map7
Chr1	15737060	15747115	10056	3' UTR	15620665	15748196	127532	1	Map7
Chr1	15747214	15747362	149	3' UTR	15620665	15748196	127532	1	Map7
Chr1	15810629	15810779	151	Exon (XM_006227653.3/Bclaf1, exon 3 of 12)	15799753	15828838	29086	1	Bclaf1
Chr1	15811028	15813148	2121	Exon (XM_006227653.3/Bclaf1, exon 3 of 12)	15799753	15828838	29086	1	Bclaf1
Chr1	15819384	15826260	6877	Exon (XM_006227653.3/Bclaf1, exon 8 of 12)	15799753	15828838	29086	1	Bclaf1
Chr1	15849838	15849984	147	3' UTR	15834779	15850424	15646	1	Mtfr2
Chr1	16478177	16481568	3392	Exon (NM_001002277.1/Ahi1, exon 1 of 23)	16478127	16601769	123643	1	Ahi1
Chr1	16895690	16896185	496	3' UTR	16819170	16896221	77052	1	Hbs1l
Chr1	18985017	18986469	1453	Exon (XM_017590488.1/Lama2, exon 36 of 65)	18491264	19143486	652223	1	Lama2
Chr1	19140374	19143336	2963	3' UTR	18491264	19143486	652223	1	Lama2
Chr1	20090469	20092902	2434	Exon (XM_006227696.3/L3mbtl3, exon 19 of 22)	19998776	20097298	98523	1	L3mbtl3
Chr1	20093512	20097099	3588	3' UTR	19998776	20097298	98523	1	L3mbtl3
Chr1	20410323	20410722	400	3' UTR	20330670	20413921	83252	1	Tmem200a
Chr1	21211527	21263850	52324	Exon (NM_001001801.3/Akap7, exon 8 of 9)	21129213	21263850	134638	1	Akap7
Chr1	21525518	21530448	4931	5' UTR	21525421	21537872	12452	1	Arg1
Chr1	21536950	21537629	680	3' UTR	21525421	21537872	12452	1	Arg1
Chr1	21812107	21812606	500	3' UTR	21748201	21813205	65005	1	Enpp1
Chr1	21812706	21813005	300	3' UTR	21748201	21813205	65005	1	Enpp1
Chr1	22286944	22287389	446	Exon (XR_001835561.1/LOC108349187, exon 2 of 2)	22281989	22288279	6291	1	LOC108349187
Chr1	23600042	23604612	4571	Exon (NM_001271317.1/Eya4, exon 16 of 20)	23237617	23611580	373964	1	Eya4
Chr1	23610086	23610633	548	3' UTR	23237617	23611580	373964	1	Eya4
Chr1	23998512	24002365	3854	3' UTR	23977154	24002512	25359	1	Tbpl1
Chr1	25173485	25216190	42706	5' UTR	25173089	25217625	44537	1	Clvs2
Chr1	28159149	28160038	890	3' UTR	27473251	28161521	688271	1	LOC102551716
Chr1	28386898	28391434	4537	3' UTR	28301960	28391582	89623	1	Rnf217
Chr1	28576254	28576403	150	3' UTR	28567447	28600116	32670	2	Hddc2
Chr1	29191269	29200961	9693	3' UTR	29191170	29201257	10088	1	Hey2
Chr1	29327172	29374471	47300	5' UTR	29348235	29353511	5277	2	LOC108348877
Chr1	29375862	29385051	9190	5' UTR	29225727	29386642	160916	1	Ncoa7
Chr1	29385797	29386244	448	3' UTR	29225727	29386642	160916	1	Ncoa7
Chr1	29575780	29576029	250	3' UTR	29432109	29576079	143971	1	Trmt11
Chr1	30713363	30766447	53085	3' UTR	30681648	30768038	86391	1	Rspo3
Chr1	30857743	30873366	15624	5' UTR	30863217	30873814	10598	1	Rnf146
Chr1	31494142	31511672	17531	5' UTR	31494222	31519034	24813	1	LOC100911237
Chr1	31517502	31517996	495	Exon (XM_008758694.2/LOC100911237, exon 5 of 5)	31494043	31519034	24992	1	LOC100911237
Chr1	31518540	31518688	149	3' UTR	31494043	31519034	24992	1	LOC100911237
Chr1	31535165	31535314	150	3' UTR	31531143	31535314	4172	1	Lrrc14b
Chr1	31591555	31591753	199	3' UTR	31576183	31591849	15667	1	Pdcd6
Chr1	31702610	31717762	15153	Exon (NM_001024964.1/Exoc3, exon 2 of 13)	31700953	31731700	30748	1	Exoc3
Chr1	31986267	31986565	299	3' UTR	31967980	31987007	19028	1	Trip13
Chr1	32080706	32083219	2514	3' UTR	32054390	32085416	31027	1	Nkd2
Chr1	32083419	32084817	1399	3' UTR	32054390	32085416	31027	1	Nkd2
Chr1	33281176	33281424	249	Exon (XR_589903.1/LOC103690947, exon 2 of 2)	33277555	33281870	4316	1	LOC103690947
Chr1	33914569	33915068	500	Exon (NM_001107331.1/Irx1, exon 2 of 4)	33910912	33916741	5830	1	Irx1
Chr1	35302210	35302410	201	Exon (XM_225143.7/Ice1, exon 13 of 19)	35280481	35322769	42289	1	Ice1
Chr1	35302709	35303309	601	Exon (XM_225143.7/Ice1, exon 13 of 19)	35280481	35322769	42289	1	Ice1
Chr1	35303609	35303758	150	Exon (XM_225143.7/Ice1, exon 13 of 19)	35280481	35322769	42289	1	Ice1
Chr1	35304058	35305357	1300	Exon (XM_225143.7/Ice1, exon 13 of 19)	35280481	35322769	42289	1	Ice1
Chr1	35305457	35306456	1000	Exon (XM_225143.7/Ice1, exon 13 of 19)	35280481	35322769	42289	1	Ice1
Chr1	35313765	35319272	5508	3' UTR	35280481	35322769	42289	1	Ice1
Chr1	35319522	35319722	201	3' UTR	35280481	35322769	42289	1	Ice1
Chr1	36186996	36226227	39232	3' UTR	36185916	36226276	40361	1	Ube2ql1
Chr1	36353560	36354546	987	3' UTR	36320504	36354694	34191	1	Srd5a1
Chr1	36431092	36431392	301	3' UTR	36400056	36431254	31199	1	Papd7
Chr1	36431990	36432340	351	3' UTR	36400443	36433238	32796	1	Papd7
Chr1	36432440	36433088	649	3' UTR	36400443	36433238	32796	1	Papd7
Chr1	37697596	37698092	497	3' UTR	37043071	37698390	655320	1	Adcy2
Chr1	37744147	37745774	1628	5' UTR	37745697	37774485	28789	1	Mtrr
Chr1	37774088	37774336	249	3' UTR	37743089	37774485	31397	1	Mtrr
Chr1	39812159	39921332	109174	Exon (NM_133425.3/Ppp1r14c, exon 1 of 4)	39811314	39923071	111758	1	Ppp1r14c
Chr1	40426044	40434198	8155	5' UTR	40433990	40519148	85159	1	Plekhg1
Chr1	40510243	40510443	201	Exon (XM_017589700.1/Plekhg1, exon 16 of 17)	40286908	40521395	234488	1	Plekhg1
Chr1	40510542	40519153	8612	3' UTR	40286908	40521395	234488	1	Plekhg1
Chr1	40718835	40719182	348	3' UTR	40529092	40719232	190141	1	Mthfd1l
Chr1	40899278	40905934	6657	3' UTR	40816130	40906582	90453	1	Akap12
Chr1	41004927	41005076	150	Exon (XM_017588870.1/Armt1, exon 4 of 4)	40982761	41006371	23611	1	Armt1
Chr1	41005923	41006271	349	3' UTR	40982761	41006371	23611	1	Armt1
Chr1	44112155	44113767	1613	Exon (XM_006227858.3/Scaf8, exon 17 of 21)	44017801	44120619	102819	1	Scaf8
Chr1	44117550	44120469	2920	3' UTR	44017801	44120619	102819	1	Scaf8
Chr1	44432401	44433450	1050	3' UTR	44433116	44474674	41559	2	Tfb1m
Chr1	44444059	44446111	2053	5' UTR	44443218	44447595	4378	1	Cldn20
Chr1	44447150	44447447	298	3' UTR	44443218	44447595	4378	1	Cldn20
Chr1	46216873	46226077	9205	Exon (XM_017590420.1/Arid1b, exon 15 of 21)	45923119	46232301	309183	1	Arid1b
Chr1	46228188	46232301	4114	3' UTR	45923119	46232301	309183	1	Arid1b
Chr1	46618209	46649197	30989	3' UTR	46378807	46649293	270487	1	Zdhhc14
Chr1	46658279	46658527	249	3' UTR	46378822	46658525	279704	1	Zdhhc14
Chr1	46923617	46930443	6827	Exon (NM_032071.2/Synj2, exon 25 of 29)	46835922	46932544	96623	1	Synj2
Chr1	46931601	46932544	944	3' UTR	46835922	46932544	96623	1	Synj2
Chr1	46983616	46984202	587	3' UTR	46978345	46984226	5882	1	Gtf2h5
Chr1	47030749	47032444	1696	5' UTR	47032312	47126837	94526	1	Tulp4
Chr1	47122413	47127166	4754	3' UTR	47002928	47128114	125187	1	Tulp4
Chr1	47685326	47687300	1975	3' UTR	47605211	47687499	82289	1	Fndc1
Chr1	47949975	47959543	9569	3' UTR	47942500	47959697	17198	1	Wtap
Chr1	47964671	47967386	2716	3' UTR	47942500	47967633	25134	1	Wtap
Chr1	48260842	48263537	2696	3' UTR	48176095	48264482	88388	1	Igf2r
Chr1	48520114	48520413	300	3' UTR	48433079	48521261	88183	1	Slc22a3
Chr1	48520762	48521012	251	3' UTR	48433079	48521261	88183	1	Slc22a3
Chr1	48661541	48669978	8438	5' UTR	48625714	48711642	85929	1	Map3k4
Chr1	48705845	48711393	5549	3' UTR	48625714	48711642	85929	1	Map3k4
Chr1	48773197	48783902	10706	Exon (XR_001835612.1/LOC108349099, exon 1 of 2)	48716094	48798471	82378	2	Agpat4
Chr1	50491026	50491175	150	3' UTR	50070273	50491323	421051	1	Pacrg
Chr1	53493241	53498051	4811	3' UTR	53219346	53499445	280100	1	Rps6ka2
Chr1	56373319	56374008	690	3' UTR	56242289	56374106	131818	1	Smoc2
Chr1	56950044	56950891	848	5' UTR	56949712	56952434	2723	1	LOC100125364
Chr1	57001492	57001641	150	Exon (XM_002728660.5/Ermard, exon 18 of 18)	56982742	57008076	25335	1	Ermard
Chr1	57001841	57002489	649	3' UTR	56982742	57008076	25335	1	Ermard
Chr1	57350089	57357186	7098	5' UTR	57357172	57392114	34943	1	Fam120b
Chr1	57389883	57390832	950	3' UTR	57345559	57392114	46556	1	Fam120b
Chr1	57508839	57508988	150	3' UTR	57491381	57509335	17955	1	Tbp
Chr1	57559893	57560141	249	Exon (XR_001835623.1/LOC102551889, exon 2 of 3)	57555215	57564878	9664	1	LOC102551889
Chr1	57561282	57561481	200	Exon (XR_001835623.1/LOC102551889, exon 2 of 3)	57555215	57564878	9664	1	LOC102551889
Chr1	57564867	57565115	249	Exon (XR_001835623.1/LOC102551889, exon 3 of 3)	57555215	57564878	9664	1	LOC102551889
Chr1	57731257	57733266	2010	Exon (NM_001107465.1/Chd1, exon 21 of 34)	57692828	57756762	63935	1	Chd1
Chr1	57751534	57756063	4530	3' UTR	57692828	57756762	63935	1	Chd1
Chr1	59140273	59140571	299	Exon (NM_001009687.1/Riok2, exon 8 of 10)	59130008	59146457	16450	1	Riok2
Chr1	59209753	59212780	3028	3' UTR	59156021	59212878	56858	1	Lix1
Chr1	59701277	59703404	2128	5' UTR	59703354	59716513	13160	1	LOC688452
Chr1	60890912	60891061	150	Exon (XM_006227996.3/LOC100365363, exon 5 of 5)	60871747	60892854	21108	1	LOC100365363
Chr1	60891260	60891559	300	Exon (XM_006227996.3/LOC100365363, exon 5 of 5)	60871747	60892854	21108	1	LOC100365363
Chr1	60891758	60892854	1097	3' UTR	60871747	60892854	21108	1	LOC100365363
Chr1	61258823	61259022	200	5' UTR	61257925	61278666	20742	1	LOC102552527
Chr1	61275075	61276222	1148	Exon (XM_006228079.3/LOC102552527, exon 5 of 5)	61257925	61278666	20742	1	LOC102552527
Chr1	61276322	61276970	649	3' UTR	61257925	61278666	20742	1	LOC102552527
Chr1	61278267	61278516	250	3' UTR	61257925	61278666	20742	1	LOC102552527
Chr1	61325212	61325759	548	Exon (XM_006228023.3/Zfp51, exon 4 of 4)	61286077	61326273	40197	1	Zfp51
Chr1	61374702	61375048	347	Exon (XM_008758763.2/Zfp53, exon 5 of 5)	61348278	61376375	28098	1	Zfp53
Chr1	61375791	61375989	199	Exon (XM_008758763.2/Zfp53, exon 5 of 5)	61348278	61376375	28098	1	Zfp53
Chr1	61424442	61424641	200	Exon (XM_017589343.1/Zfp52, exon 6 of 6)	61389594	61426289	36696	1	Zfp52
Chr1	61425434	61426178	745	3' UTR	61389594	61426289	36696	1	Zfp52
Chr1	61454819	61456456	1638	Exon (XM_017589905.1/LOC102550851, exon 4 of 4)	61434165	61456654	22490	1	LOC102550851
Chr1	61508802	61509002	201	Exon (XM_006228004.3/LOC108348215, exon 5 of 5)	61487502	61509202	21701	1	LOC108348215
Chr1	61528799	61531526	2728	Exon (XM_006228010.3/Znf761, exon 4 of 5)	61518756	61533674	14919	1	Znf761
Chr1	61531975	61532325	351	Exon (XM_006228010.3/Znf761, exon 5 of 5)	61518756	61533674	14919	1	Znf761
Chr1	61532425	61533074	650	3' UTR	61518756	61533674	14919	1	Znf761
Chr1	61716488	61717037	550	Exon (XM_017589913.1/LOC102553001, exon 7 of 7)	61699239	61719033	19795	1	LOC102553001
Chr1	61717137	61717586	450	3' UTR	61699239	61719033	19795	1	LOC102553001
Chr1	61718684	61718933	250	3' UTR	61699239	61719033	19795	1	LOC102553001
Chr1	61724540	61726534	1995	5' UTR	61724092	61741787	17696	1	LOC682206
Chr1	61738302	61739098	797	Exon (XM_008758828.2/LOC682206, exon 5 of 6)	61724092	61741787	17696	1	LOC682206
Chr1	61739198	61740592	1395	3' UTR	61724092	61741787	17696	1	LOC682206
Chr1	61740692	61741638	947	3' UTR	61724092	61741787	17696	1	LOC682206
Chr1	63834347	63834644	298	Exon (XM_008758873.1/LOC683420, exon 4 of 4)	63813161	63836330	23170	1	LOC683420
Chr1	64126982	64130717	3736	Exon (NM_001106218.1/Leng1, exon 1 of 4)	64126882	64131814	4933	1	Leng1
Chr1	64130867	64131315	449	3' UTR	64130823	64147066	16244	2	Cnot3
Chr1	64131465	64131764	300	3' UTR	64130823	64147066	16244	2	Cnot3
Chr1	64163353	64172259	8907	Exon (XM_006228037.3/Tfpt, exon 2 of 6)	64162525	64172305	9781	1	Tfpt
Chr1	64353531	64353829	299	Exon (XR_001835640.1/LOC103691003, exon 1 of 4)	64353332	64394568	41237	1	LOC103691003
Chr1	64353929	64354361	433	Exon (XR_001835640.1/LOC103691003, exon 1 of 4)	64354259	64394568	40310	1	LOC103691003
Chr1	64745833	64747896	2064	5' UTR	64721939	64749676	27738	1	LOC103691005
Chr1	64748687	64748835	149	Exon (XM_017589927.1/LOC103691005, exon 4 of 4)	64721939	64749676	27738	1	LOC103691005
Chr1	64748934	64749330	397	Exon (XM_017589927.1/LOC103691005, exon 4 of 4)	64721939	64749676	27738	1	LOC103691005
Chr1	64749429	64749577	149	3' UTR	64721939	64749676	27738	1	LOC103691005
Chr1	65521025	65522151	1127	5' UTR	65522118	65533212	11095	1	Mzf1
Chr1	65532638	65533183	546	3' UTR	65520830	65533233	12404	1	Mzf1
Chr1	65537738	65538081	344	5' UTR	65537640	65541177	3538	1	Ube2m
Chr1	65541293	65542034	742	5' UTR	65541322	65543707	2386	1	Chmp2a
Chr1	65543392	65543660	269	3' UTR	65540808	65543708	2901	1	Chmp2a
Chr1	65564246	65565680	1435	5' UTR	65563999	65568301	4303	1	Zbtb45
Chr1	65565779	65566125	347	Exon (XM_006228114.3/Zbtb45, exon 2 of 3)	65563999	65568301	4303	1	Zbtb45
Chr1	65566866	65568202	1337	3' UTR	65567864	65570607	2744	2	LOC108348450
Chr1	65602770	65603112	343	Exon (XR_590024.2/LOC102552250, exon 2 of 2)	65602266	65604336	2071	1	LOC102552250
Chr1	65603553	65603847	295	Exon (XR_590024.2/LOC102552250, exon 2 of 2)	65602266	65604336	2071	1	LOC102552250
Chr1	65792038	65792485	448	Exon (NM_001107477.2/Zfp329, exon 2 of 2)	65781547	65800492	18946	1	Zfp329
Chr1	65792635	65793032	398	Exon (NM_001107477.2/Zfp329, exon 2 of 2)	65781547	65800492	18946	1	Zfp329
Chr1	65793231	65793381	151	Exon (NM_001107477.2/Zfp329, exon 2 of 2)	65781547	65800492	18946	1	Zfp329
Chr1	65799149	65799398	250	3' UTR	65781547	65800492	18946	1	Zfp329
Chr1	65851587	65851836	250	Exon (XM_008758843.2/Zscan18, exon 2 of 7)	65845274	65858966	13693	1	Zscan18
Chr1	65855250	65858018	2769	3' UTR	65845274	65858966	13693	1	Zscan18
Chr1	66900918	66901463	546	Exon (XM_017589943.1/Zfp551, exon 4 of 4)	66894836	66904342	9507	1	Zfp551
Chr1	66901958	66902156	199	Exon (XM_017589943.1/Zfp551, exon 4 of 4)	66894836	66904342	9507	1	Zfp551
Chr1	69626310	69626609	300	Exon (XM_006228177.3/Zfp418, exon 3 of 3)	69615413	69629997	14585	1	Zfp418
Chr1	69629050	69629250	201	3' UTR	69615413	69629997	14585	1	Zfp418
Chr1	69681866	69683014	1149	Exon (XM_008759083.2/LOC691135, exon 4 of 5)	69672957	69684113	11157	1	LOC691135
Chr1	69683363	69683913	551	Exon (XM_008759083.2/LOC691135, exon 4 of 5)	69672957	69684113	11157	1	LOC691135
Chr1	69841870	69843027	1158	5' UTR	69841771	69848181	6411	1	Zfp773-ps1
Chr1	69845410	69845558	149	Exon (XM_017589950.1/Zfp773-ps1, exon 4 of 4)	69841771	69848181	6411	1	Zfp773-ps1
Chr1	69845806	69846350	545	3' UTR	69841771	69848181	6411	1	Zfp773-ps1
Chr1	69857487	69859292	1806	3' UTR	69858801	69866439	7639	2	LOC102547517
Chr1	70231717	70234609	2893	3' UTR	70234160	70235091	932	2	Apeg3
Chr1	70236952	70237151	200	3' UTR	70210810	70237445	26636	1	Peg3
Chr1	70264272	70264421	150	Exon (XM_017589105.1/Zim1, exon 7 of 7)	70244828	70268289	23462	1	Zim1
Chr1	70265413	70265710	298	3' UTR	70244828	70268289	23462	1	Zim1
Chr1	70266256	70266454	199	3' UTR	70244828	70268289	23462	1	Zim1
Chr1	70268091	70268289	199	3' UTR	70244828	70268289	23462	1	Zim1
Chr1	71260747	71261143	397	Exon (XM_006228199.3/Zfp583, exon 5 of 5)	71243719	71262774	19056	1	Zfp583
Chr1	71261242	71261489	248	Exon (XM_006228199.3/Zfp583, exon 5 of 5)	71243719	71262774	19056	1	Zfp583
Chr1	71261588	71262082	495	Exon (XM_006228199.3/Zfp583, exon 5 of 5)	71243719	71262774	19056	1	Zfp583
Chr1	71304242	71304438	197	Exon (XR_590074.2/LOC102548473, exon 3 of 4)	71294027	71313805	19779	1	LOC102548473
Chr1	71313511	71313707	197	Exon (XR_590074.2/LOC102548473, exon 4 of 4)	71294027	71313805	19779	1	LOC102548473
Chr1	71434845	71446948	12104	3' UTR	71416042	71447194	31153	1	Zfp787
Chr1	72359143	72360373	1231	3' UTR	72356880	72361358	4479	1	Zfp865
Chr1	72385623	72385870	248	Exon (XM_017588890.1/Fiz1, exon 3 of 3)	72379705	72387301	7597	1	Fiz1
Chr1	72386067	72386807	741	3' UTR	72379705	72387301	7597	1	Fiz1
Chr1	72399225	72402279	3055	5' UTR	72397887	72402329	4443	1	Zfp579
Chr1	72545035	72545282	248	3' UTR	72524569	72545330	20762	1	Isoc2b
Chr1	72559939	72560138	200	Exon (XM_006228290.2/Shisa7, exon 6 of 6)	72545413	72564513	19101	1	Shisa7
Chr1	72560685	72561281	597	3' UTR	72545413	72564513	19101	1	Shisa7
Chr1	72701088	72701236	149	3' UTR	72692089	72701549	9461	1	Tmem150b
Chr1	72701435	72701682	248	3' UTR	72701281	72725511	24231	2	Brsk1
Chr1	72756918	72757414	497	5' UTR	72756819	72783172	26354	1	Ppp6r1
Chr1	72783452	72783997	546	3' UTR	72756820	72784059	27240	1	Ppp6r1
Chr1	72786849	72787046	198	3' UTR	72784147	72787361	3215	1	Tmem86b
Chr1	72881487	72881635	149	Exon (XM_017588635.1/Dnaaf3, exon 12 of 12)	72874131	72882867	8737	1	Dnaaf3
Chr1	72891180	72896325	5146	Exon (NM_001277260.1/Tnnt1, exon 3 of 14)	72889270	72899629	10360	1	Tnnt1
Chr1	72924984	72925910	927	3' UTR	72903139	72926108	22970	1	Ppp1r12c
Chr1	72982123	72982868	746	3' UTR	72956017	72983811	27795	1	Rdh13
Chr1	73719006	73719452	447	Exon (XM_008758945.2/Cdc42ep5, exon 2 of 2)	73717207	73719600	2394	1	Cdc42ep5
Chr1	73721455	73722931	1477	3' UTR	73722088	73733788	11701	2	Leng8
Chr1	75356318	75374397	18080	5' UTR	75356212	75394427	38216	1	Lig1
Chr1	78012204	78012797	594	3' UTR	77994227	78012836	18610	1	Napa
Chr1	78035262	78035412	151	Exon (NM_078619.1/Slc8a2, exon 2 of 10)	78029555	78054042	24488	1	Slc8a2
Chr1	78078124	78079300	1177	3' UTR	78069260	78112488	43229	2	Dhx34
Chr1	78079400	78079648	249	3' UTR	78069260	78112488	43229	2	Dhx34
Chr1	78266833	78267269	437	3' UTR	78261491	78267802	6312	1	Bbc3
Chr1	78369767	78378359	8593	Exon (XM_006228486.3/Zc3h4, exon 2 of 14)	78352833	78390906	38074	1	Zc3h4
Chr1	78383031	78386153	3123	Exon (XM_006228486.3/Zc3h4, exon 12 of 14)	78352833	78390906	38074	1	Zc3h4
Chr1	78387317	78388863	1547	3' UTR	78352833	78390906	38074	1	Zc3h4
Chr1	78390408	78390756	349	3' UTR	78352833	78390906	38074	1	Zc3h4
Chr1	78420138	78420427	290	3' UTR	78417719	78420427	2709	1	Tmem160
Chr1	78663691	78663835	145	3' UTR	78624183	78663980	39798	1	Ceacam9
Chr1	78722174	78724042	1869	Exon (NM_175758.3/Slc1a5, exon 6 of 8)	78710686	78724789	14104	1	Slc1a5
Chr1	78724291	78724490	200	3' UTR	78710686	78724789	14104	1	Slc1a5
Chr1	78795388	78796173	786	3' UTR	78767911	78796223	28313	1	Prkd2
Chr1	78800852	78801000	149	5' UTR	78800754	78812483	11730	1	Dact3
Chr1	78820271	78821541	1271	5' UTR	78821524	78822171	648	1	Gng8
Chr1	78821975	78822124	150	3' UTR	78818360	78822171	3812	1	Gng8
Chr1	78876650	78878779	2130	3' UTR	78876205	78878779	2575	1	Pnmal2
Chr1	78893329	78895860	2532	5' UTR	78883239	78896551	13313	1	Pnmal1
Chr1	78934316	78934961	646	Exon (NM_001009533.2/Ccdc8, exon 1 of 1)	78933372	78936700	3329	1	Ccdc8
Chr1	79769525	79769669	145	Exon (NM_001017468.2/Micb, exon 2 of 5)	79754587	79772092	17506	1	Micb
Chr1	79864749	79865099	351	Exon (XM_008759097.1/Nova2, exon 4 of 4)	79831737	79866147	34411	1	Nova2
Chr1	79865648	79866047	400	3' UTR	79831737	79866147	34411	1	Nova2
Chr1	79899559	79908161	8603	Exon (XM_006228452.3/Mypop, exon 2 of 3)	79898492	79909336	10845	1	Mypop
Chr1	79911565	79912204	640	5' UTR	79911516	79914217	2702	1	Irf2bp1
Chr1	79912302	79913628	1327	Exon (NM_001107483.1/Irf2bp1, exon 1 of 1)	79911516	79914217	2702	1	Irf2bp1
Chr1	79913726	79914070	345	3' UTR	79911516	79914217	2702	1	Irf2bp1
Chr1	79978920	79979168	249	3' UTR	79972899	79981277	8379	2	LOC108349062
Chr1	79983356	79987948	4593	3' UTR	79981270	79987997	6728	1	Dmwd
Chr1	79989094	79989244	151	5' UTR	79988096	79998074	9979	1	Dmpk
Chr1	79998959	79999358	400	3' UTR	79988096	79999358	11263	1	Dmpk
Chr1	80003007	80003506	500	3' UTR	80000106	80005303	5198	1	Six5
Chr1	80042489	80043283	795	5' UTR	80028873	80045666	16794	1	Fbxo46
Chr1	80043382	80044177	796	Exon (XM_006228399.3/Fbxo46, exon 3 of 3)	80028873	80045666	16794	1	Fbxo46
Chr1	80135096	80136040	945	5' UTR	80135297	80136785	1489	1	Gpr4
Chr1	80136140	80136736	597	3' UTR	80125639	80136786	11148	1	Gpr4
Chr1	80141729	80159355	17627	5' UTR	80141630	80160145	18516	1	Opa3
Chr1	80159552	80160145	594	3' UTR	80141630	80160145	18516	1	Opa3
Chr1	80306135	80307284	1150	3' UTR	80293574	80307334	13761	1	Ercc2
Chr1	80417611	80422837	5227	5' UTR	80417639	80424424	6786	1	Trappc6a
Chr1	80432838	80433038	201	3' UTR	80424507	80434137	9631	1	Nkpd1
Chr1	80851264	80853043	1780	3' UTR	80850783	80869481	18699	2	Igsf23
Chr1	80920893	80921158	266	5' UTR	80921105	80940038	18934	1	Zfp180
Chr1	80923849	80939989	16141	5' UTR	80933379	80936142	2764	2	LOC108348994
Chr1	80953355	80956055	2701	Exon (XM_006228422.3/Zfp112, exon 3 of 5)	80944118	80958948	14831	1	Zfp112
Chr1	80956203	80956401	199	Exon (XM_006228422.3/Zfp112, exon 5 of 5)	80944118	80958948	14831	1	Zfp112
Chr1	80956747	80957094	348	Exon (XM_006228422.3/Zfp112, exon 5 of 5)	80944118	80958948	14831	1	Zfp112
Chr1	80957193	80957737	545	Exon (XM_006228422.3/Zfp112, exon 5 of 5)	80944118	80958948	14831	1	Zfp112
Chr1	80957984	80958132	149	Exon (XM_006228422.3/Zfp112, exon 5 of 5)	80944118	80958948	14831	1	Zfp112
Chr1	80958231	80958577	347	3' UTR	80944118	80958948	14831	1	Zfp112
Chr1	80972755	80973398	644	Exon (XM_006228505.3/Znf235, exon 3 of 3)	80965779	80975525	9747	1	Znf235
Chr1	80973695	80974437	743	Exon (XM_006228505.3/Znf235, exon 3 of 3)	80965779	80975525	9747	1	Znf235
Chr1	80974833	80975080	248	3' UTR	80965779	80975525	9747	1	Znf235
Chr1	81079371	81079520	150	Exon (XM_017590010.1/LOC102548600, exon 3 of 4)	81072880	81081258	8379	1	LOC102548600
Chr1	81079817	81081208	1392	3' UTR	81072880	81081258	8379	1	LOC102548600
Chr1	81096534	81100248	3715	3' UTR	81093642	81100348	6707	1	LOC102548503
Chr1	81242988	81245836	2849	3' UTR	81227855	81245986	18132	1	Kcnn4
Chr1	81282694	81282843	150	3' UTR	81259450	81282893	23444	1	Smg9
Chr1	81373471	81381739	8269	5' UTR	81376251	81377986	1736	2	Srrm5
Chr1	81381837	81381985	149	3' UTR	81371144	81382084	10941	1	Zfp428
Chr1	81396576	81396825	250	Exon (NM_001135742.2/Irgq, exon 2 of 3)	81395922	81403872	7951	1	Irgq
Chr1	81396925	81400633	3709	3' UTR	81395922	81403872	7951	1	Irgq
Chr1	81403324	81403822	499	3' UTR	81395922	81403872	7951	1	Irgq
Chr1	81476170	81479929	3760	Exon (NM_001191622.1/Phldb3, exon 3 of 18)	81474553	81492631	18079	1	Phldb3
Chr1	81503711	81504157	447	3' UTR	81499856	81504306	4451	1	Lypd3
Chr1	81952166	81955064	2899	5' UTR	81952175	81957330	5156	1	Zfp574
Chr1	81955162	81956148	987	Exon (NM_001024258.1/Zfp574, exon 2 of 2)	81952067	81957330	5264	1	Zfp574
Chr1	81956443	81957182	740	3' UTR	81952067	81957330	5264	1	Zfp574
Chr1	82003955	82004155	201	Exon (XR_590093.2/LOC103691054, exon 1 of 2)	82003806	82026540	22735	1	LOC103691054
Chr1	82025493	82025693	201	Exon (XR_590093.2/LOC103691054, exon 2 of 2)	82003806	82026540	22735	1	LOC103691054
Chr1	82025942	82026091	150	Exon (XR_590093.2/LOC103691054, exon 2 of 2)	82003806	82026540	22735	1	LOC103691054
Chr1	82093009	82093209	201	5' UTR	82088955	82097444	8490	1	Zfp526
Chr1	82094250	82094400	151	Exon (XM_017590016.1/Zfp526, exon 3 of 3)	82088955	82097444	8490	1	Zfp526
Chr1	82095298	82095747	450	3' UTR	82088955	82097444	8490	1	Zfp526
Chr1	82097294	82097444	151	3' UTR	82097244	82108203	10960	2	Gsk3a
Chr1	82137249	82140102	2854	5' UTR	82135440	82163007	27568	1	Cic
Chr1	82140202	82140401	200	Exon (XM_008758934.2/Cic, exon 2 of 21)	82135440	82163007	27568	1	Cic
Chr1	82140801	82140950	150	Exon (XM_008758934.2/Cic, exon 2 of 21)	82135440	82163007	27568	1	Cic
Chr1	82141050	82141200	151	Exon (XM_008758934.2/Cic, exon 2 of 21)	82135440	82163007	27568	1	Cic
Chr1	82141300	82141899	600	Exon (XM_008758934.2/Cic, exon 2 of 21)	82135440	82163007	27568	1	Cic
Chr1	82157243	82157593	351	Exon (XM_008758934.2/Cic, exon 11 of 21)	82135440	82163007	27568	1	Cic
Chr1	82162708	82162957	250	3' UTR	82135440	82163007	27568	1	Cic
Chr1	82183533	82183878	346	3' UTR	82174379	82184075	9697	1	Tmem145
Chr1	82226084	82231897	5814	3' UTR	82184671	82234035	49365	1	Megf8
Chr1	82232147	82232896	750	3' UTR	82184671	82234035	49365	1	Megf8
Chr1	82233745	82233895	151	3' UTR	82184671	82234035	49365	1	Megf8
Chr1	82417972	82419009	1038	3' UTR	82413171	82419157	5987	1	Atp5sl
Chr1	82421407	82421556	150	5' UTR	82419264	82422852	3589	1	B3gnt8
Chr1	82473851	82474153	303	5' UTR	82474106	82479699	5594	1	B9d2
Chr1	82474401	82479654	5254	3' UTR	82473254	82479704	6451	1	B9d2
Chr1	82496320	82497002	683	Exon (NM_021578.2/Tgfb1, exon 6 of 7)	82480875	82497196	16322	1	Tgfb1
Chr1	84090611	84091210	600	3' UTR	84067841	84091659	23819	1	Numbl
Chr1	84091359	84091609	251	3' UTR	84067841	84091659	23819	1	Numbl
Chr1	84283444	84284038	595	3' UTR	84280945	84284664	3720	1	Sertad3
Chr1	84284285	84284434	150	3' UTR	84280945	84284664	3720	1	Sertad3
Chr1	84293151	84296273	3123	5' UTR	84293102	84296370	3269	1	Sertad1
Chr1	84321925	84323317	1393	Exon (XM_017589764.1/Prx, exon 7 of 7)	84302074	84324560	22487	1	Prx
Chr1	84336240	84338094	1855	Exon (NM_001024776.1/Hipk4, exon 3 of 4)	84328114	84338486	10373	1	Hipk4
Chr1	84375924	84384921	8998	3' UTR	84361715	84385730	24016	1	RGD1307554
Chr1	84447866	84450327	2462	3' UTR	84400939	84451223	50285	1	Akt2
Chr1	84450874	84451173	300	3' UTR	84400939	84451223	50285	1	Akt2
Chr1	84542424	84542622	199	Exon (XM_008759209.2/LOC100909824, exon 6 of 6)	84525298	84546389	21092	1	LOC100909824
Chr1	84543019	84543167	149	Exon (XM_008759209.2/LOC100909824, exon 6 of 6)	84525298	84546389	21092	1	LOC100909824
Chr1	84543266	84543564	299	Exon (XM_008759209.2/LOC100909824, exon 6 of 6)	84525298	84546389	21092	1	LOC100909824
Chr1	84543663	84543861	199	Exon (XM_008759209.2/LOC100909824, exon 6 of 6)	84525298	84546389	21092	1	LOC100909824
Chr1	84582076	84584807	2732	Exon (XM_006228602.3/LOC100910046, exon 3 of 5)	84576059	84598150	22092	1	LOC100910046
Chr1	84652717	84653366	650	Exon (XM_017590023.1/LOC100910046, exon 5 of 5)	84576110	84656464	80355	1	LOC100910046
Chr1	84653766	84654016	251	Exon (XM_017590023.1/LOC100910046, exon 5 of 5)	84576110	84656464	80355	1	LOC100910046
Chr1	84696399	84696648	250	Exon (XM_006228592.3/Zfp780b, exon 5 of 6)	84676591	84700075	23485	1	Zfp780b
Chr1	84697293	84697641	349	Exon (XM_006228592.3/Zfp780b, exon 5 of 6)	84676591	84700075	23485	1	Zfp780b
Chr1	84698088	84698635	548	Exon (XM_006228592.3/Zfp780b, exon 5 of 6)	84676591	84700075	23485	1	Zfp780b
Chr1	84698734	84699032	299	3' UTR	84676591	84700075	23485	1	Zfp780b
Chr1	84899628	84901579	1952	Exon (XR_350198.3/LOC102549611, exon 1 of 2)	84899192	84901773	2582	1	LOC102549611
Chr1	84903674	84903914	241	Exon (XR_001835703.1/LOC108349329, exon 2 of 2)	84902316	84904058	1743	1	LOC108349329
Chr1	85103617	85108129	4513	Exon (NM_001025643.1/Fbl, exon 1 of 8)	85103519	85112619	9101	1	Fbl
Chr1	85120011	85120840	830	3' UTR	85112819	85120840	8022	1	Dyrk1b
Chr1	85199680	85201498	1819	3' UTR	85162462	85201746	39285	1	Pak4
Chr1	85347803	85347952	150	Exon (XM_008759143.2/Samd4b, exon 3 of 13)	85324017	85362266	38250	1	Samd4b
Chr1	85372844	85373691	848	3' UTR	85368288	85373691	5404	1	Med29
Chr1	85380856	85381588	733	Exon (NM_133290.3/Zfp36, exon 2 of 2)	85380088	85382565	2478	1	Zfp36
Chr1	85381832	85382418	587	3' UTR	85380088	85382565	2478	1	Zfp36
Chr1	85396647	85399501	2855	3' UTR	85386492	85399699	13208	1	Plekhg2
Chr1	85437830	85449683	11854	5' UTR	85437780	85466854	29075	1	Supt5h
Chr1	85466556	85466705	150	3' UTR	85437780	85466854	29075	1	Supt5h
Chr1	85477304	85480764	3461	3' UTR	85470810	85480813	10004	1	Timm50
Chr1	86877871	86878018	148	3' UTR	86872808	86878709	5902	1	Fbxo27
Chr1	86939000	86939597	598	Exon (XM_008759219.1/Ccer2, exon 5 of 5)	86936391	86939994	3604	1	Ccer2
Chr1	86996197	86998231	2035	5' UTR	86994090	87006765	12676	1	Hnrnpl
Chr1	87078149	87078348	200	3' UTR	87078012	87147308	69297	2	Actn4
Chr1	87228524	87232696	4173	5' UTR	87228581	87232842	4262	1	Ppp1r14a
Chr1	87656705	87657950	1246	3' UTR	87647051	87662033	14983	1	Zfp84
Chr1	87658050	87658946	897	3' UTR	87647051	87662033	14983	1	Zfp84
Chr1	87659195	87659444	250	3' UTR	87647051	87662033	14983	1	Zfp84
Chr1	87659892	87660041	150	3' UTR	87647051	87662033	14983	1	Zfp84
Chr1	87708666	87709560	895	3' UTR	87665844	87711398	45555	1	LOC102547413
Chr1	87709659	87710106	448	3' UTR	87665844	87711398	45555	1	LOC102547413
Chr1	87958041	87958620	580	Exon (XM_006228716.3/Map4k1, exon 29 of 32)	87937126	87959514	22389	1	Map4k1
Chr1	88113502	88113802	301	5' UTR	88112873	88116990	4118	1	Ggn
Chr1	88587175	88590912	3738	Exon (NM_144749.1/Zfp382, exon 3 of 5)	88582641	88603219	20579	1	Zfp382
Chr1	88591012	88591911	900	Exon (NM_144749.1/Zfp382, exon 4 of 5)	88582641	88603219	20579	1	Zfp382
Chr1	88592011	88603169	11159	3' UTR	88582641	88603219	20579	1	Zfp382
Chr1	88603591	88604384	794	3' UTR	88603492	88604384	893	1	LOC100912964
Chr1	88623176	88623372	197	3' UTR	88619619	88623394	3776	1	Cox7a1
Chr1	88875511	88879164	3654	3' UTR	88875370	88879305	3936	1	Tyrobp
Chr1	89009723	89010208	486	3' UTR	89008117	89010256	2140	1	Hspb6
Chr1	89202926	89203723	798	Exon (NM_001198590.1/Sbsn, exon 1 of 4)	89202527	89206994	4468	1	Sbsn
Chr1	89203822	89203972	151	Exon (NM_001198590.1/Sbsn, exon 1 of 4)	89202527	89206994	4468	1	Sbsn
Chr1	89205929	89206944	1016	3' UTR	89202527	89206994	4468	1	Sbsn
Chr1	89491886	89492383	498	5' UTR	89492104	89501906	9803	1	Lgi4
Chr1	89499742	89502492	2751	3' UTR	89491588	89502939	11352	1	Lgi4
Chr1	89502641	89502840	200	3' UTR	89502561	89509343	6783	2	Fxyd3
Chr1	89683957	89684203	247	3' UTR	89672308	89686143	13836	1	LOC100910258
Chr1	91284835	91284981	147	3' UTR	90820670	91285128	464459	1	Pepd
Chr1	90919179	90920302	1124	Exon (XM_017590058.1/LOC108348197, exon 2 of 6)	90918031	90921237	3207	1	LOC108348197
Chr1	91364531	91365224	694	3' UTR	91363492	91366164	2673	1	Cebpa
Chr1	91365768	91365917	150	3' UTR	91363492	91366164	2673	1	Cebpa
Chr1	91648083	91656297	8215	3' UTR	91596344	91657388	61045	1	Rhpn2
Chr1	91688382	91697509	9128	3' UTR	91663723	91699362	35640	1	Cep89
Chr1	91697608	91697758	151	3' UTR	91663723	91699362	35640	1	Cep89
Chr1	91723012	91732437	9426	Exon (XM_006228876.3/Slc7a9, exon 10 of 15)	91709034	91738492	29459	1	Slc7a9
Chr1	92777974	92778320	347	Exon (XR_001835726.1/LOC108349564, exon 2 of 2)	92775974	92780301	4328	1	LOC108349564
Chr1	92778865	92779013	149	Exon (XR_001835726.1/LOC108349564, exon 2 of 2)	92775974	92780301	4328	1	LOC108349564
Chr1	92779162	92779311	150	Exon (XR_001835726.1/LOC108349564, exon 2 of 2)	92775974	92780301	4328	1	LOC108349564
Chr1	92820078	92821412	1335	Exon (XR_001835727.1/LOC108349565, exon 4 of 4)	92810369	92821758	11390	1	LOC108349565
Chr1	94579135	94585258	6124	3' UTR	94572714	94587842	15129	1	LOC690000
Chr1	94587544	94587693	150	3' UTR	94572714	94587842	15129	1	LOC690000
Chr1	94864450	94865648	1199	3' UTR	94847224	94867345	20122	1	LOC102548231
Chr1	94892053	94892310	258	Exon (XM_006228926.3/LOC102548320, exon 4 of 5)	94871479	94896090	24612	1	LOC102548320
Chr1	94892609	94892808	200	Exon (XM_006228926.3/LOC102548320, exon 5 of 5)	94871479	94896090	24612	1	LOC102548320
Chr1	94892957	94893106	150	Exon (XM_006228926.3/LOC102548320, exon 5 of 5)	94871479	94896090	24612	1	LOC102548320
Chr1	94893355	94893802	448	Exon (XM_006228926.3/LOC102548320, exon 5 of 5)	94871479	94896090	24612	1	LOC102548320
Chr1	94893902	94894747	846	3' UTR	94871479	94896090	24612	1	LOC102548320
Chr1	95435449	95435599	151	3' UTR	95423646	95437146	13501	1	Zfp939
Chr1	97632967	97633414	448	5' UTR	97632473	97660962	28490	1	Vstm2b
Chr1	97634120	97652379	18260	3' UTR	97632473	97660962	28490	1	Vstm2b
Chr1	97660317	97660763	447	3' UTR	97632473	97660962	28490	1	Vstm2b
Chr1	98197844	98200891	3048	3' UTR	98168457	98201189	32733	1	Zfp141
Chr1	98228278	98229713	1436	5' UTR	98210294	98232659	22366	1	LOC102555672
Chr1	98402994	98403341	348	3' UTR	98388811	98403539	14729	1	Cd33
Chr1	98456004	98456351	348	3' UTR	98440186	98457942	17757	1	Iglon5
Chr1	98456451	98457743	1293	3' UTR	98440186	98457942	17757	1	Iglon5
Chr1	98627450	98628049	600	5' UTR	98614943	98631142	16200	1	Dzf17
Chr1	98628498	98630194	1697	3' UTR	98614943	98631142	16200	1	Dzf17
Chr1	99494352	99494500	149	Exon (XM_008759440.2/LOC102546648, exon 6 of 6)	99483176	99496427	13252	1	LOC102546648
Chr1	99495093	99496229	1137	3' UTR	99483176	99496427	13252	1	LOC102546648
Chr1	99510931	99512722	1792	3' UTR	99500211	99513269	13059	1	LOC102556967
Chr1	99538486	99538685	200	Exon (XM_006229045.3/Zfp819, exon 7 of 7)	99521177	99539232	18056	1	Zfp819
Chr1	99575703	99575901	199	3' UTR	99559726	99576098	16373	1	Ceacam18
Chr1	99603038	99605012	1975	3' UTR	99599608	99605411	5804	1	Ctu1
Chr1	100224738	100226625	1888	5' UTR	100226311	100234509	8199	2	Acpt
Chr1	100329659	100337865	8207	Exon (XM_008759416.2/Shank1, exon 19 of 25)	100297137	100342197	45061	1	Shank1
Chr1	100338313	100338910	598	Exon (XM_008759416.2/Shank1, exon 24 of 25)	100297137	100342197	45061	1	Shank1
Chr1	100339009	100340805	1797	3' UTR	100297137	100342197	45061	1	Shank1
Chr1	100342257	100344029	1773	3' UTR	100297137	100342750	45614	1	Shank1
Chr1	100395089	100400839	5751	5' UTR	100379236	100407862	28627	1	Syt3
Chr1	100400938	100401086	149	Exon (XM_008759325.2/Syt3, exon 5 of 11)	100379236	100407862	28627	1	Syt3
Chr1	100450365	100468864	18500	3' UTR	100434418	100468889	34472	1	Lrrc4b
Chr1	100505388	100506069	682	3' UTR	100501556	100506133	4578	1	Fam71e1
Chr1	100598330	100600624	2295	Exon (XM_008759306.2/Kcnc3, exon 2 of 4)	100593453	100601751	8299	1	Kcnc3
Chr1	100606878	100607027	150	3' UTR	100593453	100607874	14422	1	Kcnc3
Chr1	100607376	100607824	449	3' UTR	100593453	100607874	14422	1	Kcnc3
Chr1	100811387	100814019	2633	5' UTR	100807821	100812410	4590	2	Atf5
Chr1	100814859	100826971	12113	5' UTR	100811727	100836901	25175	1	Il4i1
Chr1	100811777	100828412	16636	5' UTR	100807821	100812410	4590	2	Atf5
Chr1	100835141	100835860	720	Exon (XM_006229191.3/Il4i1, exon 7 of 9)	100811727	100836901	25175	1	Il4i1
Chr1	100836108	100836504	397	Exon (XM_006229191.3/Il4i1, exon 9 of 9)	100811727	100836901	25175	1	Il4i1
Chr1	100846441	100846589	149	5' UTR	100845443	100851961	6519	1	Akt1s1
Chr1	100850330	100851517	1188	3' UTR	100845443	100851961	6519	1	Akt1s1
Chr1	100858954	100859103	150	3' UTR	100853475	100859202	5728	1	Pnkp
Chr1	100896616	100896762	147	3' UTR	100896582	100926443	29862	2	Ap2a1
Chr1	100995641	100997153	1513	Exon (XM_006229021.1/Irf3, exon 6 of 8)	100992244	100997202	4959	1	Irf3
Chr1	101055669	101068923	13255	5' UTR	101055571	101072487	16917	1	Nosip
Chr1	101325330	101325625	296	Exon (NM_181369.2/Hrc, exon 1 of 6)	101324788	101328391	3604	1	Hrc
Chr1	101325723	101326216	494	Exon (NM_181369.2/Hrc, exon 1 of 6)	101324788	101328391	3604	1	Hrc
Chr1	101326314	101326659	346	Exon (NM_181369.2/Hrc, exon 1 of 6)	101324788	101328391	3604	1	Hrc
Chr1	101412148	101412447	300	5' UTR	101409992	101413000	3009	1	Lhb
Chr1	101517802	101522237	4436	5' UTR	101517896	101540802	22907	1	Plekha4
Chr1	101621254	101621550	297	3' UTR	101609209	101621648	12440	1	Rasip1
Chr1	101682058	101682447	390	5' UTR	101682180	101687291	5112	1	Car11
Chr1	101686285	101687163	879	Exon (XM_017589147.1/Car11, exon 7 of 8)	101682009	101687291	5283	1	Car11
Chr1	101687994	101688384	391	5' UTR	101687896	101692845	4950	1	Dbp
Chr1	101691054	101692747	1694	3' UTR	101687896	101692845	4950	1	Dbp
Chr1	101782018	101782598	581	Exon (XM_008759459.2/Lmtk3, exon 11 of 16)	101773206	101792420	19215	1	Lmtk3
Chr1	101783192	101783489	298	Exon (XM_008759459.2/Lmtk3, exon 12 of 16)	101773206	101792420	19215	1	Lmtk3
Chr1	101783588	101792420	8833	3' UTR	101773206	101792420	19215	1	Lmtk3
Chr1	101898654	101899075	422	3' UTR	101884012	101900064	16053	1	Tmem143
Chr1	101899473	101899970	498	3' UTR	101884012	101900064	16053	1	Tmem143
Chr1	101932202	101932401	200	Exon (XM_008759387.2/Ccdc114, exon 16 of 16)	101904042	101932999	28958	1	Ccdc114
Chr1	101932551	101932850	300	3' UTR	101904042	101932999	28958	1	Ccdc114
Chr1	102414851	102415899	1049	5' UTR	102414352	102456718	42367	1	Kcnc1
Chr1	102415999	102456668	40670	3' UTR	102414352	102456718	42367	1	Kcnc1
Chr1	102872075	102877239	5165	3' UTR	102849618	102877939	28322	1	Gtf2h1
Chr1	103176937	103177283	347	3' UTR	103173032	103177382	4351	1	Tmem86a
Chr1	104786366	104786566	201	Exon (XM_017588749.1/Nav2, exon 8 of 42)	104575765	104941554	365790	1	Nav2
Chr1	104881440	104881590	151	Exon (XM_017588749.1/Nav2, exon 15 of 42)	104575765	104941554	365790	1	Nav2
Chr1	104938264	104938763	500	3' UTR	104575765	104941554	365790	1	Nav2
Chr1	104941205	104941404	200	3' UTR	104575765	104941554	365790	1	Nav2
Chr1	105108772	105109214	443	3' UTR	105094272	105109459	15188	1	Htatip2
Chr1	105334425	105334873	449	3' UTR	105270418	105336369	65952	1	Slc6a5
Chr1	106211447	106218621	7175	3' UTR	105348577	106218970	870394	1	Nell1
Chr1	106971221	106971370	150	3' UTR	106873580	106971769	98190	1	Ano5
Chr1	106971470	106971669	200	3' UTR	106873580	106971769	98190	1	Ano5
Chr1	106998596	106999094	499	5' UTR	106998704	107038704	40001	1	Slc17a6
Chr1	107036677	107037573	897	3' UTR	106980463	107038704	58242	1	Slc17a6
Chr1	113252013	113265169	13157	3' UTR	113034251	113265364	231114	1	Gabrb3
Chr1	114651551	114653737	2187	3' UTR	114453033	114653787	200755	1	Herc2
Chr1	116140299	116141443	1145	3' UTR	115973343	116141892	168550	1	Atp10a
Chr1	116141543	116141842	300	3' UTR	115973343	116141892	168550	1	Atp10a
Chr1	116587050	116587598	549	5' UTR	116586901	116675617	88717	1	Ube3a
Chr1	116587946	116588096	151	5' UTR	116586901	116675617	88717	1	Ube3a
Chr1	116588503	116596379	7877	5' UTR	116596330	116675617	79288	1	Ube3a
Chr1	116644030	116648005	3976	Exon (XM_006229310.3/Ube3a, exon 4 of 12)	116586901	116675617	88717	1	Ube3a
Chr1	116648105	116656430	8326	Exon (XM_006229310.3/Ube3a, exon 5 of 12)	116586901	116675617	88717	1	Ube3a
Chr1	116675879	116676087	209	3' UTR	116587815	116678161	90347	1	Ube3a
Chr1	122982854	122983354	501	3' UTR	122981755	122983354	1600	1	Ndn
Chr1	123017999	123018298	300	Exon (XM_001054803.6/Magel2, exon 1 of 1)	123015404	123019945	4542	1	Magel2
Chr1	123018398	123019546	1149	3' UTR	123015404	123019945	4542	1	Magel2
Chr1	123019646	123019845	200	3' UTR	123015404	123019945	4542	1	Magel2
Chr1	124637006	124653045	16040	Exon (XM_008759566.2/Otud7a, exon 11 of 14)	124311873	124655437	343565	1	Otud7a
Chr1	124653842	124654141	300	3' UTR	124311873	124655437	343565	1	Otud7a
Chr1	124484240	124485088	849	Exon (NM_001134706.1/Hmgn5b, exon 6 of 6)	124477164	124485737	8574	1	Hmgn5b
Chr1	125172237	125173707	1471	3' UTR	125124743	125175857	51115	1	Mtmr10
Chr1	125174107	125174557	451	3' UTR	125124743	125175857	51115	1	Mtmr10
Chr1	125175307	125175757	451	3' UTR	125124743	125175857	51115	1	Mtmr10
Chr1	125239656	125252548	12893	3' UTR	125229487	125252669	23183	1	Mcee
Chr1	125490903	125511075	20173	Exon (NM_031780.1/Apba2, exon 3 of 14)	125367273	125547741	180469	1	Apba2
Chr1	126932499	126947292	14794	3' UTR	126749508	126947392	197885	1	Pcsk6
Chr1	127025495	127070531	45037	3' UTR	127010587	127071570	60984	1	Chsy1
Chr1	127622296	127625434	3139	Exon (XM_006229358.3/Lins1, exon 5 of 7)	127599647	127625583	25937	1	Lins1
Chr1	128124621	128125468	848	3' UTR	127802872	128126764	323893	1	Adamts17
Chr1	128199454	128200181	728	5' UTR	128199100	128204989	5890	1	Lysmd4
Chr1	128200280	128203501	3222	3' UTR	128199100	128204989	5890	1	Lysmd4
Chr1	128203799	128204047	249	3' UTR	128199100	128204989	5890	1	Lysmd4
Chr1	128978214	129142534	164321	Exon (NM_052807.2/Igf1r, exon 2 of 21)	128924921	129207054	282134	1	Igf1r
Chr1	129206242	129206691	450	3' UTR	128924921	129207054	282134	1	Igf1r
Chr1	129210926	129211225	300	3' UTR	128924921	129213816	288896	1	Igf1r
Chr1	129211524	129212072	549	3' UTR	128924921	129213816	288896	1	Igf1r
Chr1	129325788	129332852	7065	3' UTR	129254242	129330961	76720	1	Fam169b
Chr1	131503848	131504098	251	Exon (XR_001835859.1/LOC102553329, exon 10 of 18)	131459443	131625450	166008	1	LOC102553329
Chr1	134699401	134727912	28512	5' UTR	134727896	134742512	14617	1	Rgma
Chr1	134731842	134741417	9576	3' UTR	134699053	134742511	43459	1	Rgma
Chr1	134992763	134992912	150	Exon (XM_008759598.1/LOC499179, exon 3 of 7)	134991934	135000640	8707	1	LOC499179
Chr1	134993012	134993310	299	Exon (XM_008759598.1/LOC499179, exon 3 of 7)	134991934	135000640	8707	1	LOC499179
Chr1	135000142	135000292	151	Exon (XM_008759598.1/LOC499179, exon 6 of 7)	134991934	135000640	8707	1	LOC499179
Chr1	135126331	135134480	8150	3' UTR	135081596	135180266	98671	1	Fam174b
Chr1	135134579	135162552	27974	3' UTR	135081596	135180266	98671	1	Fam174b
Chr1	135191463	135191612	150	Exon (XR_590340.2/LOC103691163, exon 2 of 2)	135187571	135193946	6376	1	LOC103691163
Chr1	137305091	137308986	3896	Exon (NM_001106271.2/Akap13, exon 33 of 38)	137089558	137315272	225715	1	Akap13
Chr1	137309086	137311480	2395	3' UTR	137089558	137315272	225715	1	Akap13
Chr1	137311630	137311779	150	3' UTR	137089558	137315272	225715	1	Akap13
Chr1	140478147	140487151	9005	3' UTR	140477645	140487249	9605	1	Mrps11
Chr1	140587962	140592659	4698	Exon (XM_006229399.3/Aen, exon 2 of 4)	140584328	140593749	9422	1	Aen
Chr1	140608645	140608793	149	3' UTR	140602553	140608892	6340	1	Isg20
Chr1	140807239	140808476	1238	Exon (NM_022190.1/Acan, exon 13 of 22)	140762758	140824441	61684	1	Acan
Chr1	140809075	140809224	150	Exon (NM_022190.1/Acan, exon 14 of 22)	140762758	140824441	61684	1	Acan
Chr1	140809773	140810425	653	Exon (NM_022190.1/Acan, exon 14 of 22)	140762758	140824441	61684	1	Acan
Chr1	140810524	140818338	7815	Exon (NM_022190.1/Acan, exon 16 of 22)	140762758	140824441	61684	1	Acan
Chr1	141082524	141087060	4537	3' UTR	140998240	141087405	89166	1	Abhd2
Chr1	141171883	141172898	1016	3' UTR	141116565	141172997	56433	1	Fanci
Chr1	141253788	141255763	1976	Exon (XR_001835883.1/LOC102555346, exon 4 of 5)	141224102	141258460	34359	1	LOC102555346
Chr1	141258010	141258360	351	Exon (XR_001835883.1/LOC102555346, exon 5 of 5)	141224102	141258460	34359	1	LOC102555346
Chr1	141432966	141433116	151	3' UTR	141391738	141433615	41878	1	Ticrr
Chr1	141766518	141766768	251	5' UTR	141763621	141870127	106507	1	Zfp710
Chr1	141860237	141861037	801	Exon (XM_008759508.2/Zfp710, exon 2 of 5)	141763621	141870127	106507	1	Zfp710
Chr1	141866140	141869974	3835	3' UTR	141763621	141870127	106507	1	Zfp710
Chr1	142013399	142013650	252	3' UTR	141986145	142014400	28256	1	Sema4b
Chr1	142014100	142014300	201	3' UTR	141986145	142014400	28256	1	Sema4b
Chr1	142027289	142028676	1388	3' UTR	142020696	142028752	8057	1	Gdpgp1
Chr1	142050606	142056237	5632	3' UTR	142050458	142056336	5879	1	Ngrn
Chr1	142136527	142137599	1073	5' UTR	142136428	142137374	947	1	Hddc3
Chr1	142137698	142137847	150	3' UTR	142136452	142138737	2286	1	Hddc3
Chr1	142682308	142682456	149	Exon (XM_006229466.3/Zscan2, exon 2 of 3)	142679308	142695232	15925	1	Zscan2
Chr1	142693411	142693952	542	Exon (XM_006229466.3/Zscan2, exon 3 of 3)	142679308	142695232	15925	1	Zscan2
Chr1	142694051	142694198	148	Exon (XM_006229466.3/Zscan2, exon 3 of 3)	142679308	142695232	15925	1	Zscan2
Chr1	142694592	142694986	395	3' UTR	142679308	142695232	15925	1	Zscan2
Chr1	142851083	142856089	5007	Exon (XM_006229425.3/Zfp592, exon 2 of 9)	142833999	142867706	33708	1	Zfp592
Chr1	142864247	142864611	365	Exon (XM_006229425.3/Zfp592, exon 6 of 9)	142833999	142867706	33708	1	Zfp592
Chr1	142865165	142867757	2593	3' UTR	142833999	142867706	33708	1	Zfp592
Chr1	142918137	142918385	249	Exon (XM_008759546.2/Alpk3, exon 5 of 13)	142882997	142931940	48944	1	Alpk3
Chr1	143425980	143427801	1822	Exon (NM_001130728.1/Whamm, exon 8 of 10)	143401986	143430356	28371	1	Whamm
Chr1	143427951	143430206	2256	3' UTR	143401986	143430356	28371	1	Whamm
Chr1	143703332	143703680	349	3' UTR	143702864	143751789	48926	2	Hdgfrp3
Chr1	144199805	144200004	200	3' UTR	144069641	144200030	130390	1	Sh3gl3
Chr1	144518315	144518913	599	Exon (NM_001107533.2/Adamtsl3, exon 21 of 30)	144238958	144561065	322108	1	Adamtsl3
Chr1	144559469	144559818	350	3' UTR	144238958	144561065	322108	1	Adamtsl3
Chr1	144715132	144740485	25354	3' UTR	144601425	144740634	139210	1	Efl1
Chr1	144833048	144833196	149	Exon (NM_001191626.1/Mex3b, exon 2 of 2)	144831523	144835758	4236	1	Mex3b
Chr1	144833344	144833688	345	Exon (NM_001191626.1/Mex3b, exon 2 of 2)	144831523	144835758	4236	1	Mex3b
Chr1	144833787	144833984	198	Exon (NM_001191626.1/Mex3b, exon 2 of 2)	144831523	144835758	4236	1	Mex3b
Chr1	144834329	144834772	444	3' UTR	144831523	144835758	4236	1	Mex3b
Chr1	145776046	145780001	3956	3' UTR	145770135	145780001	9867	1	Stard5
Chr1	146037642	146042949	5308	5' UTR	146030211	146043097	12887	1	Mesdc2
Chr1	146704986	146705934	949	Exon (XR_001835895.1/LOC102553298, exon 4 of 4)	146659395	146706084	46690	1	LOC102553298
Chr1	147021583	147022901	1319	3' UTR	147021436	147022950	1515	1	F8a1
Chr1	148445944	148446191	248	Exon (XM_006229649.3/LOC102546990, exon 2 of 2)	148445120	148446339	1220	1	LOC102546990
Chr1	148458796	148458945	150	3' UTR	148450213	148458945	8733	1	Mpp1
Chr1	151225941	151226091	151	Exon (XM_006229659.3/Grm5, exon 2 of 10)	151207846	151785038	577193	1	Grm5
Chr1	151730158	151782691	52534	Exon (XM_006229659.3/Grm5, exon 8 of 10)	151207846	151785038	577193	1	Grm5
Chr1	151783040	151784089	1050	3' UTR	151207846	151785038	577193	1	Grm5
Chr1	151949083	151949780	698	3' UTR	151918598	151949979	31382	1	Ctsc
Chr1	153589921	153592228	2308	Exon (NM_022623.2/Fzd4, exon 1 of 2)	153589471	153598376	8906	1	Fzd4
Chr1	153592928	153593377	450	3' UTR	153589471	153598376	8906	1	Fzd4
Chr1	153597276	153597576	301	3' UTR	153589471	153598376	8906	1	Fzd4
Chr1	154056529	154056727	199	3' UTR	153861535	154058608	197074	1	Me3
Chr1	154057123	154057321	199	3' UTR	153861535	154058608	197074	1	Me3
Chr1	154457182	154457430	249	3' UTR	154377229	154458966	81738	1	Picalm
Chr1	157272478	157272828	351	3' UTR	154916274	157274077	2357804	1	Dlg2
Chr1	157273677	157274077	401	3' UTR	154916274	157274077	2357804	1	Dlg2
Chr1	156283155	156283305	151	5' UTR	154916274	157274077	2357804	1	Dlg2
Chr1	157649640	157659924	10285	3' UTR	157638666	157654742	16077	2	LOC103691196
Chr1	157667773	157667923	151	3' UTR	157573344	157667973	94630	1	Rab30
Chr1	157749535	157749733	199	3' UTR	157701089	157750177	49089	1	Prcp
Chr1	157749881	157750029	149	3' UTR	157701089	157750177	49089	1	Prcp
Chr1	157920886	157922283	1398	3' UTR	157920786	157922283	1498	1	Fam181b
Chr1	161868589	161868989	401	Exon (XM_017589177.1/Tenm4, exon 32 of 34)	161183858	161885094	701237	1	Tenm4
Chr1	161869289	161876449	7161	Exon (XM_017589177.1/Tenm4, exon 32 of 34)	161183858	161885094	701237	1	Tenm4
Chr1	161876549	161881195	4647	3' UTR	161183858	161885094	701237	1	Tenm4
Chr1	161881295	161881495	201	3' UTR	161183858	161885094	701237	1	Tenm4
Chr1	161881895	161882095	201	3' UTR	161183858	161885094	701237	1	Tenm4
Chr1	161882195	161882545	351	3' UTR	161183858	161885094	701237	1	Tenm4
Chr1	161883944	161885044	1101	3' UTR	161183858	161885094	701237	1	Tenm4
Chr1	162034534	162034879	346	3' UTR	161922132	162035817	113686	1	Nars2
Chr1	162035323	162035521	199	3' UTR	161922132	162035817	113686	1	Nars2
Chr1	162211256	162279408	68153	Exon (XM_017589791.1/Gab2, exon 2 of 10)	162082876	162283379	200504	1	Gab2
Chr1	162279656	162280550	895	3' UTR	162082876	162283379	200504	1	Gab2
Chr1	162280996	162281245	250	3' UTR	162082876	162283379	200504	1	Gab2
Chr1	162282436	162282585	150	3' UTR	162082876	162283379	200504	1	Gab2
Chr1	162322358	162324292	1935	3' UTR	162307746	162325284	17539	1	Kctd21
Chr1	162361544	162362040	497	3' UTR	162342061	162362139	20079	1	Alg8
Chr1	162419471	162424273	4803	3' UTR	162418389	162424322	5934	1	Kctd14
Chr1	162629567	162640132	10566	Exon (XM_218939.9/Rsf1, exon 5 of 16)	162549222	162671962	122741	1	Rsf1
Chr1	162640232	162640880	649	Exon (XM_218939.9/Rsf1, exon 6 of 16)	162549222	162671962	122741	1	Rsf1
Chr1	162640979	162643785	2807	Exon (XM_218939.9/Rsf1, exon 6 of 16)	162549222	162671962	122741	1	Rsf1
Chr1	162658837	162665383	6547	3' UTR	162549222	162671962	122741	1	Rsf1
Chr1	162665483	162665632	150	3' UTR	162549222	162671962	122741	1	Rsf1
Chr1	162691235	162696451	5217	3' UTR	162676246	162696549	20304	1	Clns1a
Chr1	162879014	162882413	3400	3' UTR	162768156	162882685	114530	1	Pak1
Chr1	163453834	163454682	849	Exon (XM_006229747.3/Lrrc32, exon 3 of 3)	163443972	163457426	13455	1	Lrrc32
Chr1	163454782	163454981	200	Exon (XM_006229747.3/Lrrc32, exon 3 of 3)	163443972	163457426	13455	1	Lrrc32
Chr1	163455081	163455231	151	Exon (XM_006229747.3/Lrrc32, exon 3 of 3)	163443972	163457426	13455	1	Lrrc32
Chr1	163455630	163456229	600	3' UTR	163443972	163457426	13455	1	Lrrc32
Chr1	163456977	163457276	300	3' UTR	163443972	163457426	13455	1	Lrrc32
Chr1	163676272	163678498	2227	3' UTR	163663090	163679185	16096	1	Thap12
Chr1	163809823	163812611	2789	3' UTR	163794136	163813751	19616	1	Wnt11
Chr1	163812710	163812860	151	3' UTR	163794136	163813751	19616	1	Wnt11
Chr1	164225926	164226623	698	5' UTR	164225934	164292094	66161	1	Map6
Chr1	164226723	164226972	250	Exon (XM_017589059.1/Map6, exon 1 of 5)	164225776	164292094	66319	1	Map6
Chr1	164227720	164291845	64126	Exon (XM_017589059.1/Map6, exon 2 of 5)	164225776	164292094	66319	1	Map6
Chr1	164417162	164418056	895	3' UTR	164337176	164418056	80881	1	Gdpd5
Chr1	164562100	164567267	5168	3' UTR	164502099	164573947	71849	1	Arrb1
Chr1	164568269	164568916	648	3' UTR	164502099	164573947	71849	1	Arrb1
Chr1	165171626	165172025	400	3' UTR	165170645	165172972	2328	1	Lipt2
Chr1	165196081	165196467	387	3' UTR	165189934	165196605	6672	1	Kcne3
Chr1	165276716	165280585	3870	Exon (XM_006229793.2/Pgm2l1, exon 12 of 14)	165237847	165286977	49131	1	Pgm2l1
Chr1	165284882	165285331	450	3' UTR	165237847	165286977	49131	1	Pgm2l1
Chr1	165439698	165439847	150	Exon (XM_017588953.1/C2cd3, exon 23 of 31)	165382279	165463751	81473	1	C2cd3
Chr1	165464052	165476995	12944	3' UTR	165382279	165479307	97029	1	C2cd3
Chr1	165479391	165479590	200	3' UTR	165382279	165480088	97810	1	C2cd3
Chr1	165512344	165512644	301	3' UTR	165506375	165512744	6370	1	Ucp2
Chr1	165549368	165552178	2811	5' UTR	165549319	165552033	2715	1	Coa4
Chr1	165875535	165877177	1643	3' UTR	165723278	165880612	157335	1	Fam168a
Chr1	165878521	165879218	698	3' UTR	165723278	165880612	157335	1	Fam168a
Chr1	166393918	166394068	151	3' UTR	166140025	166395726	255702	1	Fchsd2
Chr1	166394168	166394467	300	3' UTR	166140025	166395726	255702	1	Fchsd2
Chr1	166455133	166457522	2390	3' UTR	166428780	166458413	29634	1	Stard10
Chr1	166457670	166458066	397	3' UTR	166428780	166458413	29634	1	Stard10
Chr1	166524901	166525100	200	3' UTR	166459062	166525200	66139	1	Arap1
Chr1	166624528	166624915	388	Exon (NM_001143847.1/Pde2a, exon 30 of 31)	166534643	166626147	91505	1	Pde2a
Chr1	166625163	166625362	200	3' UTR	166534643	166626147	91505	1	Pde2a
Chr1	166865035	166866095	1061	3' UTR	166739372	166866095	126724	1	Clpb
Chr1	166883369	166883598	230	Exon (XR_350595.2/LOC102547177, exon 2 of 2)	166876705	166883690	6986	1	LOC102547177
Chr1	166984363	166985313	951	3' UTR	166981738	166985363	3626	1	Anapc15
Chr1	166995885	166996607	723	3' UTR	166991474	166997045	5572	1	Lamtor1
Chr1	167071793	167085065	13273	Exon (NM_001100691.1/Numa1, exon 15 of 29)	167044544	167091453	46910	1	Numa1
Chr1	167090357	167090656	300	3' UTR	167044544	167091453	46910	1	Numa1
Chr1	167176768	167178424	1657	Exon (XM_006229903.3/LOC102549471, exon 8 of 10)	167158720	167180052	21333	1	LOC102549471
Chr1	167178523	167178868	346	3' UTR	167158720	167180052	21333	1	LOC102549471
Chr1	167179411	167179559	149	3' UTR	167158720	167180052	21333	1	LOC102549471
Chr1	167320555	167320705	151	5' UTR	167309021	167335550	26530	1	Pgap2
Chr1	167335350	167335500	151	3' UTR	167309021	167335550	26530	1	Pgap2
Chr1	167562145	167562540	396	3' UTR	167538387	167562688	24302	1	Rrm1
Chr1	167870729	167870878	150	Exon (XM_006229890.3/Olr63, exon 2 of 2)	167864303	167873267	8965	1	Olr63
Chr1	167871525	167871675	151	3' UTR	167864303	167873267	8965	1	Olr63
Chr1	167871824	167872023	200	3' UTR	167864303	167873267	8965	1	Olr63
Chr1	170383780	170385194	1415	Exon (NM_001006997.1/Smpd1, exon 1 of 6)	170383682	170387525	3844	1	Smpd1
Chr1	170385877	170387034	1158	Exon (NM_001006997.1/Smpd1, exon 3 of 6)	170383682	170387525	3844	1	Smpd1
Chr1	170387230	170387378	149	3' UTR	170383682	170387525	3844	1	Smpd1
Chr1	170473824	170474063	240	5' UTR	170473792	170501981	28190	1	Dnhd1
Chr1	170563651	170563801	151	Exon (XM_008759815.2/Dnhd1, exon 43 of 44)	170473792	170570220	96429	1	Dnhd1
Chr1	170568170	170568320	151	3' UTR	170473792	170570220	96429	1	Dnhd1
Chr1	171643652	171658432	14781	Exon (XM_006229961.3/Syt9, exon 2 of 6)	171592703	171720464	127762	1	Syt9
Chr1	171658532	171718057	59526	Exon (XM_006229961.3/Syt9, exon 3 of 6)	171592703	171720464	127762	1	Syt9
Chr1	171793832	171817084	23253	5' UTR	171816231	171969117	152887	1	Ppfibp2
Chr1	171816281	171820393	4113	5' UTR	171820278	171969117	148840	1	Ppfibp2
Chr1	171889231	171915808	26578	5' UTR	171915705	171969117	53413	1	Ppfibp2
Chr1	171939581	171943939	4359	Exon (XM_008759733.2/Ppfibp2, exon 9 of 26)	171816231	171969117	152887	1	Ppfibp2
Chr1	171964364	171966077	1714	3' UTR	171816231	171969117	152887	1	Ppfibp2
Chr1	173622274	173625323	3050	Exon (XM_017588828.1/Tub, exon 8 of 12)	173550929	173629550	78622	1	Tub
Chr1	173627710	173627859	150	3' UTR	173550929	173629550	78622	1	Tub
Chr1	173629401	173629550	150	3' UTR	173629218	173661794	32577	2	Ric3
Chr1	174330774	174330921	148	5' UTR	174330628	174338682	8055	1	Akip1
Chr1	174334304	174338714	4411	3' UTR	174330628	174338682	8055	1	Akip1
Chr1	174690058	174693386	3329	Exon (NM_001107545.1/Ipo7, exon 22 of 25)	174655939	174696173	40235	1	Ipo7
Chr1	174693485	174694636	1152	3' UTR	174655939	174696173	40235	1	Ipo7
Chr1	174737041	174737537	497	3' UTR	174702310	174738133	35824	1	Zfp143
Chr1	174783235	174785257	2023	3' UTR	174765228	174790882	25655	1	Wee1
Chr1	174905195	174922120	16926	3' UTR	174862683	174924101	61419	1	Swap70
Chr1	174922665	174922863	199	3' UTR	174862683	174924101	61419	1	Swap70
Chr1	175445978	175447063	1086	3' UTR	175443189	175447260	4072	1	Adm
Chr1	175587003	175587258	256	5' UTR	175587167	175630479	43313	1	Ampd3
Chr1	175861827	175869117	7291	3' UTR	175839140	175869167	30028	1	Ctr9
Chr1	175980368	175980564	197	Exon (XR_350614.3/LOC100911864, exon 3 of 3)	175976456	175980662	4207	1	LOC100911864
Chr1	176919925	176929834	9910	Exon (XM_006230045.2/Usp47, exon 19 of 29)	176854589	176937763	83175	1	Usp47
Chr1	176933614	176937019	3406	3' UTR	176854589	176937763	83175	1	Usp47
Chr1	177173281	177173530	250	3' UTR	177048607	177173729	125123	1	Mical2
Chr1	177232424	177232574	151	3' UTR	177183436	177232674	49239	1	Micalcl
Chr1	177407961	177408110	150	3' UTR	177335650	177408160	72511	1	Parva
Chr1	177711950	177712948	999	3' UTR	177495500	177714795	219296	1	Tead1
Chr1	177764524	177764673	150	Exon (XM_017590202.1/Rassf10, exon 1 of 1)	177764177	177769531	5355	1	Rassf10
Chr1	177765218	177765664	447	Exon (XM_017590202.1/Rassf10, exon 1 of 1)	177764177	177769531	5355	1	Rassf10
Chr1	177765763	177766358	596	3' UTR	177764177	177769531	5355	1	Rassf10
Chr1	178929339	178933578	4240	Exon (XM_017589664.1/Spon1, exon 14 of 16)	178568777	178935715	366939	1	Spon1
Chr1	184073378	184077273	3896	3' UTR	184060521	184106604	46084	2	Cyp2r1
Chr1	184077473	184077672	200	3' UTR	184060521	184106604	46084	2	Cyp2r1
Chr1	184276184	184276332	149	3' UTR	184271116	184276480	5365	1	Calcb
Chr1	185483682	185493936	10255	Exon (NM_001144861.1/Plekha7, exon 6 of 8)	185427600	185493985	66386	1	Plekha7
Chr1	186182392	186182892	501	3' UTR	185631702	186186139	554438	1	Sox6
Chr1	187261361	187261661	301	3' UTR	186939698	187264758	325061	1	Xylt1
Chr1	188425747	188429895	4149	Exon (NM_001108501.1/Ccp110, exon 7 of 18)	188417012	188444991	27980	1	Ccp110
Chr1	188689388	188690184	797	3' UTR	188688743	188713280	24538	2	Gprc5b
Chr1	188695154	188695303	150	Exon (XR_001835948.1/LOC102550985, exon 1 of 2)	188688743	188713280	24538	2	Gprc5b
Chr1	189267531	189269524	1994	3' UTR	189240955	189268013	27059	1	Acsm5
Chr1	189458502	189458650	149	3' UTR	189435823	189458799	22977	1	Acsm4
Chr1	189540986	189541134	149	3' UTR	189514504	189541233	26730	1	Acsm3
Chr1	189666340	189685396	19057	5' UTR	189627972	189666440	38469	2	Dcun1d3
Chr1	189685495	189685693	199	3' UTR	189665401	189685836	20436	1	Lyrm1
Chr1	189940843	189940989	147	Exon (NM_001127650.1/Anks4b, exon 1 of 1)	189940305	189942113	1809	1	Anks4b
Chr1	189941331	189941478	148	3' UTR	189940305	189942113	1809	1	Anks4b
Chr1	189941771	189941918	148	3' UTR	189940305	189942113	1809	1	Anks4b
Chr1	190671057	190671756	700	3' UTR	190604613	190671906	67294	1	LOC102547219
Chr1	190836681	190839826	3146	3' UTR	190780211	190839911	59701	1	Eef2k
Chr1	190874025	190881390	7366	3' UTR	190852954	190881539	28586	1	Polr3e
Chr1	190885951	190886097	147	Exon (XR_001835960.1/LOC108349629, exon 2 of 2)	190883490	190886145	2656	1	LOC108349629
Chr1	191472855	191474044	1190	3' UTR	191344979	191474143	129165	1	Hs3st2
Chr1	192026231	192030071	3841	Exon (XM_006230189.3/Ubfd1, exon 2 of 8)	192025453	192040506	15054	1	Ubfd1
Chr1	192031772	192037059	5288	3' UTR	192025453	192040506	15054	1	Ubfd1
Chr1	192088806	192105275	16470	3' UTR	192088709	192105421	16713	1	Dctn5
Chr1	192172302	192172930	629	3' UTR	192169634	192173228	3595	1	Chp2
Chr1	192613816	192701936	88121	Exon (NM_080691.1/Cacng3, exon 1 of 4)	192613766	192708371	94606	1	Cacng3
Chr1	192707873	192708371	499	Exon (NM_080691.1/Cacng3, exon 4 of 4)	192613766	192708371	94606	1	Cacng3
Chr1	192961301	192965061	3761	3' UTR	192933264	192965160	31897	1	Rbbp6
Chr1	193121299	193121548	250	Exon (XM_008759747.2/Tnrc6a, exon 6 of 25)	192991584	193146403	154820	1	Tnrc6a
Chr1	193121647	193123438	1792	Exon (XM_008759747.2/Tnrc6a, exon 6 of 25)	192991584	193146403	154820	1	Tnrc6a
Chr1	193145557	193146254	698	3' UTR	192991584	193146403	154820	1	Tnrc6a
Chr1	196964822	196967071	2250	3' UTR	196942343	196967218	24876	1	Il4r
Chr1	197023437	197023886	450	3' UTR	196996405	197023837	27433	1	Il21r
Chr1	197233653	197234203	551	Exon (XM_006230294.3/LOC361646, exon 15 of 28)	197098621	197264737	166117	1	LOC361646
Chr1	197234303	197241329	7027	Exon (XM_006230294.3/LOC361646, exon 15 of 28)	197098621	197264737	166117	1	LOC361646
Chr1	197839633	197845737	6105	Exon (NM_030585.1/Rabep2, exon 1 of 13)	197839583	197855953	16371	1	Rabep2
Chr1	197852470	197855903	3434	3' UTR	197839583	197855953	16371	1	Rabep2
Chr1	197905901	197907139	1239	3' UTR	197903582	197907189	3608	1	Tufm
Chr1	197999754	198000199	446	Exon (XM_006230319.3/Apobr, exon 2 of 4)	197999209	198003517	4309	1	Apobr
Chr1	198002702	198003196	495	3' UTR	197999209	198003517	4309	1	Apobr
Chr1	198120295	198121015	721	5' UTR	198120104	198121158	1055	1	RGD1565363
Chr1	198213524	198213672	149	3' UTR	198210525	198213816	3292	1	Ypel3
Chr1	198265254	198265498	245	3' UTR	198252208	198265262	13055	1	Fam57b
Chr1	198288215	198288512	298	3' UTR	198282828	198288611	5784	1	Doc2a
Chr1	198298627	198300371	1745	5' UTR	198298138	198301164	3027	1	Hirip3
Chr1	198300469	198301016	548	3' UTR	198298138	198301164	3027	1	Hirip3
Chr1	198403049	198403495	447	3' UTR	198383201	198403544	20344	1	Sez6l2
Chr1	198490292	198490436	145	Exon (XR_001836003.1/LOC108349645, exon 2 of 2)	198489383	198490628	1246	1	LOC108349645
Chr1	198529493	198529642	150	Exon (XM_006230265.3/LOC308990, exon 2 of 2)	198528569	198531585	3017	1	LOC308990
Chr1	198529941	198530090	150	Exon (XM_006230265.3/LOC308990, exon 2 of 2)	198528569	198531585	3017	1	LOC308990
Chr1	198530290	198530638	349	3' UTR	198528569	198531585	3017	1	LOC308990
Chr1	198530838	198530987	150	3' UTR	198528569	198531585	3017	1	LOC308990
Chr1	198682617	198685002	2386	3' UTR	198680428	198685151	4724	1	Znf48
Chr1	198690407	198695005	4599	5' UTR	198694920	198701156	6237	1	Zfp771
Chr1	198700257	198700806	550	Exon (XM_008759932.2/Zfp771, exon 3 of 3)	198689458	198701156	11699	1	Zfp771
Chr1	198925714	198926264	551	5' UTR	198925265	198938939	13675	1	Fbrs
Chr1	198930471	198930710	240	Exon (XM_001080034.5/Fbrs, exon 5 of 18)	198925265	198938939	13675	1	Fbrs
Chr1	198937192	198937741	550	Exon (XM_001080034.5/Fbrs, exon 18 of 18)	198925265	198938939	13675	1	Fbrs
Chr1	198938590	198938789	200	3' UTR	198925265	198938939	13675	1	Fbrs
Chr1	198986969	198987867	899	Exon (XM_017590232.1/Srcap, exon 25 of 34)	198957764	199007576	49813	1	Srcap
Chr1	199003916	199007027	3112	Exon (XM_017590232.1/Srcap, exon 32 of 34)	198957764	199007576	49813	1	Srcap
Chr1	199031277	199032003	727	3' UTR	199019298	199032053	12756	1	Phkg2
Chr1	199044623	199044860	238	Exon (XM_006230219.3/Rnf40, exon 12 of 20)	199037472	199052823	15352	1	Rnf40
Chr1	199044960	199052180	7221	3' UTR	199037472	199052823	15352	1	Rnf40
Chr1	199052278	199052724	447	3' UTR	199037472	199052823	15352	1	Rnf40
Chr1	199193364	199193702	339	Exon (XR_590492.1/LOC102554987, exon 1 of 2)	199192736	199194294	1559	1	LOC102554987
Chr1	199198664	199199863	1200	Exon (XM_006230276.3/Fbxl19, exon 3 of 11)	199196126	199217147	21022	1	Fbxl19
Chr1	199201020	199210108	9089	Exon (XM_006230276.3/Fbxl19, exon 7 of 11)	199196126	199217147	21022	1	Fbxl19
Chr1	199215298	199216401	1104	3' UTR	199196126	199217147	21022	1	Fbxl19
Chr1	199216501	199216849	349	3' UTR	199196126	199217147	21022	1	Fbxl19
Chr1	199221082	199221279	198	Exon (NM_001014024.1/Orai3, exon 2 of 2)	199217504	199222363	4860	1	Orai3
Chr1	199221378	199221920	543	3' UTR	199217504	199222363	4860	1	Orai3
Chr1	199222067	199222215	149	3' UTR	199217504	199222363	4860	1	Orai3
Chr1	199287534	199293744	6211	5' UTR	199287895	199294979	7085	1	Stx4
Chr1	199294657	199295057	401	3' UTR	199287384	199295606	8223	1	Stx4
Chr1	199325003	199326401	1399	Exon (XM_008759938.2/Zfp646, exon 2 of 2)	199321354	199329192	7839	1	Zfp646
Chr1	199326900	199328997	2098	Exon (XM_008759938.2/Zfp646, exon 2 of 2)	199321354	199329192	7839	1	Zfp646
Chr1	199355861	199356153	293	3' UTR	199351628	199356299	4672	1	Bckdk
Chr1	199360694	199362943	2250	Exon (NM_001017378.1/Kat8, exon 1 of 11)	199360645	199372925	12281	1	Kat8
Chr1	199417164	199426605	9442	3' UTR	199412805	199426705	13901	1	Fus
Chr1	199661628	199662370	743	3' UTR	199655069	199662419	7351	1	Armc5
Chr1	199670421	199670670	250	3' UTR	199664039	199670737	6699	1	Tgfb1i1
Chr1	199688185	199688809	625	3' UTR	199687775	199716205	28431	2	RGD1310127
Chr1	199964250	199965092	843	3' UTR	199941258	199965191	23934	1	Bag3
Chr1	200111910	200115529	3620	3' UTR	200037749	200116524	78776	1	Inpp5f
Chr1	200209217	200210213	997	3' UTR	200167075	200210362	43288	1	Sec23ip
Chr1	201281731	201294433	12703	Exon (XM_017589221.1/Tacc2, exon 9 of 26)	201140264	201329612	189349	1	Tacc2
Chr1	201316938	201329463	12526	3' UTR	201140264	201329612	189349	1	Tacc2
Chr1	201472621	201477305	4685	3' UTR	201429716	201478489	48774	1	Plekha1
Chr1	201478426	201479421	996	3' UTR	201429716	201478489	48774	1	Plekha1
Chr1	201542911	201548361	5451	3' UTR	201499067	201548508	49442	1	Htra1
Chr1	201957333	201960464	3132	Exon (NM_001271229.1/Pstk, exon 5 of 6)	201950148	201960563	10416	1	Pstk
Chr1	202019353	202019501	149	Exon (XM_008759867.2/Acadsb, exon 9 of 9)	201981362	202019882	38521	1	Acadsb
Chr1	202497848	202560578	62731	3' UTR	202432366	202560628	128263	1	Plpp4
Chr1	204880156	204885750	5595	3' UTR	204861768	204887344	25577	1	Fam175b
Chr1	204960956	204979996	19041	Exon (XM_006230445.3/Zranb1, exon 3 of 11)	204938444	205000163	61720	1	Zranb1
Chr1	204996595	204998267	1673	3' UTR	204938444	205000163	61720	1	Zranb1
Chr1	204999864	205000113	250	3' UTR	204938444	205000163	61720	1	Zranb1
Chr1	205139427	205139577	151	Exon (XM_017590469.1/LOC103691253, exon 4 of 4)	205136741	205140623	3883	1	LOC103691253
Chr1	205777523	205786572	9050	5' UTR	205755766	205778170	22405	2	Uros
Chr1	211230722	211240067	9346	3' UTR	211205903	211239889	33987	1	Ppp2r2d
Chr1	211298622	211298772	151	5' UTR	211292604	211421023	128420	1	Jakmip3
Chr1	211299271	211299563	293	5' UTR	211292604	211421023	128420	1	Jakmip3
Chr1	211351467	211368633	17167	5' UTR	211292604	211421023	128420	1	Jakmip3
Chr1	211387420	211403822	16403	3' UTR	211292604	211421023	128420	1	Jakmip3
Chr1	211557662	211560428	2767	3' UTR	211543751	211560557	16807	1	Lrrc27
Chr1	211561732	211575525	13794	3' UTR	211544121	211575823	31703	1	Lrrc27
Chr1	211588492	211589739	1248	Exon (XM_006230466.3/Pwwp2b, exon 2 of 3)	211579706	211600710	21005	1	Pwwp2b
Chr1	211589838	211600116	10279	3' UTR	211579706	211600710	21005	1	Pwwp2b
Chr1	211920645	211920844	200	3' UTR	211732163	211920844	188682	1	Inpp5a
Chr1	212176474	212183668	7195	5' UTR	212170190	212213156	42967	1	Adgra1
Chr1	212187787	212210971	23185	Exon (XM_017590242.1/Adgra1, exon 5 of 9)	212170190	212213156	42967	1	Adgra1
Chr1	212211124	212211818	695	3' UTR	212170190	212213156	42967	1	Adgra1
Chr1	212212066	212212561	496	3' UTR	212170190	212213156	42967	1	Adgra1
Chr1	212212859	212213007	149	3' UTR	212170190	212213156	42967	1	Adgra1
Chr1	212243114	212245434	2321	Exon (XM_017590471.1/Kndc1, exon 4 of 34)	212229751	212279254	49504	1	Kndc1
Chr1	212256520	212256768	249	Exon (XM_017590471.1/Kndc1, exon 14 of 34)	212229751	212279254	49504	1	Kndc1
Chr1	212257493	212260048	2556	Exon (XM_017590471.1/Kndc1, exon 15 of 34)	212229751	212279254	49504	1	Kndc1
Chr1	212277614	212278012	399	3' UTR	212229751	212279254	49504	1	Kndc1
Chr1	212278111	212278310	200	3' UTR	212229751	212279254	49504	1	Kndc1
Chr1	212278409	212279204	796	3' UTR	212229751	212279254	49504	1	Kndc1
Chr1	212363402	212363550	149	3' UTR	212359293	212363698	4406	1	Zfp511
Chr1	212594981	212595932	952	Exon (NM_001106311.1/Paox, exon 3 of 8)	212578444	212603722	25279	1	Paox
Chr1	212618642	212619444	803	3' UTR	212606753	212619493	12741	1	Mtg1
Chr1	213606848	213607624	777	Exon (NM_001100520.1/Ric8a, exon 1 of 10)	213606599	213612905	6307	1	Ric8a
Chr1	213612457	213612756	300	3' UTR	213606599	213612905	6307	1	Ric8a
Chr1	213876449	213879889	3441	Exon (NM_001107562.1/B4galnt4, exon 11 of 20)	213870328	213881233	10906	1	B4galnt4
Chr1	214147716	214147962	247	3' UTR	214122989	214148011	25023	1	Ptdss2
Chr1	214204227	214204374	148	Exon (XM_006230539.3/Rassf7, exon 3 of 6)	214202722	214205799	3078	1	Rassf7
Chr1	214204472	214204667	196	Exon (XM_006230539.3/Rassf7, exon 3 of 6)	214202722	214205799	3078	1	Rassf7
Chr1	214244297	214247190	2894	Exon (XM_006230511.3/Phrf1, exon 14 of 18)	214215673	214248902	33230	1	Phrf1
Chr1	214247388	214248757	1370	3' UTR	214215673	214248902	33230	1	Phrf1
Chr1	214326096	214326244	149	Exon (NR_045202.1/Tmem80, exon 5 of 5)	214317300	214326293	8994	1	Tmem80
Chr1	214438645	214439224	580	3' UTR	214434638	214439720	5083	1	Pnpla2
Chr1	214445093	214445530	438	Exon (XM_006230559.3/Cracr2b, exon 8 of 10)	214439810	214445876	6067	1	Cracr2b
Chr1	214691871	214693097	1227	3' UTR	214663929	214693197	29269	1	Muc2
Chr1	214947515	214948060	546	3' UTR	214943522	214949643	6122	1	LOC103691267
Chr1	214949396	214949544	149	3' UTR	214943522	214949643	6122	1	LOC103691267
Chr1	215610573	215610858	286	Exon (NM_017185.1/Tnni2, exon 5 of 8)	215609110	215611652	2543	1	Tnni2
Chr1	215640122	215642557	2436	5' UTR	215642508	215662505	19998	1	Lsp1
Chr1	215652071	215656252	4182	Exon (XM_006230817.3/Lsp1, exon 2 of 11)	215628750	215662505	33756	1	Lsp1
Chr1	216254826	216256461	1636	5' UTR	216254911	216256610	1700	1	Tssc4
Chr1	217033899	217034741	843	3' UTR	217018916	217034890	15975	1	Dhcr7
Chr1	218027167	218028007	841	3' UTR	218024537	218029539	5003	1	Fgf4
Chr1	218076094	218076291	198	5' UTR	218075995	218082698	6704	1	Oraov1
Chr1	218078536	218081170	2635	3' UTR	218075995	218082698	6704	1	Oraov1
Chr1	218474547	218474695	149	Exon (XM_017588842.1/Mrgprf, exon 3 of 3)	218465642	218476228	10587	1	Mrgprf
Chr1	218474992	218476129	1138	3' UTR	218465642	218476228	10587	1	Mrgprf
Chr1	218626132	218628184	2053	3' UTR	218568157	218629679	61523	1	Cpt1a
Chr1	218950610	218954225	3616	5' UTR	218945565	218954274	8710	1	RGD1311946
Chr1	219036893	219048027	11135	3' UTR	219000844	219050211	49368	1	Kmt5b
Chr1	219125972	219126171	200	3' UTR	219076618	219126221	49604	1	Chka
Chr1	219235711	219236168	458	3' UTR	219233712	219236825	3114	1	Acy3
Chr1	219405736	219405982	247	3' UTR	219403970	219406129	2160	1	Ptprcap
Chr1	219859082	219859755	674	3' UTR	219759157	219859844	100688	1	Pc
Chr1	219964579	219965327	749	5' UTR	219965296	220006811	41516	1	Sptbn2
Chr1	219987655	219987805	151	Exon (NM_019167.2/Sptbn2, exon 14 of 37)	219964429	220005076	40648	1	Sptbn2
Chr1	219989946	219991065	1120	Exon (NM_019167.2/Sptbn2, exon 15 of 37)	219964429	220005076	40648	1	Sptbn2
Chr1	219991793	219998673	6881	Exon (NM_019167.2/Sptbn2, exon 17 of 37)	219964429	220005076	40648	1	Sptbn2
Chr1	220001337	220002231	895	Exon (NM_019167.2/Sptbn2, exon 29 of 37)	219964429	220005076	40648	1	Sptbn2
Chr1	220003209	220004063	855	Exon (NM_019167.2/Sptbn2, exon 35 of 37)	219964429	220005076	40648	1	Sptbn2
Chr1	220004268	220004617	350	3' UTR	219964429	220005076	40648	1	Sptbn2
Chr1	220006213	220006661	449	3' UTR	219965296	220006811	41516	1	Sptbn2
Chr1	220009494	220016163	6670	5' UTR	220009397	220019488	10092	1	Rbm4b
Chr1	220018953	220019391	439	3' UTR	220009397	220019488	10092	1	Rbm4b
Chr1	220119357	220119731	375	3' UTR	220114228	220119976	5749	1	Ctsf
Chr1	220142510	220142949	440	3' UTR	220137280	220143387	6108	1	Zdhhc24
Chr1	220143095	220143338	244	3' UTR	220137280	220143387	6108	1	Zdhhc24
Chr1	220243614	220246340	2727	3' UTR	220243469	220246340	2872	1	mrpl11
Chr1	220676862	220678151	1290	3' UTR	220668544	220678300	9757	1	Gal3st3
Chr1	220748591	220750264	1674	3' UTR	220746387	220751687	5301	1	Eif1ad
Chr1	220806710	220808670	1961	3' UTR	220806563	220808817	2255	1	Bles03
Chr1	220861223	220861371	149	3' UTR	220853695	220861420	7726	1	Efemp2
Chr1	220893345	220921185	27841	5' UTR	220893296	220921333	28038	1	LOC102556290
Chr1	220948795	220949095	301	Exon (NM_001271032.1/Ap5b1, exon 2 of 3)	220948318	220952349	4032	1	Ap5b1
Chr1	220949243	220949884	642	Exon (NM_001271032.1/Ap5b1, exon 3 of 3)	220948318	220952349	4032	1	Ap5b1
Chr1	220949982	220950278	297	Exon (NM_001271032.1/Ap5b1, exon 3 of 3)	220948318	220952349	4032	1	Ap5b1
Chr1	220950525	220951955	1431	3' UTR	220948318	220952349	4032	1	Ap5b1
Chr1	220952053	220952201	149	3' UTR	220948318	220952349	4032	1	Ap5b1
Chr1	220966726	220967667	942	3' UTR	220966626	220967717	1092	1	Rnaseh2c
Chr1	221002202	221003199	998	3' UTR	220992770	221003249	10480	1	Rela
Chr1	221043168	221043416	249	5' UTR	221043119	221056420	13302	1	Map3k11
Chr1	221054223	221054421	199	Exon (NM_001013150.1/Map3k11, exon 9 of 10)	221043119	221056420	13302	1	Map3k11
Chr1	221054519	221056371	1853	3' UTR	221043119	221056420	13302	1	Map3k11
Chr1	221115798	221116096	299	3' UTR	221099155	221116090	16936	1	Ltbp3
Chr1	221383226	221384255	1030	Exon (XR_001836073.1/LOC108349685, exon 2 of 3)	221370803	221384387	13585	1	LOC108349685
Chr1	221415330	221415679	350	3' UTR	221409281	221416229	6949	1	Syvn1
Chr1	221415979	221416129	151	3' UTR	221409281	221416229	6949	1	Syvn1
Chr1	221424777	221425565	789	Exon (NM_001107574.1/Znhit2, exon 1 of 1)	221424383	221425664	1282	1	Znhit2
Chr1	221444849	221445043	195	3' UTR	221443477	221445043	1567	1	Tmem262
Chr1	221631414	221632141	728	3' UTR	221612584	221632267	19684	1	Atg2a
Chr1	221664653	221665899	1247	3' UTR	221644867	221667242	22376	1	Ehd1
Chr1	221692819	221693468	650	3' UTR	221673334	221693518	20185	1	Cdc42bpg
Chr1	221708913	221710144	1232	3' UTR	221704394	221710343	5950	1	Men1
Chr1	221772539	221772785	247	5' UTR	221772753	221788755	16003	1	Rasgrp2
Chr1	221788386	221788666	281	3' UTR	221771238	221788755	17518	1	Rasgrp2
Chr1	221884437	221907748	23312	3' UTR	221792191	221908047	115857	1	Nrxn2
Chr1	222199111	222206391	7281	Exon (XM_006230896.3/Bad, exon 2 of 4)	222198516	222207454	8939	1	Bad
Chr1	222229979	222231753	1775	3' UTR	222229835	222231945	2111	1	Ppp1r14b
Chr1	222254206	222255150	945	3' UTR	222254183	222272285	18103	2	Fermt3
Chr1	222311012	222311157	146	5' UTR	222310916	222451485	140570	1	Macrod1
Chr1	222311254	222318839	7586	5' UTR	222310916	222451485	140570	1	Macrod1
Chr1	222671631	222672597	967	5' UTR	222672501	222677372	4872	1	RGD1560108
Chr1	222672796	222673709	914	5' UTR	222669642	222677368	7727	1	RGD1560108
Chr1	222673808	222674190	383	Exon (XM_017589578.1/RGD1560108, exon 3 of 4)	222669642	222677368	7727	1	RGD1560108
Chr1	222674290	222674489	200	Exon (XM_017589578.1/RGD1560108, exon 4 of 4)	222669642	222677368	7727	1	RGD1560108
Chr1	222782692	222785817	3126	Exon (NM_001044241.1/Atl3, exon 9 of 13)	222746023	222786942	40920	1	Atl3
Chr1	222786855	222787449	595	3' UTR	222746023	222786942	40920	1	Atl3
Chr1	222844684	222847354	2671	5' UTR	222847244	222877180	29937	1	Pla2g16
Chr1	222869475	222877130	7656	3' UTR	222844238	222877179	32942	1	Pla2g16
Chr1	224818087	224818383	297	3' UTR	224799444	224818479	19036	1	Slc22a8
Chr1	224832941	224833186	246	3' UTR	224824809	224833284	8476	1	Slc22a6
Chr1	224924153	224924492	340	Exon (NR_131096.1/LOC100912041, exon 11 of 11)	224921300	224924589	3290	1	LOC100912041
Chr1	224949045	224955608	6564	3' UTR	224939497	224955658	16162	1	Stx5
Chr1	224971770	224972068	299	3' UTR	224970807	224972168	1362	1	Tmem223
Chr1	224999084	224999282	199	Exon (XM_006230992.3/Zbtb3, exon 2 of 2)	224998092	225002951	4860	1	Zbtb3
Chr1	224999382	225000323	942	3' UTR	224998092	225002951	4860	1	Zbtb3
Chr1	225015821	225018977	3157	Exon (XM_006231006.2/Hnrnpul2, exon 1 of 12)	225015722	225027351	11630	1	Hnrnpul2
Chr1	225022815	225027006	4192	Exon (XM_006231006.2/Hnrnpul2, exon 10 of 12)	225015722	225027351	11630	1	Hnrnpul2
Chr1	225068336	225070439	2104	Exon (XM_006230975.2/Ubxn1, exon 3 of 10)	225067953	225071944	3992	1	Ubxn1
Chr1	225085357	225087291	1935	3' UTR	225080183	225087291	7109	1	Lbhd1
Chr1	225093464	225095597	2134	Exon (NM_001107576.1/Ints5, exon 2 of 2)	225091612	225096390	4779	1	Ints5
Chr1	225095745	225095894	150	Exon (NM_001107576.1/Ints5, exon 2 of 2)	225091612	225096390	4779	1	Ints5
Chr1	225095993	225096340	348	3' UTR	225091612	225096390	4779	1	Ints5
Chr1	225149086	225149534	449	3' UTR	225140863	225149584	8722	1	Mta2
Chr1	225161509	225162346	838	Exon (NM_001033901.1/Tut1, exon 9 of 9)	225151462	225162445	10984	1	Tut1
Chr1	225207305	225207555	251	Exon (XM_017588752.1/Ahnak, exon 6 of 7)	225184883	225429638	244756	1	Ahnak
Chr1	225209153	225210601	1449	Exon (XM_017588752.1/Ahnak, exon 7 of 7)	225184883	225429638	244756	1	Ahnak
Chr1	225210751	225212899	2149	Exon (XM_017588752.1/Ahnak, exon 7 of 7)	225184883	225429638	244756	1	Ahnak
Chr1	225212999	225213997	999	Exon (XM_017588752.1/Ahnak, exon 7 of 7)	225184883	225429638	244756	1	Ahnak
Chr1	225214347	225214597	251	3' UTR	225184883	225429638	244756	1	Ahnak
Chr1	226080765	226084830	4066	Exon (NM_134411.1/Rab3il1, exon 6 of 9)	225906582	226152181	245600	2	Fads2
Chr1	226495460	226495610	151	3' UTR	226435816	226498008	62193	1	Syt7
Chr1	226584833	226594842	10010	3' UTR	226572399	226596185	23787	1	Cpsf7
Chr1	226682958	226683207	250	3' UTR	226657561	226683356	25796	1	Ddb1
Chr1	226765778	226765977	200	Exon (XM_017590303.1/Vps37c, exon 5 of 9)	226742267	226774109	31843	1	Vps37c
Chr1	226767423	226767771	349	3' UTR	226742267	226774109	31843	1	Vps37c
Chr1	226957901	226958049	149	3' UTR	226947067	226958147	11081	1	Prpf19
Chr1	228142875	228147542	4668	3' UTR	228142778	228147590	4813	1	Mrpl16
Chr1	228421791	228423722	1932	3' UTR	228395237	228425366	30130	1	Osbp
Chr1	228724658	228727471	2814	5' UTR	228724900	228729054	4155	1	Mpeg1
Chr1	228727570	228727817	248	3' UTR	228724559	228729054	4496	1	Mpeg1
Chr1	228727916	228728906	991	3' UTR	228724559	228729054	4496	1	Mpeg1
Chr1	229018940	229019088	149	3' UTR	229003778	229019532	15755	1	Fam111a
Chr1	233581083	233622584	41502	Exon (NM_031036.1/Gnaq, exon 5 of 7)	233382778	233622584	239807	1	Gnaq
Chr1	235346594	235346793	200	3' UTR	235165775	235347986	182212	1	Gna14
Chr1	236311263	236311413	151	3' UTR	236031988	236313858	281871	1	Pcsk5
Chr1	236581463	236581761	299	Exon (XM_006231147.3/Gcnt1, exon 3 of 3)	236547729	236585037	37309	1	Gcnt1
Chr1	236582009	236582158	150	3' UTR	236547729	236585037	37309	1	Gcnt1
Chr1	238042444	238219843	177400	Exon (XR_001836099.1/LOC103695056, exon 1 of 4)	238042544	238045148	2605	2	LOC108349699
Chr1	238848112	238851792	3681	5' UTR	238842506	238854030	11525	1	Zfand5
Chr1	239293424	239299893	6470	3' UTR	239266140	239301133	34994	1	Abhd17b
Chr1	239417699	239418236	538	Exon (XM_006231166.3/Tmem2, exon 3 of 24)	239397322	239474536	77215	1	Tmem2
Chr1	239418336	239418486	151	Exon (XM_006231166.3/Tmem2, exon 4 of 24)	239397322	239474536	77215	1	Tmem2
Chr1	240749963	240756491	6529	3' UTR	239741572	240757583	1016012	1	Trpm3
Chr1	240909073	240933100	24028	3' UTR	240908483	240933198	24716	1	Klf9
Chr1	241554998	241557352	2355	3' UTR	241501679	241557651	55973	1	Ptar1
Chr1	241731361	241731809	449	5' UTR	241594565	241796512	201948	1	Apba1
Chr1	241731958	241732107	150	Exon (NM_031779.2/Apba1, exon 2 of 13)	241594565	241796512	201948	1	Apba1
Chr1	241732206	241761993	29788	Exon (NM_031779.2/Apba1, exon 2 of 13)	241594565	241796512	201948	1	Apba1
Chr1	242572656	242576694	4039	3' UTR	242572558	242577817	5260	1	Tmem252
Chr1	243152475	243153073	599	3' UTR	242934685	243153472	218788	1	Dock8
Chr1	243153173	243153322	150	3' UTR	242934685	243153472	218788	1	Dock8
Chr1	243371347	243371547	201	5' UTR	243371414	243398531	27118	1	Kank1
Chr1	243373480	243373779	300	5' UTR	243201073	243398530	197458	1	Kank1
Chr1	243374128	243375872	1745	Exon (XM_006231214.3/Kank1, exon 5 of 14)	243201073	243398530	197458	1	Kank1
Chr1	243397684	243398083	400	3' UTR	243201073	243398530	197458	1	Kank1
Chr1	243398182	243398481	300	3' UTR	243201073	243398530	197458	1	Kank1
Chr1	243602527	243602826	300	3' UTR	243589607	243602926	13320	1	Dmrt3
Chr1	244657731	244680187	22457	Exon (XR_001835435.1/Smarca2, exon 6 of 32)	244615811	244783736	167926	1	Smarca2
Chr1	244718928	244781496	62569	5' UTR	244754196	244783736	29541	1	Smarca2
Chr1	245268739	245269139	401	3' UTR	245236819	245273688	36870	1	Vldlr
Chr1	245270088	245270288	201	3' UTR	245236819	245273688	36870	1	Vldlr
Chr1	245273288	245273538	251	3' UTR	245236819	245273688	36870	1	Vldlr
Chr1	247034915	247035159	245	3' UTR	246955017	247035159	80143	1	Slc1a1
Chr1	247084621	247085457	837	3' UTR	247084228	247087080	2853	1	Plpp6
Chr1	247085556	247085703	148	3' UTR	247084228	247087080	2853	1	Plpp6
Chr1	247125939	247134351	8413	3' UTR	247110147	247139113	28967	1	Cdc37l1
Chr1	247137575	247138121	547	3' UTR	247110147	247139113	28967	1	Cdc37l1
Chr1	247260322	247272320	11999	3' UTR	247263723	247263819	97	1	Mir101-2
Chr1	247451348	247457521	6174	3' UTR	247398667	247457521	58855	1	Jak2
Chr1	247525197	247526382	1186	Exon (XM_006231248.2/Cd274, exon 2 of 7)	247519890	247539659	19770	1	Cd274
Chr1	247536942	247537090	149	3' UTR	247519890	247539659	19770	1	Cd274
Chr1	247781390	247781737	348	3' UTR	247688778	247784219	95442	1	Ric1
Chr1	248238126	248254977	16852	Exon (NM_001107585.1/Uhrf2, exon 2 of 16)	248228496	248291984	63489	1	Uhrf2
Chr1	248402984	248403223	240	Exon (XM_003749083.3/LOC100361898, exon 1 of 1)	248402889	248403604	716	1	LOC100361898
Chr1	249575004	249576787	1784	5' UTR	249574954	249578520	3567	1	Cstf2t
Chr1	251052330	251070256	17927	3' UTR	251045352	251069818	24467	1	Minpp1
Chr1	251485424	251487634	2211	Exon (NM_031606.1/Pten, exon 8 of 9)	251421814	251487634	65821	1	Pten
Chr1	252490992	252491141	150	5' UTR	252490125	252536113	45989	1	Stambpl1
Chr1	252523311	252527917	4607	Exon (XM_006231297.3/Stambpl1, exon 4 of 12)	252490125	252536113	45989	1	Stambpl1
Chr1	252623072	252623416	345	3' UTR	252589785	252624790	35006	1	Fas
Chr1	252894762	252897812	3051	5' UTR	252894663	252900727	6065	1	Ifit2
Chr1	252897911	252899541	1631	3' UTR	252894663	252900727	6065	1	Ifit2
Chr1	252899640	252899788	149	3' UTR	252894663	252900727	6065	1	Ifit2
Chr1	252900085	252900233	149	3' UTR	252894663	252900727	6065	1	Ifit2
Chr1	252909537	252911029	1493	3' UTR	252906234	252911377	5144	1	Ifit3
Chr1	252944400	252946170	1771	3' UTR	252944105	252946170	2066	1	Ifit1
Chr1	253256276	253260241	3966	Exon (XM_006231281.2/Kif20b, exon 23 of 32)	253220038	253275519	55482	1	Kif20b
Chr1	255650025	255652485	2461	3' UTR	255564247	255654932	90686	1	Btaf1
Chr1	255654483	255654682	200	3' UTR	255564247	255654932	90686	1	Btaf1
Chr1	255861672	255862743	1072	3' UTR	255842642	255864131	21490	1	2022-03-05
Chr1	255862991	255863239	249	3' UTR	255842642	255864131	21490	1	2022-03-05
Chr1	256106659	256106950	292	3' UTR	256101994	256107581	5588	1	Hhex
Chr1	256226285	256255467	29183	5' UTR	256211879	256369318	157440	1	Exoc6
Chr1	256368126	256368424	299	3' UTR	256211879	256369318	157440	1	Exoc6
Chr1	256991720	256996835	5116	Exon (NM_145769.3/Lgi1, exon 7 of 8)	256955944	256996835	40892	1	Lgi1
Chr1	257461193	257463641	2449	3' UTR	257156023	257465440	309418	1	Plce1
Chr1	260171981	260172180	200	5' UTR	260152881	260178360	25480	1	Zfp518a
Chr1	260173127	260173476	350	Exon (XM_008760440.2/Zfp518a, exon 5 of 5)	260152881	260178360	25480	1	Zfp518a
Chr1	260174223	260174373	151	Exon (XM_008760440.2/Zfp518a, exon 5 of 5)	260152881	260178360	25480	1	Zfp518a
Chr1	260174572	260174722	151	Exon (XM_008760440.2/Zfp518a, exon 5 of 5)	260152881	260178360	25480	1	Zfp518a
Chr1	260174821	260175270	450	Exon (XM_008760440.2/Zfp518a, exon 5 of 5)	260152881	260178360	25480	1	Zfp518a
Chr1	260175469	260176117	649	Exon (XM_008760440.2/Zfp518a, exon 5 of 5)	260152881	260178360	25480	1	Zfp518a
Chr1	260176217	260176416	200	Exon (XM_008760440.2/Zfp518a, exon 5 of 5)	260152881	260178360	25480	1	Zfp518a
Chr1	260804088	260804288	201	Exon (XM_008760473.2/Lcor, exon 4 of 4)	260775091	260839549	64459	1	Lcor
Chr1	261073667	261075145	1479	3' UTR	261071965	261075244	3280	1	Frat1
Chr1	261191025	261191324	300	3' UTR	261179971	261191374	11404	1	Zdhhc16
Chr1	261278056	261280199	2144	3' UTR	261229347	261280536	51190	1	Ubtd1
Chr1	261390002	261390447	446	5' UTR	261389804	261393736	3933	1	Marveld1
Chr1	261390893	261392944	2052	5' UTR	261389804	261393736	3933	1	Marveld1
Chr1	261393043	261393340	298	5' UTR	261389804	261393736	3933	1	Marveld1
Chr1	261435265	261435761	497	3' UTR	261415172	261438533	23362	1	Zfyve27
Chr1	261438142	261438440	299	3' UTR	261415172	261438533	23362	1	Zfyve27
Chr1	261802257	261802656	400	Exon (XM_017590486.1/R3hcc1l, exon 2 of 12)	261753295	261833437	80143	1	R3hcc1l
Chr1	261802756	261803955	1200	Exon (XM_017590486.1/R3hcc1l, exon 2 of 12)	261753295	261833437	80143	1	R3hcc1l
Chr1	261831689	261832338	650	3' UTR	261753295	261833437	80143	1	R3hcc1l
Chr1	262027326	262027619	294	Exon (XR_001836358.1/LOC108349471, exon 3 of 3)	262020903	263138299	1117397	2	Hpse2
Chr1	263186695	263210158	23464	Exon (XM_008760426.2/Cnnm1, exon 1 of 11)	263184361	263243912	59552	1	Cnnm1
Chr1	263243515	263243763	249	3' UTR	263184361	263243912	59552	1	Cnnm1
Chr1	263278260	263278610	351	Exon (XR_351092.3/LOC102546432, exon 2 of 2)	263269851	263280158	10308	1	LOC102546432
Chr1	263526015	263526161	147	3' UTR	263511537	263526307	14771	1	Cutc
Chr1	264003694	264003892	199	3' UTR	263968156	264003991	35836	1	LOC681458
Chr1	264263025	264263339	315	Exon (XM_006231442.3/Wnt8b, exon 5 of 6)	264244150	264266136	21987	1	Wnt8b
Chr1	264265637	264265786	150	3' UTR	264244150	264266136	21987	1	Wnt8b
Chr1	264563465	264582781	19317	Exon (XM_008760404.2/Pax2, exon 7 of 10)	264493579	264583222	89644	1	Pax2
Chr1	264583230	264584924	1695	3' UTR	264493579	264585073	91495	1	Pax2
Chr1	264674830	264675030	201	Exon (XM_017589591.1/Slf2, exon 3 of 16)	264670836	264723025	52190	1	Slf2
Chr1	264675430	264682837	7408	Exon (XM_017589591.1/Slf2, exon 3 of 16)	264670836	264723025	52190	1	Slf2
Chr1	264682937	264683137	201	Exon (XM_017589591.1/Slf2, exon 5 of 16)	264670836	264723025	52190	1	Slf2
Chr1	264724824	264730416	5593	3' UTR	264670836	264733465	62630	1	Slf2
Chr1	264751171	264752161	991	3' UTR	264738935	264753399	14465	1	Sema4g
Chr1	264752904	264753349	446	3' UTR	264738935	264753399	14465	1	Sema4g
Chr1	264756110	264758404	2295	5' UTR	264755537	264756404	868	2	Mrpl43
Chr1	264760304	264762842	2539	3' UTR	264756060	264762892	6833	1	Peo1
Chr1	264771149	264773339	2191	Exon (XM_017589508.1/Lzts2, exon 2 of 5)	264765256	264776553	11298	1	Lzts2
Chr1	264774196	264776404	2209	3' UTR	264765256	264776553	11298	1	Lzts2
Chr1	264804174	264804322	149	3' UTR	264796671	264805159	8489	1	Sfxn3
Chr1	264804519	264805060	542	3' UTR	264796671	264805159	8489	1	Sfxn3
Chr1	264830513	264830808	296	3' UTR	264827739	264831152	3414	1	Kazald1
Chr1	265253361	265267869	14509	3' UTR	265100094	265270263	170170	1	Btrc
Chr1	265269216	265269365	150	3' UTR	265100094	265270263	170170	1	Btrc
Chr1	265269465	265270263	799	3' UTR	265100094	265270263	170170	1	Btrc
Chr1	265298971	265317778	18808	5' UTR	265298872	265318513	19642	1	Dpcd
Chr1	265762163	265764329	2167	3' UTR	265761818	265764427	2610	1	Hps6
Chr1	265816650	265817399	750	Exon (XM_006231454.3/Pprc1, exon 5 of 14)	265809892	265826316	16425	1	Pprc1
Chr1	265817749	265818448	700	Exon (XM_006231454.3/Pprc1, exon 5 of 14)	265809892	265826316	16425	1	Pprc1
Chr1	265822397	265823047	651	Exon (XM_006231454.3/Pprc1, exon 9 of 14)	265809892	265826316	16425	1	Pprc1
Chr1	265826069	265826219	151	3' UTR	265809892	265826316	16425	1	Pprc1
Chr1	265829204	265835524	6321	Exon (XM_006231560.3/Nolc1, exon 1 of 13)	265829055	265839819	10765	1	Nolc1
Chr1	265836811	265838631	1821	3' UTR	265829055	265839819	10765	1	Nolc1
Chr1	265839324	265839769	446	3' UTR	265829055	265839819	10765	1	Nolc1
Chr1	266076812	266077973	1162	3' UTR	266075782	266078023	2242	1	Fbxl15
Chr1	266121860	266122309	450	3' UTR	266097293	266122359	25067	1	Mfsd13a
Chr1	266238864	266239112	249	3' UTR	266143766	266241742	97977	1	Sufu
Chr1	266239211	266239360	150	3' UTR	266143766	266241742	97977	1	Sufu
Chr1	266256393	266257188	796	5' UTR	266255797	266270694	14898	1	Trim8
Chr1	266257338	266267765	10428	Exon (NM_001128083.1/Trim8, exon 1 of 6)	266255797	266270694	14898	1	Trim8
Chr1	266268944	266270595	1652	3' UTR	266255797	266270694	14898	1	Trim8
Chr1	266358827	266378161	19335	5' UTR	266378051	266415294	37244	1	Wbp1l
Chr1	266401928	266409971	8044	5' UTR	266358728	266415296	56569	1	Wbp1l
Chr1	266410071	266413507	3437	3' UTR	266358728	266415296	56569	1	Wbp1l
Chr1	266413756	266413954	199	3' UTR	266358728	266415296	56569	1	Wbp1l
Chr1	266414352	266415246	895	3' UTR	266358728	266415296	56569	1	Wbp1l
Chr1	266463109	266463358	250	3' UTR	266451021	266464903	13883	1	Borcs7
Chr1	266531319	266629614	98296	3' UTR	266530421	266627896	97476	1	Cnnm2
Chr1	266629713	266649696	19984	3' UTR	266530477	266649402	118926	1	Cnnm2
Chr1	266793992	266794339	348	3' UTR	266782835	266794389	11555	1	Ina
Chr1	266858763	266859168	406	3' UTR	266844480	266859965	15486	1	Taf5
Chr1	266885571	266891155	5585	Exon (NM_001107604.2/Pdcd11, exon 18 of 36)	266866931	266908042	41112	1	Pdcd11
Chr1	266901096	266904381	3286	Exon (NM_001107604.2/Pdcd11, exon 27 of 36)	266866931	266908042	41112	1	Pdcd11
Chr1	266905709	266907144	1436	3' UTR	266866931	266908042	41112	1	Pdcd11
Chr1	267036935	267037085	151	Exon (XM_006231510.3/Neurl1, exon 6 of 6)	266953006	267038879	85874	1	Neurl1
Chr1	267389871	267399279	9409	Exon (XM_006231558.3/Slk, exon 8 of 19)	267359761	267415735	55975	1	Slk
Chr1	267405756	267412551	6796	Exon (XM_006231558.3/Slk, exon 14 of 19)	267359761	267415735	55975	1	Slk
Chr1	267505539	267508858	3320	5' UTR	267505336	267509350	4015	1	Sfr1
Chr1	274254309	274257263	2955	Exon (NM_133578.1/Dusp5, exon 3 of 4)	274245184	274258595	13412	1	Dusp5
Chr1	274258200	274258348	149	3' UTR	274245184	274258595	13412	1	Dusp5
Chr1	274328411	274338699	10289	Exon (NM_031583.2/Smc3, exon 8 of 29)	274310120	274352856	42737	1	Smc3
Chr1	274343334	274349565	6232	Exon (NM_031583.2/Smc3, exon 19 of 29)	274310120	274352856	42737	1	Smc3
Chr1	274349800	274350240	441	Exon (NM_031583.2/Smc3, exon 25 of 29)	274310120	274352856	42737	1	Smc3
Chr1	274625258	274625813	556	5' UTR	274625703	274648204	22502	1	Pdcd4
Chr1	274629031	274634589	5559	Exon (XM_017589648.1/Pdcd4, exon 2 of 12)	274616625	274648204	31580	1	Pdcd4
Chr1	274700671	274701469	799	5' UTR	274700621	274751195	50575	1	Shoc2
Chr1	274767315	274768051	737	3' UTR	274766283	274769083	2801	1	Adra2a
Chr1	274768297	274768690	394	3' UTR	274766283	274769083	2801	1	Adra2a
Chr1	276287717	276289962	2246	3' UTR	276240703	276290006	49304	1	Acsl5
Chr1	277537875	277538164	290	Exon (NM_012701.1/Adrb1, exon 1 of 1)	277537585	277538985	1401	1	Adrb1
Chr1	277538357	277538599	243	Exon (NM_012701.1/Adrb1, exon 1 of 1)	277537585	277538985	1401	1	Adrb1
Chr1	278221305	278221934	630	3' UTR	278198181	278224365	26185	1	Fam160b1
Chr1	278412735	278415975	3241	3' UTR	278311362	278418347	106986	1	Trub1
Chr1	278900757	279097389	196633	3' UTR	278546113	279098977	552865	1	Atrnl1
Chr1	279097538	279097985	448	3' UTR	278546113	279098977	552865	1	Atrnl1
Chr1	279098084	279098332	249	3' UTR	278546113	279098977	552865	1	Atrnl1
Chr1	279775370	279775519	150	Exon (XR_001836185.1/LOC108349706, exon 2 of 3)	279772624	279780862	8239	1	LOC108349706
Chr1	280121041	280124908	3868	Exon (XM_006231669.3/Eno4, exon 11 of 14)	280120625	280122136	1512	2	LOC103691387
Chr1	280126661	280126910	250	3' UTR	280097061	280129404	32344	1	Eno4
Chr1	282135725	282135925	201	3' UTR	282134676	282140370	5695	1	Nanos1
Chr1	282456607	282462649	6043	3' UTR	282265371	282467842	202472	1	Grk5
Chr1	282463897	282464297	401	3' UTR	282265371	282467842	202472	1	Grk5
Chr1	282465046	282465895	850	3' UTR	282265371	282467842	202472	1	Grk5
Chr1	282466943	282467293	351	3' UTR	282265371	282467842	202472	1	Grk5
Chr1	1870136	1872493	2358	3' UTR	1870039	1881858	11820	2	Ginm1
Chr1	1999624	2004425	4802	3' UTR	1999574	2017574	18001	2	Tab2
Chr1	2005365	2017524	12160	5' UTR	1999574	2017574	18001	2	Tab2
Chr1	2333770	2425910	92141	3' UTR	2334237	2356752	22516	1	LOC108348767
Chr1	2783005	2783204	200	3' UTR	2782905	2950749	167845	2	Sash1
Chr1	2785198	2791110	5913	3' UTR	2782905	2950749	167845	2	Sash1
Chr1	2794953	2800706	5754	Exon (XM_003748645.4/Sash1, exon 17 of 21)	2782905	2950749	167845	2	Sash1
Chr1	3861214	3868760	7547	3' UTR	3858917	4011684	152768	2	Stxbp5
Chr1	4753590	4753839	250	3' UTR	4753141	5165809	412669	2	Grm1
Chr1	4754787	4755584	798	3' UTR	4753141	5165809	412669	2	Grm1
Chr1	4755784	4756282	499	3' UTR	4753141	5165809	412669	2	Grm1
Chr1	4756582	4786049	29468	3' UTR	4753141	5165809	412669	2	Grm1
Chr1	4786149	4786747	599	Exon (XM_017588777.1/Grm1, exon 8 of 9)	4753141	5165809	412669	2	Grm1
Chr1	6826386	6827691	1306	Exon (XM_017588826.1/Utrn, exon 3 of 67)	6451809	6832770	380962	2	Utrn
Chr1	7039554	7039800	247	3' UTR	7039160	7064870	25711	2	Stx11
Chr1	7039899	7040244	346	3' UTR	7039160	7064870	25711	2	Stx11
Chr1	7269750	7270040	291	3' UTR	7258937	7270185	11249	2	LOC108349486
Chr1	7323239	7323726	488	3' UTR	7323043	7335766	12724	2	Ltv1
Chr1	7354638	7385784	31147	3' UTR	7352050	7481719	129670	2	Phactr2
Chr1	7685854	7698508	12655	3' UTR	7685209	7726238	41030	2	Pex3
Chr1	7816891	7817291	401	3' UTR	7816841	8038609	221769	2	Aig1
Chr1	7817696	7817896	201	3' UTR	7816841	8038609	221769	2	Aig1
Chr1	7822793	7823042	250	3' UTR	7816841	8038609	221769	2	Aig1
Chr1	8595486	8599638	4153	3' UTR	8593342	8751539	158198	2	Adgrg6
Chr1	8654538	8654887	350	Exon (XM_218313.9/Adgrg6, exon 4 of 25)	8593342	8751539	158198	2	Adgrg6
Chr1	13037308	13037508	201	3' UTR	13036909	13050644	13736	2	Heca
Chr1	13039805	13040204	400	3' UTR	13036909	13050644	13736	2	Heca
Chr1	13049695	13050544	850	5' UTR	13036909	13050644	13736	2	Heca
Chr1	13384302	13387978	3677	3' UTR	13384153	13395370	11218	2	Ccdc28a
Chr1	13391020	13395303	4284	5' UTR	13384153	13395370	11218	2	Ccdc28a
Chr1	13714537	13714735	199	3' UTR	13713152	13719970	6819	2	Hebp2
Chr1	14402149	14402299	151	3' UTR	14401103	14412822	11720	2	Tnfaip3
Chr1	14402398	14403146	749	3' UTR	14401103	14412822	11720	2	Tnfaip3
Chr1	14404735	14405482	748	Exon (XM_003748656.3/Tnfaip3, exon 6 of 8)	14401103	14412822	11720	2	Tnfaip3
Chr1	15299165	15300248	1084	3' UTR	15298526	15301998	3473	2	Slc35d3
Chr1	15890841	15891040	200	3' UTR	15889845	15975193	85349	2	Pde7b
Chr1	15892584	15893331	748	3' UTR	15889845	15975193	85349	2	Pde7b
Chr1	15893431	15893680	250	3' UTR	15889845	15975193	85349	2	Pde7b
Chr1	15893779	15901300	7522	3' UTR	15889845	15975193	85349	2	Pde7b
Chr1	19227265	19258992	31728	3' UTR	19227115	19329567	102453	2	Arhgap18
Chr1	20902813	20903610	798	Exon (XM_017589845.1/Epb41l2, exon 17 of 23)	20881820	20966788	84969	2	Epb41l2
Chr1	20961402	20962530	1129	5' UTR	20881820	20966788	84969	2	Epb41l2
Chr1	23234025	23234168	144	Exon (XR_349895.3/LOC102554376, exon 2 of 2)	23233930	23235209	1280	2	LOC102554376
Chr1	24005659	24014516	8858	3' UTR	24003625	24056373	52749	2	Slc2a12
Chr1	24036722	24036921	200	Exon (NM_001107451.1/Slc2a12, exon 2 of 5)	24003625	24056373	52749	2	Slc2a12
Chr1	24984096	24984542	447	5' UTR	24887945	24984818	96874	2	LOC679711
Chr1	28579806	28600017	20212	3' UTR	28567447	28600116	32670	2	Hddc2
Chr1	30875256	30906400	31145	Exon (XM_006227746.2/Echdc1, exon 3 of 6)	30874410	30918172	43763	2	Echdc1
Chr1	30915792	30917803	2012	5' UTR	30874410	30918172	43763	2	Echdc1
Chr1	31041822	31049541	7720	3' UTR	31040142	31055453	15312	2	Soga3
Chr1	31539436	31545473	6038	5' UTR	31538088	31545573	7486	2	Ccdc127
Chr1	31733493	31733940	448	3' UTR	31731652	31777144	45493	2	Slc9a3
Chr1	31735333	31735632	300	3' UTR	31731652	31777144	45493	2	Slc9a3
Chr1	31869196	31890168	20973	5' UTR	31866755	31890442	23688	2	Tppp
Chr1	31939712	31939961	250	3' UTR	31939612	31967859	28248	2	Brd9
Chr1	31966668	31967190	523	Exon (NM_001107453.1/Brd9, exon 2 of 16)	31939612	31967859	28248	2	Brd9
Chr1	32086904	32087302	399	3' UTR	32086755	32140137	53383	2	Slc12a7
Chr1	32087601	32088248	648	3' UTR	32086755	32140137	53383	2	Slc12a7
Chr1	32088348	32092720	4373	3' UTR	32086755	32140137	53383	2	Slc12a7
Chr1	32379530	32379727	198	3' UTR	32379431	32429917	50487	2	Lpcat1
Chr1	32380320	32384921	4602	3' UTR	32379431	32429917	50487	2	Lpcat1
Chr1	32634924	32635124	201	3' UTR	32634774	32638672	3899	2	Irx4
Chr1	33272692	33272942	251	Exon (XM_008758689.2/Irx2, exon 3 of 4)	33270388	33275868	5481	2	Irx2
Chr1	33273041	33273341	301	Exon (XM_008758689.2/Irx2, exon 3 of 4)	33270388	33275868	5481	2	Irx2
Chr1	36107588	36112841	5254	3' UTR	36107249	36112909	5661	2	Med10
Chr1	37702282	37725873	23592	3' UTR	37702041	37726162	24122	2	RGD1308544
Chr1	37740509	37741692	1184	5' UTR	37734400	37742907	8508	2	Fastkd3
Chr1	37927267	37929151	1885	3' UTR	37927069	37937920	10852	2	LOC102547287
Chr1	37950420	37951216	797	3' UTR	37947138	37964418	17281	2	LOC102549842
Chr1	37951514	37951664	151	3' UTR	37947138	37964418	17281	2	LOC102549842
Chr1	37951813	37953305	1493	3' UTR	37947138	37964418	17281	2	LOC102549842
Chr1	37953404	37953951	548	Exon (XM_008758701.2/LOC102549842, exon 4 of 4)	37947138	37964418	17281	2	LOC102549842
Chr1	37954051	37954200	150	Exon (XM_008758701.2/LOC102549842, exon 4 of 4)	37947138	37964418	17281	2	LOC102549842
Chr1	37977383	37978378	996	3' UTR	37977333	38009465	32133	2	Zfp748
Chr1	37978528	37979324	797	3' UTR	37977333	38009465	32133	2	Zfp748
Chr1	37979623	37980170	548	Exon (XM_017590418.1/Zfp748, exon 8 of 8)	37977333	38009465	32133	2	Zfp748
Chr1	38525900	38526298	399	3' UTR	38525850	38543402	17553	2	LOC102551340
Chr1	38527046	38528192	1147	3' UTR	38525850	38543402	17553	2	LOC102551340
Chr1	40915605	40916591	987	3' UTR	40914175	40921442	7268	2	Zbtb2
Chr1	40948893	40955457	6565	3' UTR	40948843	40981523	32681	2	Rmnd1
Chr1	40972468	40980892	8425	5' UTR	40949478	40972816	23339	2	Rmnd1
Chr1	41608436	41608586	151	3' UTR	41608287	41655449	47163	2	Syne1
Chr1	41731589	41738159	6571	Exon (XM_008758713.2/Syne1, exon 7 of 56)	41608287	41763591	155305	2	Syne1
Chr1	42461815	42463551	1737	Exon (NM_001106206.1/Fbxo5, exon 3 of 5)	42461277	42467646	6370	2	Fbxo5
Chr1	42464179	42464326	148	Exon (NM_001106206.1/Fbxo5, exon 2 of 5)	42461277	42467646	6370	2	Fbxo5
Chr1	42464423	42464668	246	Exon (NM_001106206.1/Fbxo5, exon 2 of 5)	42461277	42467646	6370	2	Fbxo5
Chr1	42475840	42479803	3964	Exon (NM_001025723.1/Mtrf1l, exon 4 of 7)	42475791	42485999	10209	2	Mtrf1l
Chr1	42493838	42493986	149	3' UTR	42491566	42587368	95803	2	Rgs17
Chr1	43567987	43577001	9015	3' UTR	43563457	43637729	74273	2	Ipcef1
Chr1	43789847	43790096	250	3' UTR	43789797	43863444	73648	2	Cnksr3
Chr1	43791639	43798376	6738	3' UTR	43789797	43863444	73648	2	Cnksr3
Chr1	44433165	44435616	2452	3' UTR	44433116	44474674	41559	2	Tfb1m
Chr1	46302839	46322880	20042	5' UTR	46307853	46309276	1424	2	Ldhal6b
Chr1	46937138	46937487	350	3' UTR	46934499	46978263	43765	2	Serac1
Chr1	46998882	46999129	248	Exon (XR_349992.3/LOC102551377, exon 2 of 2)	46998388	47003987	5600	2	LOC102551377
Chr1	47002092	47002240	149	Exon (XR_349992.3/LOC102551377, exon 2 of 2)	46998388	47003987	5600	2	LOC102551377
Chr1	47288571	47296021	7451	3' UTR	47287872	47331412	43541	2	Ezr
Chr1	47440551	47441269	719	Exon (XM_008758742.2/Rsph3, exon 7 of 9)	47412151	47478924	66774	2	Rsph3
Chr1	47445641	47446708	1068	Exon (XM_008758742.2/Rsph3, exon 4 of 9)	47412151	47478924	66774	2	Rsph3
Chr1	47494734	47495528	795	Exon (NM_001309449.1/Tagap, exon 9 of 9)	47493990	47502020	8031	2	Tagap
Chr1	48718577	48718726	150	3' UTR	48716094	48798471	82378	2	Agpat4
Chr1	48719670	48724151	4482	3' UTR	48716094	48798471	82378	2	Agpat4
Chr1	51525420	51525618	199	Exon (XR_350014.3/LOC102549608, exon 1 of 3)	51517479	51526114	8636	2	LOC102549608
Chr1	52360346	52360496	151	3' UTR	52360296	52544448	184153	2	Pde10a
Chr1	52991336	52991921	586	Exon (XM_017589342.1/Prr18, exon 2 of 2)	52989076	52992857	3782	2	Prr18
Chr1	53122380	53123180	801	3' UTR	53122330	53152872	30543	2	Fgfr1op
Chr1	53519973	53520213	241	Exon (NM_001169132.1/Gpr31, exon 1 of 1)	53519829	53520788	960	2	Gpr31
Chr1	53520596	53520788	193	Exon (NM_001169132.1/Gpr31, exon 1 of 1)	53519829	53520788	960	2	Gpr31
Chr1	53720250	53734375	14126	Exon (NM_013217.2/Afdn, exon 43 of 49)	53713873	53861918	148046	2	Afdn
Chr1	54055907	54056286	380	Exon (XR_350039.3/LOC102552087, exon 2 of 3)	54055711	54057169	1459	2	LOC102552087
Chr1	56159485	56160034	550	3' UTR	56159435	56166755	7321	2	Dact2
Chr1	56160133	56160433	301	Exon (XM_008758760.1/Dact2, exon 4 of 4)	56159435	56166755	7321	2	Dact2
Chr1	56160532	56161081	550	Exon (XM_008758760.1/Dact2, exon 4 of 4)	56159435	56166755	7321	2	Dact2
Chr1	56161281	56161430	150	Exon (XM_008758760.1/Dact2, exon 4 of 4)	56159435	56166755	7321	2	Dact2
Chr1	56679264	56679413	150	Exon (NM_001169138.1/Thbs2, exon 3 of 22)	56653929	56683571	29643	2	Thbs2
Chr1	56951566	56952722	1157	3' UTR	56949712	56952434	2723	1	LOC100125364
Chr1	57318967	57319264	298	3' UTR	57318621	57326732	8112	2	Dll1
Chr1	57319459	57319918	460	Exon (NM_032063.2/Dll1, exon 9 of 11)	57318621	57326732	8112	2	Dll1
Chr1	57470926	57482772	11847	3' UTR	57470878	57491359	20482	2	Psmb1
Chr1	57513017	57514263	1247	3' UTR	57512968	57518458	5491	2	Pdcd2
Chr1	57533749	57534143	395	3' UTR	57533602	57555048	21447	2	Prdm9
Chr1	57534487	57534880	394	Exon (NM_001108903.2/Prdm9, exon 11 of 11)	57533602	57555048	21447	2	Prdm9
Chr1	57794096	57794246	151	3' UTR	57794046	57815495	21450	2	Rgmb
Chr1	57796744	57810053	13310	Exon (XM_017589903.1/Rgmb, exon 2 of 3)	57794046	57815495	21450	2	Rgmb
Chr1	57814963	57815213	251	5' UTR	57794046	57815495	21450	2	Rgmb
Chr1	62112301	62112450	150	3' UTR	62103896	62119267	15372	2	LOC102555644
Chr1	62112748	62112898	151	3' UTR	62103896	62119267	15372	2	LOC102555644
Chr1	62113893	62114241	349	Exon (XM_008758832.2/LOC102555644, exon 3 of 3)	62103896	62119267	15372	2	LOC102555644
Chr1	62314820	62315119	300	Exon (XM_006228099.3/Zfp945, exon 5 of 5)	62313127	62362694	49568	2	Zfp945
Chr1	62315716	62315965	250	Exon (XM_006228099.3/Zfp945, exon 5 of 5)	62313127	62362694	49568	2	Zfp945
Chr1	62316065	62316214	150	Exon (XM_006228099.3/Zfp945, exon 5 of 5)	62313127	62362694	49568	2	Zfp945
Chr1	62316314	62330299	13986	Exon (XM_006228099.3/Zfp945, exon 4 of 5)	62313127	62362694	49568	2	Zfp945
Chr1	62555285	62556776	1492	3' UTR	62555186	62577749	22564	2	Zfp40
Chr1	64029317	64029597	281	Exon (XM_006228017.3/Tsen34, exon 3 of 5)	64023924	64030880	6957	2	Tsen34
Chr1	64131120	64132497	1378	3' UTR	64130823	64147066	16244	2	Cnot3
Chr1	64151424	64153662	2239	3' UTR	64150786	64162461	11676	2	Prpf31
Chr1	64161571	64162412	842	5' UTR	64150786	64162461	11676	2	Prpf31
Chr1	64330349	64350338	19990	Exon (NM_080696.2/Cacng8, exon 1 of 4)	64330106	64350338	20233	2	Cacng8
Chr1	64374796	64375591	796	3' UTR	64374547	64405380	30834	2	Cacng7
Chr1	64407197	64407495	299	3' UTR	64407098	64433698	26601	2	Prkcg
Chr1	64440138	64446767	6630	5' UTR	64438465	64448332	9868	2	Myadm
Chr1	64720954	64721495	542	Exon (XR_001835647.1/LOC103691005, exon 2 of 4)	64721333	64732435	11103	1	LOC103691005
Chr1	65154357	65165686	11330	Exon (XR_350107.2/LOC102549498, exon 1 of 2)	65154260	65166169	11910	2	LOC102549498
Chr1	65567913	65568208	296	3' UTR	65567864	65570607	2744	2	LOC108348450
Chr1	65596210	65596902	693	3' UTR	65595518	65601637	6120	2	Zfp446
Chr1	65605876	65606618	743	3' UTR	65604342	65612196	7855	2	Zfp324
Chr1	65607459	65608741	1283	5' UTR	65604342	65612196	7855	2	Zfp324
Chr1	65657364	65657514	151	3' UTR	65656265	65660272	4008	2	Rnf225
Chr1	65657713	65657913	201	3' UTR	65656265	65660272	4008	2	Rnf225
Chr1	65676981	65681112	4132	3' UTR	65675932	65702955	27024	2	Zfp128
Chr1	65693392	65694691	1300	Exon (XM_017590426.1/Zfp128, exon 3 of 6)	65675932	65702955	27024	2	Zfp128
Chr1	65741819	65742513	695	3' UTR	65741769	65757002	15234	2	Zfp110
Chr1	65743059	65743406	348	Exon (NM_001024775.1/Zfp110, exon 8 of 8)	65741769	65757002	15234	2	Zfp110
Chr1	66187619	66189244	1626	3' UTR	66182586	66213179	30594	2	LOC691722
Chr1	66231578	66237070	5493	3' UTR	66229845	66255046	25202	2	Zfp606
Chr1	69737003	69737149	147	3' UTR	69736905	69743616	6712	2	Zfp978
Chr1	69737247	69737442	196	Exon (NM_001025677.1/Zfp978, exon 4 of 4)	69736905	69743616	6712	2	Zfp978
Chr1	69737686	69740021	2336	5' UTR	69736905	69743616	6712	2	Zfp978
Chr1	69858848	69866362	7515	5' UTR	69865593	69879897	14305	1	LOC102547412
Chr1	69966615	69967656	1042	3' UTR	69966566	69976411	9846	2	LOC103691033
Chr1	69991667	69992565	899	3' UTR	69978542	69992237	13696	1	LOC103690204
Chr1	69992665	69994911	2247	5' UTR	69988673	70042015	53343	2	Usp29
Chr1	70170648	70170996	349	Exon (XR_350134.2/LOC102547903, exon 4 of 4)	70017371	70210682	193312	2	LOC102547903
Chr1	70210087	70210585	499	Exon (XR_001835666.1/LOC102547903, exon 1 of 4)	70017371	70210682	193312	2	LOC102547903
Chr1	71114123	71114322	200	3' UTR	71114024	71125464	11441	2	Smim17
Chr1	71167347	71167942	596	3' UTR	71167198	71173024	5827	2	Zfp28
Chr1	71168041	71168190	150	Exon (XM_006228207.2/Zfp28, exon 6 of 6)	71167198	71173024	5827	2	Zfp28
Chr1	71168438	71168885	448	Exon (XM_006228207.2/Zfp28, exon 6 of 6)	71167198	71173024	5827	2	Zfp28
Chr1	71170061	71171659	1599	Exon (XM_006228207.2/Zfp28, exon 3 of 6)	71167198	71173024	5827	2	Zfp28
Chr1	71183215	71183514	300	Exon (XM_017589958.1/Zfp78, exon 5 of 5)	71183115	71196978	13864	2	Zfp78
Chr1	71183713	71184012	300	Exon (XM_017589958.1/Zfp78, exon 5 of 5)	71183115	71196978	13864	2	Zfp78
Chr1	71184312	71187327	3016	Exon (XM_017589958.1/Zfp78, exon 4 of 5)	71183115	71196978	13864	2	Zfp78
Chr1	71207173	71207324	152	Exon (XM_017589959.1/LOC102548162, exon 6 of 10)	71206073	71228209	22137	2	LOC102548162
Chr1	71207473	71207623	151	Exon (XM_017589959.1/LOC102548162, exon 6 of 10)	71206073	71228209	22137	2	LOC102548162
Chr1	71207773	71207922	150	Exon (XM_017589959.1/LOC102548162, exon 5 of 10)	71206073	71228209	22137	2	LOC102548162
Chr1	71270649	71270799	151	3' UTR	71270101	71290261	20161	2	Zfp667
Chr1	71271347	71272194	848	3' UTR	71270101	71290261	20161	2	Zfp667
Chr1	71272344	71272643	300	Exon (XM_006228189.3/Zfp667, exon 5 of 5)	71270101	71290261	20161	2	Zfp667
Chr1	71381598	71381845	248	3' UTR	71380856	71399832	18977	2	Zfp444
Chr1	72312407	72312701	295	3' UTR	72312260	72329828	17569	2	U2af2
Chr1	72329681	72329828	148	5' UTR	72312260	72329828	17569	2	U2af2
Chr1	72331282	72331926	645	3' UTR	72331232	72338373	7142	2	Ccdc106
Chr1	72332075	72332223	149	Exon (XM_017589968.1/Ccdc106, exon 5 of 5)	72331232	72338373	7142	2	Ccdc106
Chr1	72332372	72333925	1554	Exon (XM_017589965.1/Ccdc106, exon 5 of 7)	72331232	72338373	7142	2	Ccdc106
Chr1	72338516	72338707	192	3' UTR	72338468	72340636	2169	2	Zfp580
Chr1	72362292	72363433	1142	3' UTR	72362242	72367020	4779	2	LOC100911196
Chr1	72363879	72364623	745	Exon (XM_008759010.1/LOC100911196, exon 1 of 2)	72362242	72367020	4779	2	LOC100911196
Chr1	72364723	72365368	646	Exon (XM_008759010.1/LOC100911196, exon 1 of 2)	72362242	72367020	4779	2	LOC100911196
Chr1	72365467	72366261	795	Exon (XM_008759010.1/LOC100911196, exon 1 of 2)	72362242	72367020	4779	2	LOC100911196
Chr1	72376480	72377171	692	Exon (XM_008758958.2/Zfp524, exon 2 of 2)	72376381	72379588	3208	2	Zfp524
Chr1	72443849	72444197	349	Exon (XM_017589109.1/Ssc5d, exon 14 of 14)	72443750	72461382	17633	2	Ssc5d
Chr1	72444296	72445935	1640	Exon (XM_017589109.1/Ssc5d, exon 13 of 14)	72443750	72461382	17633	2	Ssc5d
Chr1	72451336	72452049	714	Exon (XM_017589109.1/Ssc5d, exon 10 of 14)	72443750	72461382	17633	2	Ssc5d
Chr1	72462501	72463089	589	3' UTR	72462403	72464550	2148	2	Nat14
Chr1	72465503	72467493	1991	3' UTR	72465403	72474442	9040	2	Zfp628
Chr1	72467593	72467742	150	Exon (XM_006228303.3/Zfp628, exon 2 of 2)	72465403	72474442	9040	2	Zfp628
Chr1	72467841	72468289	449	Exon (XM_006228303.3/Zfp628, exon 2 of 2)	72465403	72474442	9040	2	Zfp628
Chr1	72491716	72495536	3821	3' UTR	72491667	72509433	17767	2	LOC684270
Chr1	72629806	72630005	200	3' UTR	72629706	72633423	3718	2	Tmem190
Chr1	72666712	72667111	400	3' UTR	72666662	72674110	7449	2	Kmt5c
Chr1	73394195	73395659	1465	3' UTR	73393854	73399447	5594	2	Lilrb4
Chr1	73659718	73660151	434	Exon (XM_006228225.3/Lilra5, exon 2 of 5)	73655767	73660847	5081	2	Lilra5
Chr1	73722734	73723629	896	3' UTR	73722088	73733788	11701	2	Leng8
Chr1	73736360	73736510	151	3' UTR	73734614	73753157	18544	2	Ttyh1
Chr1	75335233	75337512	2280	3' UTR	75335183	75355532	20350	2	RGD1310257
Chr1	75337710	75337859	150	Exon (XM_017589983.1/RGD1310257, exon 4 of 4)	75335183	75355532	20350	2	RGD1310257
Chr1	75347268	75354568	7301	Exon (XM_017589983.1/RGD1310257, exon 2 of 4)	75335183	75355532	20350	2	RGD1310257
Chr1	77847648	77850595	2948	3' UTR	77847599	77865870	18272	2	Ehd2
Chr1	77869169	77872731	3563	3' UTR	77872647	77874332	1686	1	LOC103691043
Chr1	77885469	77885915	447	Exon (NM_001106226.2/Gltscr1, exon 4 of 13)	77869020	77893509	24490	2	Gltscr1
Chr1	78110074	78110665	592	5' UTR	78069260	78112488	43229	2	Dhx34
Chr1	78166743	78166942	200	3' UTR	78165155	78180781	15627	2	C5ar2
Chr1	78187458	78187848	391	Exon (NM_053619.1/C5ar1, exon 2 of 2)	78186777	78195132	8356	2	C5ar1
Chr1	78188188	78188334	147	Exon (NM_053619.1/C5ar1, exon 2 of 2)	78186777	78195132	8356	2	C5ar1
Chr1	78211707	78212350	644	5' UTR	78210866	78212350	1485	2	Inafm1
Chr1	78212983	78214966	1984	3' UTR	78212933	78225641	12709	2	Ccdc9
Chr1	78217220	78224997	7778	5' UTR	78212933	78225641	12709	2	Ccdc9
Chr1	78277971	78278368	398	3' UTR	78277524	78333281	55758	2	Sae1
Chr1	78458759	78527934	69176	5' UTR	78456409	78573374	116966	2	Arhgap35
Chr1	78734252	78735340	1089	3' UTR	78733461	78740803	7343	2	Fkrp
Chr1	78735587	78736082	496	Exon (XM_006228414.3/Fkrp, exon 3 of 3)	78733461	78740803	7343	2	Fkrp
Chr1	78944152	78944299	148	3' UTR	78944054	78968361	24308	2	Ppp5c
Chr1	80047025	80054218	7194	3' UTR	80046975	80057022	10048	2	Qpctl
Chr1	80063441	80063836	396	3' UTR	80063047	80073147	10101	2	Gipr
Chr1	80064033	80064230	198	3' UTR	80063047	80073147	10101	2	Gipr
Chr1	80268023	80269217	1195	3' UTR	80267725	80271001	3277	2	Cd3eap
Chr1	80306224	80307545	1322	3' UTR	80293574	80307334	13761	1	Ercc2
Chr1	80335866	80336315	450	3' UTR	80335517	80367313	31797	2	Mark4
Chr1	80415410	80415954	545	3' UTR	80414766	80417368	2603	2	Bloc1s3
Chr1	80416053	80417088	1036	5' UTR	80414766	80417368	2603	2	Bloc1s3
Chr1	80440116	80441672	1557	3' UTR	80439718	80471527	31810	2	Ppp1r37
Chr1	80474015	80474706	692	3' UTR	80473966	80483487	9522	2	Gemin7
Chr1	80491569	80495076	3508	3' UTR	80491520	80515694	24175	2	Clasrp
Chr1	80499025	80505601	6577	Exon (NM_001024294.1/Clasrp, exon 5 of 21)	80491520	80515694	24175	2	Clasrp
Chr1	80506407	80514523	8117	Exon (NM_001024294.1/Clasrp, exon 2 of 21)	80513171	80514442	1272	2	LOC108348935
Chr1	80549149	80549738	590	3' UTR	80549051	80580665	31615	2	Clptm1
Chr1	80609296	80609954	659	5' UTR	80606634	80609954	3321	2	Apoc1
Chr1	80613488	80613686	199	Exon (NM_001270684.1/Apoe, exon 4 of 4)	80612894	80615525	2632	2	Apoe
Chr1	80639733	80646517	6785	3' UTR	80631449	80666585	35137	2	Nectin2
Chr1	80730907	80731204	298	3' UTR	80730758	80744993	14236	2	Bcl3
Chr1	80773917	80775667	1751	3' UTR	80773819	80783898	10080	2	Ceacam16
Chr1	80820503	80823911	3409	3' UTR	80820306	80835712	15407	2	PVR
Chr1	80851031	80851378	348	3' UTR	80851216	80853236	2021	1	LOC108349553
Chr1	81035835	81037966	2132	3' UTR	81035686	81042628	6943	2	Zfp111
Chr1	81063727	81063924	198	Exon (XR_001835690.1/LOC108348999, exon 3 of 3)	81060665	81072420	11756	2	LOC108348999
Chr1	81122888	81126552	3665	Exon (NM_001017512.2/Zfp61, exon 4 of 6)	81122789	81130528	7740	2	Zfp61
Chr1	81137643	81138186	544	3' UTR	81137495	81152458	14964	2	Zfp94
Chr1	81138284	81139518	1235	3' UTR	81137495	81152458	14964	2	Zfp94
Chr1	81143911	81144059	149	5' UTR	81137495	81152458	14964	2	Zfp94
Chr1	81158891	81163502	4612	3' UTR	81158743	81173245	14503	2	LOC102548695
Chr1	81885566	81886113	548	3' UTR	81885516	81946714	61199	2	Grik5
Chr1	82073073	82086664	13592	3' UTR	82073024	82089028	16005	2	Dedd2
Chr1	82097293	82097489	197	3' UTR	82097244	82108203	10960	2	Gsk3a
Chr1	82113488	82114032	545	3' UTR	82112449	82119480	7032	2	Erf
Chr1	82114280	82114824	545	3' UTR	82112449	82119480	7032	2	Erf
Chr1	82114972	82116221	1250	Exon (XM_008758917.2/Erf, exon 2 of 4)	82112449	82119480	7032	2	Erf
Chr1	82163782	82164674	893	Exon (XM_017588652.1/Pafah1b3, exon 4 of 5)	82163733	82165946	2214	2	Pafah1b3
Chr1	82248130	82248527	398	3' UTR	82244899	82405267	160369	1	LOC102549342
Chr1	82248967	82251340	2374	Exon (XM_006228393.2/Lipe, exon 8 of 10)	82244899	82405267	160369	1	LOC102549342
Chr1	82256898	82257395	498	5' UTR	82244899	82405267	160369	1	LOC102549342
Chr1	82328501	82329195	695	3' UTR	82327955	82344345	16391	2	Ceacam1
Chr1	82329294	82329443	150	3' UTR	82327955	82344345	16391	2	Ceacam1
Chr1	82463874	82465234	1361	3' UTR	82463824	82469393	5570	2	Tmem91
Chr1	82504821	82508031	3211	3' UTR	82503571	82511327	7757	2	Ccdc97
Chr1	82595261	82596204	944	3' UTR	82595211	82610350	15140	2	Cyp2s1
Chr1	83975606	83977228	1623	5' UTR	83969456	83976452	6997	2	Egln2
Chr1	83979347	83979544	198	3' UTR	83979298	83990588	11291	2	Rab4b
Chr1	84019057	84019954	898	3' UTR	84018857	84040433	21577	2	Itpkc
Chr1	84118096	84118246	151	3' UTR	84118046	84150084	32039	2	Ltbp4
Chr1	84154753	84155003	251	3' UTR	84154703	84168074	13372	2	Shkbp1
Chr1	84168994	84178653	9660	3' UTR	84168494	84207151	38658	2	Sptbn4
Chr1	84181290	84183653	2364	Exon (XM_017589123.1/Sptbn4, exon 7 of 19)	84168494	84207151	38658	2	Sptbn4
Chr1	84183844	84183994	151	Exon (XM_017589123.1/Sptbn4, exon 6 of 19)	84168494	84207151	38658	2	Sptbn4
Chr1	84202596	84207054	4459	5' UTR	84168494	84207151	38658	2	Sptbn4
Chr1	84339467	84339715	249	3' UTR	84339269	84354983	15715	2	Pld3
Chr1	84473227	84481381	8155	3' UTR	84473178	84491479	18302	2	Map3k10
Chr1	84485942	84491442	5501	5' UTR	84473178	84491479	18302	2	Map3k10
Chr1	84720190	84720389	200	3' UTR	84719744	84739532	19789	2	LOC102553760
Chr1	84720587	84720885	299	3' UTR	84719744	84739532	19789	2	LOC102553760
Chr1	84722472	84723067	596	Exon (XM_008759210.2/LOC102553760, exon 5 of 5)	84719744	84739532	19789	2	LOC102553760
Chr1	84723166	84731872	8707	Exon (XM_008759210.2/LOC102553760, exon 4 of 5)	84719744	84739532	19789	2	LOC102553760
Chr1	84792853	84793199	347	Exon (XM_017590438.1/LOC102550530, exon 2 of 2)	84792063	84797519	5457	2	LOC102550530
Chr1	84811822	84811971	150	3' UTR	84811226	84812717	1492	2	LOC103689966
Chr1	84879156	84879855	700	3' UTR	84878906	84896554	17649	2	Zfp780b-ps1
Chr1	84879955	84881205	1251	Exon (XM_017590024.1/Zfp780b-ps1, exon 5 of 6)	84878906	84896554	17649	2	Zfp780b-ps1
Chr1	84893852	84894813	962	5' UTR	84878906	84896554	17649	2	Zfp780b-ps1
Chr1	84940204	84947523	7320	5' UTR	84937006	84948304	11299	2	Zfp59
Chr1	84952402	84958595	6194	5' UTR	84937006	84960093	23088	2	Zfp59
Chr1	85290986	85292473	1488	3' UTR	85290887	85306746	15860	2	Lrfn1
Chr1	85297235	85300543	3309	3' UTR	85290887	85306746	15860	2	Lrfn1
Chr1	85300642	85301862	1221	5' UTR	85291462	85300825	9364	2	Lrfn1
Chr1	85312570	85317900	5331	5' UTR	85312479	85317885	5407	2	Gmfg
Chr1	85362521	85365217	2697	3' UTR	85362421	85367999	5579	2	Paf1
Chr1	85508546	85509834	1289	3' UTR	85508397	85510131	1735	2	Eid2b
Chr1	85509933	85510131	199	5' UTR	85508397	85510131	1735	2	Eid2b
Chr1	85516050	85517125	1076	3' UTR	85515610	85517516	1907	2	Eid2
Chr1	86920728	86923424	2697	5' UTR	86920679	86923531	2853	2	Mrps12
Chr1	86941123	86941833	711	3' UTR	86941073	86948845	7773	2	Nfkbib
Chr1	87078111	87078952	842	3' UTR	87078012	87147308	69297	2	Actn4
Chr1	87261981	87262130	150	3' UTR	87260832	87298603	37772	2	Sipa1l3
Chr1	87314545	87320537	5993	Exon (XM_017588911.1/Sipa1l3, exon 9 of 22)	87260832	87459594	198763	2	Sipa1l3
Chr1	87320636	87327530	6895	Exon (XM_017588911.1/Sipa1l3, exon 8 of 22)	87260832	87459594	198763	2	Sipa1l3
Chr1	87343955	87344554	600	Exon (XM_017588911.1/Sipa1l3, exon 3 of 22)	87260832	87459594	198763	2	Sipa1l3
Chr1	87345004	87345453	450	5' UTR	87260832	87459594	198763	2	Sipa1l3
Chr1	88095337	88095965	629	3' UTR	88095240	88098785	3546	2	Fam98c
Chr1	88109253	88110584	1332	Exon (XM_008759146.2/Spred3, exon 2 of 6)	88101213	88110875	9663	2	Spred3
Chr1	88131382	88131682	301	3' UTR	88131282	88162608	31327	2	Catsperg1
Chr1	88408394	88408639	246	Exon (NM_001134726.1/Zfp566, exon 2 of 2)	88407903	88413209	5307	2	Zfp566
Chr1	88408737	88408933	197	Exon (NM_001134726.1/Zfp566, exon 2 of 2)	88407903	88413209	5307	2	Zfp566
Chr1	88623222	88623366	145	3' UTR	88619619	88623394	3776	1	Cox7a1
Chr1	88652493	88656620	4128	Exon (XM_017590031.1/LOC100912380, exon 3 of 10)	88623125	88658931	35807	2	LOC100912380
Chr1	88819587	88819785	199	3' UTR	88819439	88824917	5479	2	Lrfn3
Chr1	88819982	88824105	4124	Exon (NM_001107502.1/Lrfn3, exon 1 of 2)	88819439	88824917	5479	2	Lrfn3
Chr1	88824203	88824747	545	Exon (NM_001107502.1/Lrfn3, exon 1 of 2)	88819439	88824917	5479	2	Lrfn3
Chr1	88824845	88826212	1368	5' UTR	88819439	88824917	5479	2	Lrfn3
Chr1	88826311	88826706	396	5' UTR	88819443	88827002	7560	2	Lrfn3
Chr1	88910574	88910822	249	3' UTR	88909829	88921154	11326	2	Kirrel2
Chr1	88977560	88977810	251	3' UTR	88977460	88990780	13321	2	Arhgap33
Chr1	88995197	88995395	199	3' UTR	88994552	89007041	12490	2	Proser3
Chr1	89016188	89017276	1089	5' UTR	89016093	89017290	1198	2	Psenen
Chr1	89028069	89030638	2570	Exon (XM_008759254.2/Kmt2b, exon 25 of 38)	89022889	89042176	19288	2	Kmt2b
Chr1	89038745	89039595	851	Exon (XM_008759254.2/Kmt2b, exon 4 of 38)	89022889	89042176	19288	2	Kmt2b
Chr1	89039695	89040145	451	Exon (XM_008759254.2/Kmt2b, exon 4 of 38)	89022889	89042176	19288	2	Kmt2b
Chr1	89314923	89315173	251	3' UTR	89313475	89329487	16013	2	Cd22
Chr1	89324743	89324943	201	Exon (XM_008759152.2/Cd22, exon 6 of 16)	89313475	89329487	16013	2	Cd22
Chr1	89371897	89372193	297	3' UTR	89371798	89383005	11208	2	Usf2
Chr1	89383565	89383950	386	3' UTR	89383515	89399041	15527	2	Lsr
Chr1	89470055	89473575	3521	5' UTR	89464853	89474192	9340	2	Fxyd5
Chr1	89474651	89479530	4880	3' UTR	89474601	89483988	9388	2	Fxyd7
Chr1	89486881	89488180	1300	5' UTR	89484197	89487361	3165	2	Fxyd1
Chr1	89564081	89564279	199	3' UTR	89563982	89585680	21699	2	Gramd1a
Chr1	89966645	89974587	7943	3' UTR	89966496	89999799	33304	2	Wtip
Chr1	90011123	90017801	6679	3' UTR	90010681	90035522	24842	2	Uba2
Chr1	90063509	90063937	429	3' UTR	90063411	90091287	27877	2	Gpi
Chr1	90104821	90105620	800	Exon (NM_001271233.1/RGD1308428, exon 9 of 13)	90097331	90150317	52987	2	RGD1308428
Chr1	90149406	90150055	650	5' UTR	90097331	90150317	52987	2	RGD1308428
Chr1	90506847	90506996	150	3' UTR	90506697	90520012	13316	2	Kctd15
Chr1	90507096	90512344	5249	3' UTR	90506697	90520012	13316	2	Kctd15
Chr1	90542244	90543038	795	3' UTR	90542095	90622047	79953	2	Chst8
Chr1	90543138	90543991	854	Exon (XM_006228854.3/Chst8, exon 3 of 4)	90542095	90622047	79953	2	Chst8
Chr1	90963021	90963220	200	3' UTR	90962921	90978945	16025	2	LOC108348122
Chr1	91072313	91073871	1559	5' UTR	91070593	91073905	3313	2	LOC687508
Chr1	91290392	91296561	6170	5' UTR	91286956	91297459	10504	2	Cebpg
Chr1	91448461	91448710	250	3' UTR	91447308	91461843	14536	2	Lrp3
Chr1	91449159	91451860	2702	3' UTR	91447308	91461843	14536	2	Lrp3
Chr1	91537540	91540529	2990	Exon (NM_001106246.1/Gpatch1, exon 17 of 20)	91529096	91578022	48927	2	Gpatch1
Chr1	91657511	91658008	498	3' UTR	91657263	91663467	6205	2	Faap24
Chr1	91820417	91827156	6740	3' UTR	91820317	91831913	11597	2	Nudt19
Chr1	92003126	92003375	250	3' UTR	92002927	92069160	66234	2	Dpy19l3
Chr1	92007860	92008309	450	3' UTR	92002927	92069160	66234	2	Dpy19l3
Chr1	92090723	92110493	19771	3' UTR	92089674	92119951	30278	2	Zfp507
Chr1	92704517	92705655	1139	3' UTR	92703180	92775020	71841	2	Tshz3
Chr1	92705755	92706646	892	Exon (XM_006228893.2/Tshz3, exon 2 of 2)	92703180	92775020	71841	2	Tshz3
Chr1	92706794	92707141	348	Exon (XM_006228893.2/Tshz3, exon 2 of 2)	92703180	92775020	71841	2	Tshz3
Chr1	93692105	93948113	256009	Exon (XR_001835729.1/LOC108349103, exon 1 of 3)	93831932	93837657	5726	2	LOC103691087
Chr1	93948212	93948412	201	Exon (XM_008759274.2/Zfp536, exon 4 of 7)	93689114	94094518	405405	2	Zfp536
Chr1	94347858	94353977	6120	3' UTR	94346513	94404362	57850	2	Uri1
Chr1	94367503	94404013	36511	5' UTR	94346513	94404362	57850	2	Uri1
Chr1	94485979	94486884	906	3' UTR	94485830	94495067	9238	2	Ccne1
Chr1	94609433	94610804	1372	3' UTR	94609041	94616565	7525	2	Plekhf1
Chr1	94661225	94661569	345	3' UTR	94661127	94669461	8335	2	Pop4
Chr1	94780695	94780845	151	Exon (XM_017589477.1/LOC365238, exon 2 of 2)	94779496	94788362	8867	2	LOC365238
Chr1	98458740	98461786	3047	3' UTR	98458691	98467444	8754	2	Vsig10l
Chr1	98472875	98486891	14017	Exon (NM_001004220.1/Etfb, exon 1 of 6)	98472776	98486940	14165	2	Etfb
Chr1	98513258	98513407	150	3' UTR	98512663	98521736	9074	2	Siglec10
Chr1	98562451	98562750	300	3' UTR	98562351	98570726	8376	2	Siglec5
Chr1	99053833	99054080	248	Exon (XM_017590445.1/LOC108349760, exon 5 of 5)	99053289	99074315	21027	2	LOC108349760
Chr1	99054722	99054969	248	Exon (XM_017590445.1/LOC108349760, exon 5 of 5)	99053289	99074315	21027	2	LOC108349760
Chr1	100226361	100226610	250	3' UTR	100226311	100234509	8199	2	Acpt
Chr1	100346146	100346295	150	3' UTR	100346096	100359511	13416	2	RGD1309036
Chr1	100350457	100352694	2238	3' UTR	100346096	100359511	13416	2	RGD1309036
Chr1	100360129	100360675	547	5' UTR	100346282	100360182	13901	2	RGD1309036
Chr1	100428164	100433234	5071	Exon (XR_001835753.1/LOC108349570, exon 1 of 3)	100427869	100433982	6114	2	LOC108349570
Chr1	100433480	100434257	778	Exon (XR_001835753.1/LOC108349570, exon 1 of 3)	100427869	100433982	6114	2	LOC108349570
Chr1	100611659	100632245	20587	Exon (NM_001100690.1/Myh14, exon 21 of 42)	100608975	100671074	62100	2	Myh14
Chr1	100807870	100808216	347	3' UTR	100807821	100810918	3098	2	Atf5
Chr1	100810603	100811916	1314	5' UTR	100807821	100810918	3098	2	Atf5
Chr1	100872487	100873624	1138	3' UTR	100872240	100887683	15444	2	Med25
Chr1	100875018	100875628	611	Exon (XM_006229013.2/Med25, exon 16 of 17)	100872240	100887683	15444	2	Med25
Chr1	100955144	100955393	250	3' UTR	100955094	100968685	13592	2	Cpt1c
Chr1	100997824	100999890	2067	3' UTR	100997724	101010752	13029	2	Scaf1
Chr1	100999989	101001523	1535	Exon (XM_008759410.2/Scaf1, exon 7 of 11)	100997724	101010752	13029	2	Scaf1
Chr1	101001623	101001872	250	Exon (XM_008759410.2/Scaf1, exon 7 of 11)	100997724	101010752	13029	2	Scaf1
Chr1	101001971	101003117	1147	Exon (XM_008759410.2/Scaf1, exon 7 of 11)	100997724	101010752	13029	2	Scaf1
Chr1	101003267	101006986	3720	Exon (XM_008759410.2/Scaf1, exon 5 of 11)	100997724	101010752	13029	2	Scaf1
Chr1	101022423	101029169	6747	3' UTR	101022373	101046228	23856	2	Prr12
Chr1	101038961	101039261	301	Exon (XM_008759481.2/Prr12, exon 6 of 15)	101022373	101046228	23856	2	Prr12
Chr1	101040061	101040911	851	Exon (XM_008759481.2/Prr12, exon 5 of 15)	101022373	101046228	23856	2	Prr12
Chr1	101041061	101041810	750	Exon (XM_008759481.2/Prr12, exon 5 of 15)	101022373	101046228	23856	2	Prr12
Chr1	101077069	101077718	650	3' UTR	101076971	101086198	9228	2	Rcn3
Chr1	101120469	101120938	470	3' UTR	101120325	101123399	3075	2	Rpl13a
Chr1	101138287	101138487	201	3' UTR	101138237	101151034	12798	2	Aldh16a1
Chr1	101230569	101230815	247	3' UTR	101230470	101235778	5309	2	Cd37
Chr1	101328944	101330551	1608	3' UTR	101328547	101357223	28677	2	Ppfia3
Chr1	101345575	101346873	1299	Exon (NM_001270985.2/Ppfia3, exon 8 of 30)	101328547	101357223	28677	2	Ppfia3
Chr1	101348161	101349519	1359	Exon (NM_001270985.2/Ppfia3, exon 5 of 30)	101328547	101357223	28677	2	Ppfia3
Chr1	101358747	101359639	893	Exon (XR_350320.3/Lin7b, exon 4 of 6)	101358313	101361439	3127	2	Lin7b
Chr1	101367570	101373621	6052	3' UTR	101367470	101387658	20189	2	Snrnp70
Chr1	101466087	101467035	949	3' UTR	101465937	101476864	10928	2	Dhdh
Chr1	101486996	101500667	13672	5' UTR	101480161	101500284	20124	2	Nucb1
Chr1	101511999	101514943	2945	5' UTR	101511899	101514974	3076	2	Ppp1r15a
Chr1	101633517	101633666	150	Exon (XM_006229135.3/Fut2, exon 3 of 3)	101631633	101642700	11068	2	Fut2
Chr1	101664091	101664239	149	Exon (NM_001135584.1/Sec1, exon 1 of 1)	101663205	101664436	1232	2	Sec1
Chr1	101693268	101693466	199	3' UTR	101692972	101697277	4306	2	Sphk2
Chr1	101693565	101695015	1451	Exon (NM_001012066.1/Sphk2, exon 4 of 6)	101692972	101697277	4306	2	Sphk2
Chr1	101712304	101712453	150	Exon (XM_008759338.2/Sult2b1, exon 7 of 7)	101712254	101725203	12950	2	Sult2b1
Chr1	101796448	101796596	149	3' UTR	101796349	101803186	6838	2	Cyth2
Chr1	101805630	101809147	3518	5' UTR	101805531	101809544	4014	2	Kcnj14
Chr1	101813454	101815628	2175	3' UTR	101813356	101819058	5703	2	Grwd1
Chr1	101820157	101820906	750	3' UTR	101819068	101859146	40079	2	Grin2d
Chr1	101821355	101821605	251	Exon (XM_008759316.2/Grin2d, exon 13 of 14)	101819068	101859146	40079	2	Grin2d
Chr1	101822204	101822657	454	Exon (XM_008759316.2/Grin2d, exon 12 of 14)	101819068	101859146	40079	2	Grin2d
Chr1	101853605	101853904	300	5' UTR	101819068	101859146	40079	2	Grin2d
Chr1	101856650	101856800	151	5' UTR	101819068	101859146	40079	2	Grin2d
Chr1	101959651	101959950	300	3' UTR	101954786	102013252	58467	2	Abcc6
Chr1	101960100	101960249	150	3' UTR	101954786	102013252	58467	2	Abcc6
Chr1	101960398	101961153	756	3' UTR	101954786	102013252	58467	2	Abcc6
Chr1	102103242	102106638	3397	5' UTR	102103093	102106539	3447	2	Kcnj11
Chr1	102461376	102461667	292	3' UTR	102461327	102664977	203651	2	Sergef
Chr1	102823637	102823987	351	Exon (NM_001135612.1/Hps5, exon 16 of 23)	102810114	102849430	39317	2	Hps5
Chr1	103118268	103118417	150	Exon (XM_006229261.3/LOC100365259, exon 3 of 4)	103115280	103129438	14159	2	LOC100365259
Chr1	103118516	103128495	9980	Exon (XM_006229261.3/LOC100365259, exon 1 of 4)	103115280	103129438	14159	2	LOC100365259
Chr1	103197968	103198267	300	3' UTR	103197918	103254071	56154	2	Ptpn5
Chr1	107230697	107230845	149	3' UTR	107229516	107232321	2806	2	Fancf
Chr1	107231140	107231878	739	3' UTR	107229516	107232321	2806	2	Fancf
Chr1	107368952	107373660	4709	Exon (NM_001271084.1/Svip, exon 1 of 4)	107368117	107373807	5691	2	Svip
Chr1	112158672	112165111	6440	Exon (XM_017589765.1/Gabrg3, exon 7 of 9)	112158525	112812267	653743	2	Gabrg3
Chr1	112834733	112846162	11430	3' UTR	112833941	112947385	113445	2	Gabra5
Chr1	114387533	114387932	400	3' UTR	114372062	114395837	23776	1	LOC108348727
Chr1	116566209	116567187	979	5' UTR	116565779	116567283	1505	2	LOC100912195
Chr1	117146495	117146692	198	Exon (XR_350364.2/LOC102552061, exon 1 of 5)	117130767	117147185	16419	2	LOC102552061
Chr1	117146939	117147086	148	Exon (XR_350364.2/LOC102552061, exon 1 of 5)	117130767	117147185	16419	2	LOC102552061
Chr1	121010101	121010446	346	Exon (XR_590257.2/LOC102555617, exon 4 of 4)	121010052	121018201	8150	2	LOC102555617
Chr1	121010693	121010939	247	Exon (XR_590257.2/LOC102555617, exon 4 of 4)	121010052	121018201	8150	2	LOC102555617
Chr1	121257080	121257230	151	Exon (XR_001835792.1/LOC102555866, exon 7 of 7)	121256980	121294676	37697	2	LOC102555866
Chr1	121257330	121281925	24596	Exon (XR_001835792.1/LOC102555866, exon 6 of 7)	121256980	121294676	37697	2	LOC102555866
Chr1	123063385	123063534	150	Exon (XM_218735.10/Mkrn3, exon 2 of 2)	123062049	123064763	2715	2	Mkrn3
Chr1	123900534	123900833	300	3' UTR	123897341	124039263	141923	2	Chrna7
Chr1	123900933	123901182	250	3' UTR	123897341	124039263	141923	2	Chrna7
Chr1	124772642	124803178	30537	3' UTR	124772596	124803363	30768	2	Klf13
Chr1	125182217	125182716	500	3' UTR	125182117	125209772	27656	2	Fan1
Chr1	125183165	125186065	2901	3' UTR	125182117	125209772	27656	2	Fan1
Chr1	125208075	125208425	351	Exon (XM_006229339.3/Fan1, exon 2 of 14)	125182117	125209772	27656	2	Fan1
Chr1	125208524	125208674	151	Exon (XM_006229339.3/Fan1, exon 2 of 14)	125182117	125209772	27656	2	Fan1
Chr1	125208874	125209073	200	Exon (XM_006229339.3/Fan1, exon 2 of 14)	125182117	125209772	27656	2	Fan1
Chr1	125219760	125228960	9201	Exon (NM_001106340.1/Mphosph10, exon 1 of 11)	125212869	125229060	16192	2	Mphosph10
Chr1	125553039	125556155	3117	3' UTR	125552990	125967984	414995	2	Fam189a1
Chr1	125664134	125664970	837	3' UTR	125552990	125967984	414995	2	Fam189a1
Chr1	126147286	126147585	300	3' UTR	126146489	126211439	64951	2	Tjp1
Chr1	126151521	126162472	10952	Exon (NM_001106266.1/Tjp1, exon 22 of 27)	126146489	126211439	64951	2	Tjp1
Chr1	126164538	126165722	1185	Exon (NM_001106266.1/Tjp1, exon 19 of 27)	126146489	126211439	64951	2	Tjp1
Chr1	126166247	126169467	3221	Exon (NM_001106266.1/Tjp1, exon 17 of 27)	126146489	126211439	64951	2	Tjp1
Chr1	127167764	127167913	150	3' UTR	127166866	127264631	97766	2	Lrrk1
Chr1	127171137	127171336	200	Exon (XR_001835843.1/LOC108349000, exon 1 of 2)	127171304	127174386	3083	1	LOC108349000
Chr1	127569621	127570071	451	Exon (XR_590276.2/Asb7, exon 5 of 7)	127545671	127599257	53587	2	Asb7
Chr1	128207965	128208114	150	3' UTR	128207715	128341678	133964	2	Mef2a
Chr1	128211460	128211610	151	Exon (XM_008759542.2/Mef2a, exon 12 of 12)	128207715	128341678	133964	2	Mef2a
Chr1	128487713	128487862	150	3' UTR	128486164	128604041	117878	2	Lrrc28
Chr1	128692162	128692461	300	3' UTR	128692112	128722043	29932	2	Synm
Chr1	128693060	128693409	350	3' UTR	128692112	128722043	29932	2	Synm
Chr1	128693858	128694107	250	3' UTR	128692112	128722043	29932	2	Synm
Chr1	128695903	128714229	18327	Exon (XM_006229337.2/Synm, exon 2 of 5)	128692112	128722043	29932	2	Synm
Chr1	129767136	129767483	348	3' UTR	129766097	129780075	13979	2	Arrdc4
Chr1	129767582	129769127	1546	3' UTR	129766097	129780075	13979	2	Arrdc4
Chr1	131447970	131448120	151	3' UTR	131447671	131454067	6397	2	Nr2f2
Chr1	131448219	131451996	3778	3' UTR	131447671	131454067	6397	2	Nr2f2
Chr1	131452095	131454273	2179	5' UTR	131447671	131454067	6397	2	Nr2f2
Chr1	131454572	131460314	5743	5' UTR	131459443	131625450	166008	1	LOC102553329
Chr1	134759878	134786644	26767	3' UTR	134757934	134870382	112449	2	Chd2
Chr1	134803849	134806856	3008	Exon (XM_006229369.3/Chd2, exon 21 of 38)	134757934	134870382	112449	2	Chd2
Chr1	134832372	134848723	16352	Exon (XM_006229369.3/Chd2, exon 2 of 38)	134757934	134870382	112449	2	Chd2
Chr1	134870013	134870162	150	5' UTR	134757934	134870382	112449	2	Chd2
Chr1	134873448	134887418	13971	Exon (XR_001835870.1/LOC108349594, exon 1 of 5)	134873399	134887628	14230	2	LOC108349594
Chr1	136017130	136017425	296	Exon (XM_006229378.3/Slco3a1, exon 2 of 11)	135790854	136073640	282787	2	Slco3a1
Chr1	136073345	136073591	247	5' UTR	135799801	136073483	273683	2	Slco3a1
Chr1	136666289	136668879	2591	3' UTR	136664199	136785616	121418	2	Sv2b
Chr1	136739125	136785611	46487	5' UTR	136664199	136785616	121418	2	Sv2b
Chr1	137334379	137334529	151	3' UTR	137333880	137352882	19003	2	Klhl25
Chr1	137334678	137340440	5763	3' UTR	137333880	137352882	19003	2	Klhl25
Chr1	137340689	137340839	151	Exon (XM_006229380.2/Klhl25, exon 2 of 3)	137333880	137352882	19003	2	Klhl25
Chr1	139991108	139991605	498	3' UTR	139890537	140262503	371967	2	Ntrk3
Chr1	139991705	139993894	2190	3' UTR	139890537	140262503	371967	2	Ntrk3
Chr1	140469607	140477386	7780	3' UTR	140469557	140477634	8078	2	Mrpl46
Chr1	140520004	140522990	2987	3' UTR	140519755	140535968	16214	2	Det1
Chr1	140532208	140532407	200	Exon (XM_006229398.3/Det1, exon 2 of 5)	140519755	140535968	16214	2	Det1
Chr1	140996808	140997308	501	Exon (XR_001835879.1/LOC108348916, exon 2 of 2)	140994359	140998221	3863	2	LOC108348916
Chr1	141172266	141173205	940	3' UTR	141116565	141172997	56433	1	Fanci
Chr1	141434283	141435151	869	3' UTR	141434183	141452589	18407	2	Kif7
Chr1	141437099	141438502	1404	Exon (XM_006229414.3/Kif7, exon 13 of 19)	141434183	141452589	18407	2	Kif7
Chr1	141438812	141438961	150	Exon (XM_006229414.3/Kif7, exon 12 of 19)	141434183	141452589	18407	2	Kif7
Chr1	141474336	141476359	2024	5' UTR	141474189	141481122	6934	2	Pex11a
Chr1	141579469	141579716	248	Exon (NM_031012.1/Anpep, exon 1 of 20)	141561364	141579820	18457	2	Anpep
Chr1	141613446	141613688	243	3' UTR	141612961	141655417	42457	2	Ap3s2
Chr1	142029238	142042094	12857	5' UTR	142034423	142050071	15649	1	Ttll13
Chr1	142109116	142110531	1416	3' UTR	142109066	142117851	8786	2	Rccd1
Chr1	142110830	142111224	395	Exon (XM_006229456.3/Rccd1, exon 5 of 8)	142109066	142117851	8786	2	Rccd1
Chr1	142118960	142119971	1012	3' UTR	142118910	142133627	14718	2	Unc45a
Chr1	142141894	142142740	847	3' UTR	142141695	142163518	21824	2	Man2a2
Chr1	142143635	142145818	2184	3' UTR	142141695	142163518	21824	2	Man2a2
Chr1	142186328	142187632	1305	3' UTR	142185092	142197296	12205	2	Furin
Chr1	142309580	142309927	348	Exon (XM_003748888.4/Blm, exon 4 of 23)	142246773	142332616	85844	2	Blm
Chr1	142712004	142712399	396	3' UTR	142711955	142720292	8338	2	Wdr73
Chr1	143284091	143284662	572	3' UTR	143284041	143311582	27542	2	Ap3b2
Chr1	143288251	143289799	1549	Exon (XM_006229468.3/Ap3b2, exon 16 of 26)	143284041	143311582	27542	2	Ap3b2
Chr1	143443894	143444092	199	3' UTR	143443300	143535579	92280	2	Homer2
Chr1	143601406	143601850	445	3' UTR	143601011	143607170	6160	2	RGD1305713
Chr1	143602196	143607042	4847	3' UTR	143601011	143607170	6160	2	RGD1305713
Chr1	143609828	143609975	148	3' UTR	143609729	143647124	37396	2	Btbd1
Chr1	143703407	143703753	347	3' UTR	143702864	143751789	48926	2	Hdgfrp3
Chr1	143718213	143718813	601	Exon (NM_145785.1/Hdgfrp3, exon 3 of 6)	143702864	143751789	48926	2	Hdgfrp3
Chr1	145781973	145784693	2721	3' UTR	145781923	145794754	12832	2	Il16
Chr1	145790375	145793458	3084	5' UTR	145781923	145794754	12832	2	Il16
Chr1	146028363	146029348	986	3' UTR	146027821	146029840	2020	2	Mesdc1
Chr1	146071965	146080230	8266	3' UTR	146069774	146226320	156547	2	Cemip
Chr1	146249493	146249790	298	3' UTR	146248505	146289465	40961	2	Abhd17c
Chr1	146713712	146718065	4354	3' UTR	146713663	146736339	22677	2	Fah
Chr1	148428399	148443356	14958	5' UTR	148425046	148443505	18460	2	Vbp1
Chr1	150324409	150324557	149	3' UTR	150323768	150395415	71648	2	Folh1
Chr1	152888780	152890663	1884	3' UTR	152886496	153096225	209730	2	Tmem135
Chr1	153732821	153734287	1467	3' UTR	153732528	153742111	9584	2	Prss23
Chr1	154064181	154066021	1841	3' UTR	154064132	154111999	47868	2	Ccdc81
Chr1	154212627	154216044	3418	5' UTR	154189252	154216119	26868	2	Eed
Chr1	154216143	154216291	149	5' UTR	154189259	154216340	27082	2	Eed
Chr1	154372037	154376911	4875	Exon (XR_350563.2/LOC102550036, exon 1 of 2)	154371888	154377110	5223	2	LOC102550036
Chr1	156291361	156291909	549	3' UTR	156290215	156296526	6312	2	Crebzf
Chr1	156294898	156296144	1247	5' UTR	156290215	156296526	6312	2	Crebzf
Chr1	156397564	156439928	42365	5' UTR	154916274	157274077	2357804	1	Dlg2
Chr1	157419466	157436781	17316	3' UTR	157419117	157461584	42468	2	Ankrd42
Chr1	157460641	157460990	350	5' UTR	157419117	157461584	42468	2	Ankrd42
Chr1	157461289	157461538	250	5' UTR	157419117	157461584	42468	2	Ankrd42
Chr1	157468662	157471130	2469	Exon (XM_008759657.2/Pcf11, exon 13 of 16)	157463014	157494134	31121	2	Pcf11
Chr1	157481599	157482198	600	Exon (XM_008759657.2/Pcf11, exon 8 of 16)	157463014	157494134	31121	2	Pcf11
Chr1	157482298	157483722	1425	Exon (XM_008759657.2/Pcf11, exon 7 of 16)	157463014	157494134	31121	2	Pcf11
Chr1	157483922	157484319	398	Exon (XM_008759657.2/Pcf11, exon 6 of 16)	157463014	157494134	31121	2	Pcf11
Chr1	157485400	157486149	750	Exon (XM_008759657.2/Pcf11, exon 5 of 16)	157463014	157494134	31121	2	Pcf11
Chr1	162283965	162284164	200	3' UTR	162283866	162307266	23401	2	Usp35
Chr1	162284659	162288661	4003	3' UTR	162283866	162307266	23401	2	Usp35
Chr1	162527363	162545278	17916	5' UTR	162519513	162549205	29693	2	Aamdc
Chr1	162703444	162712718	9275	3' UTR	162703394	162713560	10167	2	Aqp11
Chr1	162712817	162712966	150	Exon (NM_173105.1/Aqp11, exon 1 of 3)	162703394	162713560	10167	2	Aqp11
Chr1	162713065	162713312	248	Exon (NM_173105.1/Aqp11, exon 1 of 3)	162703394	162713560	10167	2	Aqp11
Chr1	163001462	163001612	151	3' UTR	163001313	163065331	64019	2	Myo7a
Chr1	163073184	163073680	497	3' UTR	163073134	163115221	42088	2	Capn5
Chr1	163073780	163074177	398	3' UTR	163073134	163115221	42088	2	Capn5
Chr1	163164132	163164282	151	3' UTR	163160987	163216342	55356	2	Acer3
Chr1	163317627	163319505	1879	3' UTR	163317281	163328352	11072	2	Tsku
Chr1	163543666	163547980	4315	3' UTR	163541071	163618575	77505	2	Emsy
Chr1	163549291	163554761	5471	Exon (XM_006229811.3/Emsy, exon 17 of 21)	163541071	163618575	77505	2	Emsy
Chr1	163613935	163614135	201	5' UTR	163541071	163618575	77505	2	Emsy
Chr1	163845598	163864062	18465	3' UTR	163844804	164101566	256763	2	Uvrag
Chr1	163866344	163939017	72674	Exon (XM_006229763.2/Uvrag, exon 12 of 15)	163844804	164101566	256763	2	Uvrag
Chr1	164589112	164589406	295	3' UTR	164588032	164591872	3841	2	Tpbgl
Chr1	164590044	164590240	197	Exon (XM_003748929.4/Tpbgl, exon 2 of 2)	164588032	164591872	3841	2	Tpbgl
Chr1	164624900	164626728	1829	3' UTR	164621611	164627602	5992	1	LOC108349134
Chr1	164804067	164805104	1038	3' UTR	164803574	164814651	11078	2	Neu3
Chr1	164922196	164922395	200	Exon (XM_006229823.3/Rnf169, exon 5 of 5)	164917069	164940842	23774	2	Rnf169
Chr1	164922494	164922793	300	Exon (XM_006229823.3/Rnf169, exon 5 of 5)	164917069	164940842	23774	2	Rnf169
Chr1	165085191	165097562	12372	3' UTR	165085142	165122385	37244	2	Pold3
Chr1	165182261	165182410	150	Exon (NR_131097.1/LOC100912071, exon 3 of 3)	165181861	165237452	55592	2	LOC100912071
Chr1	165183609	165183859	251	Exon (NR_131097.1/LOC100912071, exon 3 of 3)	165181861	165237452	55592	2	LOC100912071
Chr1	165183959	165184158	200	Exon (NR_131097.1/LOC100912071, exon 3 of 3)	165181861	165237452	55592	2	LOC100912071
Chr1	165590638	165593969	3332	Exon (XR_350590.1/LOC102548233, exon 1 of 2)	165590389	165594666	4278	2	LOC102548233
Chr1	165884857	165885107	251	3' UTR	165884407	165891627	7221	2	Relt
Chr1	165885207	165885456	250	3' UTR	165884407	165891627	7221	2	Relt
Chr1	165973288	165973837	550	3' UTR	165972439	165997751	25313	2	P2ry6
Chr1	165974237	165975405	1169	5' UTR	165972439	165997751	25313	2	P2ry6
Chr1	166031524	166037236	5713	5' UTR	166031228	166045423	14196	2	P2ry2
Chr1	166898327	166898526	200	3' UTR	166898177	166911694	13518	2	Inppl1
Chr1	166899184	166899882	699	Exon (NM_001270843.1/Inppl1, exon 27 of 28)	166898177	166911694	13518	2	Inppl1
Chr1	166899983	166901423	1441	Exon (NM_001270843.1/Inppl1, exon 24 of 28)	166898177	166911694	13518	2	Inppl1
Chr1	166915143	166915387	245	3' UTR	166915045	166933377	18333	2	Folr2
Chr1	167091670	167091916	247	3' UTR	167091521	167093560	2040	2	Il18bp
Chr1	167094981	167095180	200	5' UTR	167091521	167095727	4207	2	Il18bp
Chr1	167095965	167111126	15162	3' UTR	167095916	167165255	69340	2	Rnf121
Chr1	167214066	167214416	351	3' UTR	167213866	167308680	94815	2	Nup98
Chr1	167214516	167214666	151	3' UTR	167213866	167308680	94815	2	Nup98
Chr1	167214765	167218169	3405	3' UTR	167213866	167308680	94815	2	Nup98
Chr1	167246525	167248512	1988	Exon (XM_006229892.3/Nup98, exon 19 of 33)	167213866	167308680	94815	2	Nup98
Chr1	167336197	167337338	1142	5' UTR	167336147	167347603	11457	2	Rhog
Chr1	167835968	167843152	7185	Exon (XM_008759840.2/Trim68, exon 2 of 7)	167835773	167849880	14108	2	Trim68
Chr1	169446923	169447372	450	3' UTR	169446774	169463700	16927	2	Trim5
Chr1	170216555	170218982	2428	3' UTR	170216505	170238892	22388	2	Fam160a2
Chr1	170221761	170222307	547	Exon (NM_001005538.2/Fam160a2, exon 9 of 12)	170216505	170238892	22388	2	Fam160a2
Chr1	170397065	170398207	1143	5' UTR	170387625	170398220	10596	2	Apbb1
Chr1	170403399	170410765	7367	5' UTR	170387630	170404045	16416	2	Apbb1
Chr1	170441711	170442155	445	3' UTR	170441662	170464341	22680	2	Trim3
Chr1	170449056	170450105	1050	Exon (NM_031786.1/Trim3, exon 5 of 12)	170441662	170464341	22680	2	Trim3
Chr1	170466488	170466637	150	3' UTR	170464995	170469825	4831	2	Arfip2
Chr1	170466836	170467935	1100	3' UTR	170464995	170469825	4831	2	Arfip2
Chr1	170575311	170575844	534	Exon (NM_001008346.1/Rrp8, exon 5 of 7)	170574670	170578693	4024	2	Rrp8
Chr1	170576072	170576972	901	Exon (NM_001008346.1/Rrp8, exon 2 of 7)	170574670	170578693	4024	2	Rrp8
Chr1	170588429	170589517	1089	3' UTR	170588036	170594159	6124	2	Tpp1
Chr1	170595081	170598413	3333	3' UTR	170594981	170629062	34082	2	Dchs1
Chr1	170600744	170601192	449	Exon (XM_006229942.2/Dchs1, exon 14 of 21)	170594981	170629062	34082	2	Dchs1
Chr1	170652735	170653029	295	3' UTR	170652293	170653982	1690	2	Mrpl17
Chr1	173629368	173630467	1100	3' UTR	173629218	173661794	32577	2	Ric3
Chr1	173633415	173654415	21001	3' UTR	173648640	173649453	814	1	LOC108349532
Chr1	174165924	174173046	7123	Exon (NM_001107547.1/St5, exon 4 of 20)	174137120	174289647	152528	2	St5
Chr1	174173146	174174093	948	Exon (NM_001107547.1/St5, exon 4 of 20)	174137120	174289647	152528	2	St5
Chr1	174351512	174351661	150	3' UTR	174351413	174352058	646	2	Ascl3
Chr1	174360582	174360780	199	3' UTR	174360533	174380326	19794	2	Tmem9b
Chr1	174387452	174387699	248	3' UTR	174385424	174411141	25718	2	Nrip3
Chr1	174605932	174606080	149	3' UTR	174605833	174620064	14232	2	Tmem41b
Chr1	174948511	174948761	251	3' UTR	174948361	175364128	415768	2	Sbf2
Chr1	174948861	174949810	950	3' UTR	174948361	175364128	415768	2	Sbf2
Chr1	175664111	175665155	1045	3' UTR	175663266	175676699	13434	2	Lyve1
Chr1	175682010	175682908	899	3' UTR	175681960	175762294	80335	2	Mrvi1
Chr1	175684406	175684555	150	3' UTR	175681960	175762294	80335	2	Mrvi1
Chr1	175684655	175684905	251	3' UTR	175681960	175762294	80335	2	Mrvi1
Chr1	175685005	175689855	4851	3' UTR	175681960	175762294	80335	2	Mrvi1
Chr1	176982320	176982977	658	5' UTR	176940424	176983076	42653	2	Dkk3
Chr1	178139359	178148780	9422	Exon (NM_001014022.1/Btbd10, exon 7 of 9)	178138562	178196294	57733	2	Btbd10
Chr1	178941349	178941496	148	3' UTR	178940515	179010257	69743	2	Rras2
Chr1	185106872	185124774	17903	3' UTR	185106773	185143207	36435	2	Nucb2
Chr1	185558959	185569090	10132	5' UTR	185557633	185569186	11554	2	RGD1311703
Chr1	187784767	187787067	2301	3' UTR	187781577	187882833	101257	2	Smg1
Chr1	187796569	187796819	251	Exon (XM_008759828.2/Smg1, exon 54 of 63)	187781577	187882833	101257	2	Smg1
Chr1	188035310	188035757	448	3' UTR	188034614	188096837	62224	2	Syt17
Chr1	188088012	188088361	350	Exon (XM_008759675.1/Syt17, exon 3 of 6)	188034614	188096837	62224	2	Syt17
Chr1	188141003	188141402	400	3' UTR	188140853	188142748	1896	2	Itpripl2
Chr1	188395295	188395445	151	Exon (NM_032615.2/Gde1, exon 5 of 9)	188367550	188407125	39576	2	Gde1
Chr1	188568700	188568948	249	Exon (NM_001134611.2/Knop1, exon 2 of 3)	188566964	188571954	4991	2	Knop1
Chr1	188689387	188701369	11983	3' UTR	188695104	188706491	11388	1	LOC102550985
Chr1	188701468	188713219	11752	5' UTR	188688743	188713280	24538	2	Gprc5b
Chr1	188854519	188854667	149	Exon (NM_001024241.1/Gpr139, exon 2 of 2)	188854371	188895223	40853	2	Gpr139
Chr1	189458526	189460765	2240	3' UTR	189435823	189458799	22977	1	Acsm4
Chr1	189540983	189541131	149	3' UTR	189514504	189541233	26730	1	Acsm3
Chr1	189541328	189542560	1233	3' UTR	189540145	189549891	9747	2	Eri2
Chr1	189628188	189628387	200	3' UTR	189626442	189665847	39406	2	Dcun1d3
Chr1	189628487	189630476	1990	Exon (XM_008759750.2/Dcun1d3, exon 2 of 3)	189626442	189665847	39406	2	Dcun1d3
Chr1	189630576	189665755	35180	5' UTR	189665401	189685836	20436	1	Lyrm1
Chr1	189666290	189666440	151	5' UTR	189627972	189666440	38469	2	Dcun1d3
Chr1	190527989	190529290	1302	Exon (XR_590447.2/LOC102555352, exon 2 of 3)	190526109	190529914	3806	2	LOC102555352
Chr1	190586374	190591171	4798	Exon (XM_008759743.2/Pdzd9, exon 3 of 4)	190584878	190598144	13267	2	Pdzd9
Chr1	190779344	190779493	150	Exon (XR_350683.2/LOC102556194, exon 2 of 2)	190777902	190780095	2194	2	LOC102556194
Chr1	190889798	190893050	3253	3' UTR	190889698	190914606	24909	2	Cdr2
Chr1	190997921	190998070	150	3' UTR	190997029	191007503	10475	2	Igsf6
Chr1	191616785	191622219	5435	Exon (NM_001107548.1/Usp31, exon 13 of 15)	191615146	191651628	36483	2	Usp31
Chr1	191889382	191889778	397	3' UTR	191889332	191948977	59646	2	Cog7
Chr1	191948729	191948878	150	Exon (NM_001033889.1/Cog7, exon 1 of 17)	191889332	191948977	59646	2	Cog7
Chr1	191952219	191952416	198	3' UTR	191951578	191984858	33281	2	Gga2
Chr1	191997659	191997855	197	3' UTR	191997512	192025350	27839	2	Ears2
Chr1	192079350	192079499	150	Exon (XM_008759711.2/Palb2, exon 3 of 11)	192064586	192086940	22355	2	Palb2
Chr1	192079648	192079896	249	Exon (XM_008759711.2/Palb2, exon 3 of 11)	192064586	192086940	22355	2	Palb2
Chr1	192083052	192083300	249	Exon (XM_008759711.2/Palb2, exon 2 of 11)	192064586	192086940	22355	2	Palb2
Chr1	192083994	192084193	200	Exon (XM_008759711.2/Palb2, exon 2 of 11)	192064586	192086940	22355	2	Palb2
Chr1	193239186	193239834	649	3' UTR	193239036	193328371	89336	2	Arhgap17
Chr1	193246255	193246455	201	Exon (NM_001270692.1/Arhgap17, exon 19 of 20)	193239036	193328371	89336	2	Arhgap17
Chr1	193441344	193441492	149	Exon (XM_001079250.6/Zkscan2, exon 7 of 7)	193440749	193459755	19007	2	Zkscan2
Chr1	193441592	193441839	248	Exon (XM_001079250.6/Zkscan2, exon 7 of 7)	193440749	193459755	19007	2	Zkscan2
Chr1	193443926	193444074	149	Exon (XM_001079250.6/Zkscan2, exon 6 of 7)	193440749	193459755	19007	2	Zkscan2
Chr1	193835333	194240213	404881	5' UTR	194071952	194078064	6113	2	LOC103691223
Chr1	194924742	194929649	4908	Exon (XR_001835967.1/LOC103691231, exon 1 of 10)	194856479	194929649	73171	2	LOC103691231
Chr1	195061277	195062726	1450	Exon (XR_001835978.1/LOC102547183, exon 3 of 7)	195032373	195064930	32558	2	LOC102547183
Chr1	197032922	197033992	1071	3' UTR	197032473	197071806	39334	2	Gtf3c1
Chr1	197271753	197295658	23906	3' UTR	197271704	197482776	211073	2	Gsg1l
Chr1	197500658	197501104	447	3' UTR	197500509	197590277	89769	2	Xpo6
Chr1	197549711	197556279	6569	Exon (NM_001011935.2/Xpo6, exon 5 of 24)	197500509	197590277	89769	2	Xpo6
Chr1	197771245	197771442	198	3' UTR	197771196	197778475	7280	2	Spns1
Chr1	197815522	197815721	200	3' UTR	197815422	197821837	6416	2	Cd19
Chr1	197815870	197816020	151	3' UTR	197815422	197821837	6416	2	Cd19
Chr1	197884169	197884618	450	Exon (NM_001048180.1/Sh2b1, exon 1 of 9)	197878839	197884951	6113	2	Sh2b1
Chr1	197884918	197885067	150	5' UTR	197878839	197884951	6113	2	Sh2b1
Chr1	197886763	197886913	151	5' UTR	197878839	197887103	8265	2	Sh2b1
Chr1	197908236	197908484	249	3' UTR	197908087	197918384	10298	2	Atxn2l
Chr1	197908980	197909129	150	3' UTR	197908087	197918384	10298	2	Atxn2l
Chr1	197976018	197979537	3520	Exon (NM_001100662.1/Eif3c, exon 5 of 21)	197964406	197982601	18196	2	Eif3c
Chr1	197986434	197986583	150	3' UTR	197986384	197997664	11281	2	Cln3
Chr1	198100635	198100927	293	3' UTR	198100586	198104106	3521	2	Sult1a1
Chr1	198123932	198124739	808	3' UTR	198123883	198128857	4975	2	Coro1a
Chr1	198222291	198225444	3154	5' UTR	198219012	198225386	6375	2	Ppp4c
Chr1	198287588	198288035	448	3' UTR	198282828	198288611	5784	1	Doc2a
Chr1	198288283	198288532	250	3' UTR	198282828	198288611	5784	1	Doc2a
Chr1	198301939	198302288	350	3' UTR	198301789	198321710	19922	2	Taok2
Chr1	198306989	198311174	4186	Exon (XM_006230331.3/Taok2, exon 11 of 19)	198301789	198321710	19922	2	Taok2
Chr1	198320389	198320638	250	5' UTR	198301789	198321710	19922	2	Taok2
Chr1	198381990	198382635	646	5' UTR	198379060	198382800	3741	2	Asphd1
Chr1	198420912	198421060	149	3' UTR	198420813	198448612	27800	2	Mvp
Chr1	198421483	198422801	1319	Exon (XM_017589686.1/Mvp, exon 12 of 15)	198420813	198448612	27800	2	Mvp
Chr1	198430324	198431959	1636	Exon (XM_017589686.1/Mvp, exon 5 of 15)	198420813	198448612	27800	2	Mvp
Chr1	198448985	198450102	1118	3' UTR	198448790	198451078	2289	2	Pagr1
Chr1	198458587	198459505	919	Exon (NM_001110319.1/Maz, exon 10 of 13)	198456699	198460126	3428	2	Maz
Chr1	198461505	198461881	377	Exon (NM_001009645.1/Kif22, exon 12 of 14)	198461406	198476430	15025	2	Kif22
Chr1	198544847	198545429	583	Exon (XM_006230246.3/Qprt, exon 2 of 4)	198544262	198559392	15131	2	Qprt
Chr1	198573643	198573841	199	3' UTR	198572999	198577226	4228	2	Spn
Chr1	198635495	198635940	446	3' UTR	198635445	198639437	3993	2	Cd2bp2
Chr1	198637501	198638897	1397	Exon (NM_001106297.2/Cd2bp2, exon 2 of 7)	198635445	198639437	3993	2	Cd2bp2
Chr1	198642111	198642906	796	3' UTR	198641018	198652674	11657	2	Tbc1d10b
Chr1	198651978	198652525	548	Exon (NM_001108921.1/Tbc1d10b, exon 1 of 9)	198641018	198652674	11657	2	Tbc1d10b
Chr1	198658841	198659035	195	3' UTR	198658744	198662571	3828	2	2022-09-01
Chr1	198659236	198659624	389	Exon (XM_017588994.1/Sept1, exon 9 of 11)	198658744	198662571	3828	2	2022-09-01
Chr1	198719207	198720884	1678	3' UTR	198719158	198721476	2319	2	Sephs2
Chr1	198792378	198792973	596	3' UTR	198792328	198796621	4294	2	Znf768
Chr1	198793271	198794835	1565	5' UTR	198792328	198796621	4294	2	Znf768
Chr1	198794934	198795083	150	5' UTR	198794840	198802215	7376	1	LOC102547029
Chr1	198829309	198830355	1047	3' UTR	198828861	198831878	3018	2	LOC102553962
Chr1	198830455	198830654	200	3' UTR	198828861	198831878	3018	2	LOC102553962
Chr1	198830754	198831529	776	Exon (XM_006230370.3/LOC102553962, exon 1 of 3)	198828861	198831878	3018	2	LOC102553962
Chr1	198836644	198836843	200	3' UTR	198834995	198839251	4257	2	LOC102553866
Chr1	198836943	198837893	951	Exon (XM_006230369.3/LOC102553866, exon 3 of 3)	198834995	198839251	4257	2	LOC102553866
Chr1	198865999	198868930	2932	3' UTR	198865950	198869078	3129	2	LOC102554302
Chr1	198894393	198895818	1426	3' UTR	198894000	198900364	6365	2	Zfp689
Chr1	199032204	199033463	1260	Exon (NM_001134694.2/Ccdc189, exon 8 of 9)	199032105	199037267	5163	2	Ccdc189
Chr1	199036721	199036870	150	5' UTR	199032105	199037267	5163	2	Ccdc189
Chr1	199052480	199052729	250	3' UTR	199037472	199052823	15352	1	Rnf40
Chr1	199053327	199053477	151	3' UTR	199052430	199065639	13210	2	Zfp629
Chr1	199056069	199056468	400	3' UTR	199052430	199065639	13210	2	Zfp629
Chr1	199056817	199059360	2544	3' UTR	199052430	199065639	13210	2	Zfp629
Chr1	199059609	199059858	250	Exon (XM_006230272.3/Zfp629, exon 3 of 3)	199052430	199065639	13210	2	Zfp629
Chr1	199059958	199060207	250	Exon (XM_006230272.3/Zfp629, exon 3 of 3)	199052430	199065639	13210	2	Zfp629
Chr1	199060307	199060706	400	Exon (XM_006230272.3/Zfp629, exon 3 of 3)	199052430	199065639	13210	2	Zfp629
Chr1	199061254	199061454	201	Exon (XM_006230272.3/Zfp629, exon 3 of 3)	199052430	199065639	13210	2	Zfp629
Chr1	199112291	199112440	150	3' UTR	199112192	199159097	46906	2	Bcl7c
Chr1	199112540	199113036	497	3' UTR	199112192	199159097	46906	2	Bcl7c
Chr1	199113483	199157512	44030	3' UTR	199112192	199159097	46906	2	Bcl7c
Chr1	199157661	199159026	1366	5' UTR	199158825	199158899	75	1	Mir762
Chr1	199312077	199313169	1093	Exon (NM_001107553.1/Zfp668, exon 3 of 3)	199310935	199320727	9793	2	Zfp668
Chr1	199313820	199315716	1897	5' UTR	199310935	199320727	9793	2	Zfp668
Chr1	199331306	199331504	199	3' UTR	199331108	199336227	5120	2	Prss53
Chr1	199652321	199652521	201	3' UTR	199645041	199655164	10124	2	LOC103691238
Chr1	199653568	199653768	201	3' UTR	199645041	199655164	10124	2	LOC103691238
Chr1	199654516	199654665	150	Exon (XM_017590235.1/LOC103691238, exon 1 of 3)	199645041	199655164	10124	2	LOC103691238
Chr1	199687824	199689815	1992	3' UTR	199687775	199716205	28431	2	RGD1310127
Chr1	199782174	199787164	4991	3' UTR	199782076	199823386	41311	2	Rgs10
Chr1	199794475	199808907	14433	Exon (NM_019337.1/Rgs10, exon 2 of 5)	199782076	199823386	41311	2	Rgs10
Chr1	199845104	199846636	1533	3' UTR	199844854	199865548	20695	2	Tial1
Chr1	200591001	200592001	1001	3' UTR	200590951	200677146	86196	2	Fgfr2
Chr1	200592101	200601420	9320	3' UTR	200590951	200677146	86196	2	Fgfr2
Chr1	201925475	201928805	3331	3' UTR	201924779	201943014	18236	2	RGD1305014
Chr1	201932590	201932739	150	Exon (XM_008759885.2/RGD1305014, exon 5 of 7)	201924779	201943014	18236	2	RGD1305014
Chr1	201964495	201979637	15143	5' UTR	201961524	201968815	7292	2	Ikzf5
Chr1	204048835	204049284	450	3' UTR	204048785	204161090	112306	2	Cpxm2
Chr1	204049484	204055074	5591	3' UTR	204048785	204161090	112306	2	Cpxm2
Chr1	204243546	204243796	251	3' UTR	204243396	204288432	45037	2	Chst15
Chr1	204244245	204254711	10467	3' UTR	204243396	204288432	45037	2	Chst15
Chr1	204274990	204275589	600	5' UTR	204245844	204275542	29699	2	Chst15
Chr1	204717910	204773798	55889	5' UTR	204714468	204778072	63605	2	Fam53b
Chr1	205001404	205004474	3071	3' UTR	205001354	205030565	29212	2	Ctbp2
Chr1	205755815	205756061	247	3' UTR	205755766	205771393	15628	2	Uros
Chr1	205756406	205761488	5083	3' UTR	205755766	205771393	15628	2	Uros
Chr1	205789842	205790042	201	3' UTR	205777474	205789887	12414	1	Bccip
Chr1	205810383	205816345	5963	Exon (NM_001130039.1/Dhx32, exon 3 of 12)	205789442	205842428	52987	2	Dhx32
Chr1	205824956	205825658	703	5' UTR	205789442	205842428	52987	2	Dhx32
Chr1	206324912	206325458	547	3' UTR	206324763	206417143	92381	2	LOC100302465
Chr1	206401017	206401215	199	Exon (NM_001163214.2/LOC100302465, exon 3 of 12)	206324763	206417143	92381	2	LOC100302465
Chr1	207116848	207117298	451	3' UTR	206900617	207414852	514236	1	Dock1
Chr1	207119098	207119248	151	3' UTR	206900617	207414852	514236	1	Dock1
Chr1	207152261	207152411	151	Exon (NM_001143803.1/Fam196a, exon 2 of 4)	206900617	207414852	514236	1	Dock1
Chr1	207152661	207152911	251	Exon (NM_001143803.1/Fam196a, exon 2 of 4)	206900617	207414852	514236	1	Dock1
Chr1	207993995	207998743	4749	3' UTR	207993895	208020454	26560	2	Mki67
Chr1	207999343	207999693	351	Exon (NM_001271366.1/Mki67, exon 13 of 15)	207993895	208020454	26560	2	Mki67
Chr1	209525338	209525891	554	3' UTR	209523153	209641139	117987	2	Ebf3
Chr1	209526951	209528641	1691	Exon (XM_006230465.3/Ebf3, exon 14 of 16)	209523153	209641139	117987	2	Ebf3
Chr1	209710896	209711043	148	3' UTR	209710798	209749973	39176	2	LOC100362342
Chr1	210550767	210554732	3966	3' UTR	210550668	210739600	188933	2	Tcerg1l
Chr1	211195490	211203301	7812	5' UTR	211195446	211196868	1423	2	Mapk1ip1
Chr1	211205522	211205672	151	5' UTR	211195440	211205766	10327	2	Mapk1ip1
Chr1	211440483	211440681	199	3' UTR	211440335	211520699	80365	2	Stk32c
Chr1	211440829	211449190	8362	3' UTR	211440335	211520699	80365	2	Stk32c
Chr1	211922438	211923166	729	3' UTR	211922389	211923929	1541	2	Nkx6-2
Chr1	211943784	211943934	151	3' UTR	211943436	212022287	78852	2	Cfap46
Chr1	212332746	212332895	150	5' UTR	212317510	212332895	15386	2	Adam8
Chr1	212622340	212622488	149	Exon (XM_006230573.3/Sprn, exon 2 of 2)	212619817	212623686	3870	2	Sprn
Chr1	213602934	213606409	3476	5' UTR	213602850	213605643	2794	2	Bet1l
Chr1	213727506	213727655	150	Exon (XM_008760021.2/LOC102555474, exon 4 of 4)	213723979	213730939	6961	2	LOC102555474
Chr1	213970406	213970942	537	3' UTR	213970163	213973224	3062	2	LOC100911402
Chr1	213971039	213971185	147	3' UTR	213970163	213973224	3062	2	LOC100911402
Chr1	214178649	214180704	2056	5' UTR	214178404	214181686	3283	2	Hras
Chr1	214283836	214300321	16486	3' UTR	214283787	214314859	31073	2	Deaf1
Chr1	214407320	214407469	150	3' UTR	214407072	214410069	2998	2	Cend1
Chr1	214407568	214407717	150	3' UTR	214407072	214410069	2998	2	Cend1
Chr1	214407817	214408462	646	3' UTR	214407072	214410069	2998	2	Cend1
Chr1	214612847	214612997	151	Exon (XM_008760036.2/Muc6, exon 33 of 35)	214608453	214630524	22072	2	Muc6
Chr1	214826666	214832371	5706	3' UTR	214823993	214841249	17257	2	Tollip
Chr1	214954138	214961690	7553	3' UTR	214953992	214962106	8115	2	Mob2
Chr1	214961960	214962106	147	Exon (NM_001109159.1/Mob2, exon 1 of 5)	214953992	214962106	8115	2	Mob2
Chr1	215031220	215033379	2160	Exon (NM_001108510.1/Dusp8, exon 5 of 8)	215030429	215043111	12683	2	Dusp8
Chr1	215521701	215536648	14948	3' UTR	215521604	215538283	16680	2	Ifitm10
Chr1	215745943	215747031	1089	Exon (NR_027324.1/H19, exon 1 of 5)	215745981	215746064	84	2	Mir675
Chr1	215829540	215830085	546	3' UTR	215828102	215834704	6603	2	Igf2
Chr1	215830581	215831225	645	3' UTR	215828102	215834704	6603	2	Igf2
Chr1	215831535	215834642	3108	5' UTR	215832088	215832160	73	2	Mir483
Chr1	216661898	216662852	955	Exon (NM_001033757.1/Cdkn1c, exon 1 of 3)	216661067	216663720	2654	2	Cdkn1c
Chr1	216737690	216742422	4733	Exon (XM_006230824.3/Nap1l4, exon 4 of 16)	216715352	216751710	36359	2	Nap1l4
Chr1	216759516	216772321	12806	3' UTR	216759367	216801652	42286	2	Cars
Chr1	216866412	216866960	549	3' UTR	216866263	216894551	28289	2	Osbpl5
Chr1	216867060	216867359	300	3' UTR	216866263	216894551	28289	2	Osbpl5
Chr1	216970303	216970547	245	Exon (XM_006230870.3/Mrgpre, exon 4 of 4)	216969464	216973936	4473	2	Mrgpre
Chr1	216970841	216971134	294	Exon (XM_006230870.3/Mrgpre, exon 4 of 4)	216969464	216973936	4473	2	Mrgpre
Chr1	217645405	217648666	3262	3' UTR	217644259	217720221	75963	2	Ppfia1
Chr1	217674947	217678051	3105	Exon (NM_001106320.2/Ppfia1, exon 10 of 26)	217644259	217720221	75963	2	Ppfia1
Chr1	217679912	217684769	4858	Exon (NM_001106320.2/Ppfia1, exon 6 of 26)	217644259	217720221	75963	2	Ppfia1
Chr1	217684868	217685590	723	Exon (NM_001106320.2/Ppfia1, exon 4 of 26)	217644259	217720221	75963	2	Ppfia1
Chr1	217746224	217746462	239	3' UTR	217746176	217748581	2406	2	Fadd
Chr1	217746557	217748533	1977	Exon (NM_152937.2/Fadd, exon 1 of 2)	217746176	217748581	2406	2	Fadd
Chr1	218007863	218008159	297	Exon (XR_001836064.1/LOC108349678, exon 3 of 3)	218007765	218020101	12337	2	LOC108349678
Chr1	218091750	218091950	201	3' UTR	218090750	218100272	9523	2	Ccnd1
Chr1	218419232	218419875	644	3' UTR	218419182	218448902	29721	2	Tpcn2
Chr1	218509373	218509571	199	3' UTR	218509274	218531922	22649	2	Ighmbp2
Chr1	218510110	218513451	3342	Exon (NM_031586.1/Ighmbp2, exon 13 of 15)	218509274	218531922	22649	2	Ighmbp2
Chr1	218695887	218696435	549	3' UTR	218695738	218810118	114381	2	Ppp6r3
Chr1	219406250	219407111	862	3' UTR	219406201	219412888	6688	2	Rps6kb2
Chr1	219413996	219418580	4585	3' UTR	219413897	219424034	10138	2	Carns1
Chr1	219443546	219444093	548	3' UTR	219439953	219443570	3618	1	Ppp1ca
Chr1	219520365	219520757	393	3' UTR	219520316	219532718	12403	2	Ankrd13d
Chr1	219566280	219566579	300	3' UTR	219566130	219640940	74811	2	Kdm2a
Chr1	219568576	219578961	10386	3' UTR	219566130	219640940	74811	2	Kdm2a
Chr1	219668797	219669095	299	3' UTR	219668352	219682287	13936	2	Rhod
Chr1	219690210	219693200	2991	3' UTR	219690013	219719359	29347	2	Syt12
Chr1	219743891	219744579	689	3' UTR	219743744	219758867	15124	2	LOC689065
Chr1	219758327	219758474	148	5' UTR	219743744	219758867	15124	2	LOC689065
Chr1	219850136	219850384	249	3' UTR	219850037	219853329	3293	2	Lrfn4
Chr1	219850781	219852597	1817	Exon (NM_001109508.1/Lrfn4, exon 2 of 3)	219850037	219853329	3293	2	Lrfn4
Chr1	219852895	219853044	150	5' UTR	219850037	219853329	3293	2	Lrfn4
Chr1	220042169	220048861	6693	5' UTR	220048740	220067120	18381	2	Rbm14
Chr1	220058997	220067025	8029	5' UTR	220048740	220067120	18381	2	Rbm14
Chr1	220089502	220095933	6432	Exon (NM_053425.1/Ccs, exon 2 of 8)	220075251	220096319	21069	2	Ccs
Chr1	220146383	220146681	299	3' UTR	220146084	220165545	19462	2	Bbs1
Chr1	220191308	220192693	1386	3' UTR	220191209	220201644	10436	2	Peli3
Chr1	220192841	220193187	347	3' UTR	220191209	220201644	10436	2	Peli3
Chr1	220194028	220196040	2013	Exon (XM_017589248.1/Peli3, exon 5 of 6)	220191209	220201644	10436	2	Peli3
Chr1	220260907	220261724	818	3' UTR	220260310	220278177	17868	2	Npas4
Chr1	220262470	220262867	398	Exon (XM_017588841.1/Npas4, exon 10 of 11)	220260310	220278177	17868	2	Npas4
Chr1	220481921	220482071	151	3' UTR	220480828	220491456	10629	2	LOC102555167
Chr1	220492323	220492719	397	3' UTR	220492174	220502084	9911	2	Klc2
Chr1	220646279	220646831	553	Exon (XM_008760105.2/Sf3b2, exon 19 of 20)	220645685	220665604	19920	2	Sf3b2
Chr1	220652498	220652736	239	Exon (XM_008760105.2/Sf3b2, exon 17 of 20)	220645685	220665604	19920	2	Sf3b2
Chr1	220653063	220658997	5935	Exon (XM_008760105.2/Sf3b2, exon 10 of 20)	220645685	220665604	19920	2	Sf3b2
Chr1	220762685	220764241	1557	Exon (NM_031596.1/Sart1, exon 14 of 19)	220762496	220771158	8663	2	Sart1
Chr1	220764545	220771059	6515	Exon (NM_031596.1/Sart1, exon 1 of 19)	220762496	220771158	8663	2	Sart1
Chr1	220803932	220804328	397	3' UTR	220803783	220806433	2651	2	Drap1
Chr1	220805718	220806480	763	5' UTR	220803783	220806433	2651	2	Drap1
Chr1	220862621	220863255	635	Exon (NM_001025645.1/Mus81, exon 14 of 16)	220862474	220867749	5276	2	Mus81
Chr1	220874469	220874813	345	3' UTR	220873782	220890800	17019	2	Snx32
Chr1	220927907	220928454	548	3' UTR	220927309	220933177	5869	2	Ovol1
Chr1	220967844	220968470	627	3' UTR	220967795	220974596	6802	2	Kat5
Chr1	221006404	221007130	727	3' UTR	221006305	221018820	12516	2	Sipa1
Chr1	221014566	221015374	809	Exon (XM_006230849.3/Sipa1, exon 2 of 16)	221006305	221018820	12516	2	Sipa1
Chr1	221015672	221018323	2652	5' UTR	221006539	221015800	9262	2	Sipa1
Chr1	221019141	221020200	1060	3' UTR	221019091	221041958	22868	2	Pcnx3
Chr1	221038756	221039155	400	Exon (XM_006230952.3/Pcnx3, exon 6 of 35)	221019091	221041958	22868	2	Pcnx3
Chr1	221039255	221039605	351	Exon (XM_006230952.3/Pcnx3, exon 6 of 35)	221019091	221041958	22868	2	Pcnx3
Chr1	221039704	221040520	817	Exon (XM_006230952.3/Pcnx3, exon 3 of 35)	221019091	221041958	22868	2	Pcnx3
Chr1	221066160	221076765	10606	Exon (NM_001025117.2/Ehbp1l1, exon 10 of 20)	221061878	221084391	22514	2	Ehbp1l1
Chr1	221077064	221077264	201	Exon (NM_001129997.1/Ehbp1l1, exon 9 of 20)	221061878	221084391	22514	2	Ehbp1l1
Chr1	221077613	221077912	300	Exon (NM_001270704.1/Ehbp1l1, exon 9 of 20)	221061878	221084391	22514	2	Ehbp1l1
Chr1	221089052	221089361	310	Exon (NM_001109537.2/Sssca1, exon 2 of 4)	221087803	221089586	1784	2	Sssca1
Chr1	221116090	221116850	761	3' UTR	221099155	221116090	16936	1	Ltbp3
Chr1	221213362	221213560	199	3' UTR	221213312	221233967	20656	2	Frmd8
Chr1	221214204	221214551	348	3' UTR	221213312	221233967	20656	2	Frmd8
Chr1	221248846	221249745	900	3' UTR	221248546	221251386	2841	2	Tigd3
Chr1	221249845	221250045	201	Exon (XM_006230805.3/Tigd3, exon 2 of 2)	221248546	221251386	2841	2	Tigd3
Chr1	221272449	221273793	1345	5' UTR	221272349	221281252	8904	2	Cdc42ep2
Chr1	221297713	221297860	148	3' UTR	221297417	221321459	24043	2	Pola2
Chr1	221417382	221420068	2687	Exon (NM_001047883.1/Mrpl49, exon 2 of 5)	221417336	221420115	2780	2	Mrpl49
Chr1	221444637	221445514	878	3' UTR	221443477	221445043	1567	1	Tmem262
Chr1	221504246	221516048	11803	3' UTR	221504150	221516191	12042	2	Arl2
Chr1	221726066	221726210	145	3' UTR	221725777	221735365	9589	2	LOC108349687
Chr1	222102535	222102833	299	3' UTR	222102436	222118485	16050	2	Ccdc88b
Chr1	222108646	222113529	4884	Exon (XM_215206.10/Ccdc88b, exon 14 of 27)	222102436	222118485	16050	2	Ccdc88b
Chr1	222113628	222113976	349	Exon (XM_215206.10/Ccdc88b, exon 14 of 27)	222102436	222118485	16050	2	Ccdc88b
Chr1	222168976	222170305	1330	3' UTR	222168729	222178725	9997	2	Esrra
Chr1	222179547	222182143	2597	3' UTR	222179451	222182716	3266	2	Tex40
Chr1	222183097	222183246	150	3' UTR	222182997	222192139	9143	2	Kcnk4
Chr1	222191092	222191441	350	5' UTR	222182997	222192139	9143	2	Kcnk4
Chr1	222208237	222208387	151	3' UTR	222207887	222224993	17107	2	Plcb3
Chr1	222209651	222210714	1064	Exon (XM_006230711.3/Plcb3, exon 26 of 32)	222207887	222224993	17107	2	Plcb3
Chr1	222232399	222234357	1959	5' UTR	222232349	222234401	2053	2	Fkbp2
Chr1	222237099	222239019	1921	3' UTR	222237000	222242786	5787	2	Vegfb
Chr1	222250391	222250904	514	5' UTR	222247500	222251053	3554	2	Nudt22
Chr1	222254283	222257419	3137	3' UTR	222254183	222272285	18103	2	Fermt3
Chr1	222345904	222346103	200	3' UTR	222340481	222360711	20231	2	Flrt1
Chr1	222346202	222346351	150	3' UTR	222340481	222360711	20231	2	Flrt1
Chr1	222347642	222347890	249	3' UTR	222340481	222360711	20231	2	Flrt1
Chr1	222347989	222348882	894	3' UTR	222340481	222360711	20231	2	Flrt1
Chr1	222348982	222349280	299	Exon (XM_008760167.2/Flrt1, exon 2 of 2)	222340481	222360711	20231	2	Flrt1
Chr1	222350024	222350173	150	Exon (XM_008760167.2/Flrt1, exon 2 of 2)	222344713	222350173	5461	2	Flrt1
Chr1	222479711	222480358	648	3' UTR	222478021	222495382	17362	2	Naa40
Chr1	222480696	222482176	1481	Exon (NM_001108518.1/Naa40, exon 5 of 8)	222478021	222495382	17362	2	Naa40
Chr1	222526793	222528285	1493	3' UTR	222525547	222546235	20689	2	Mark2
Chr1	224974308	224974455	148	5' UTR	224974238	224986819	12582	2	Taf6l
Chr1	224974699	224974993	295	5' UTR	224974238	224986819	12582	2	Taf6l
Chr1	224974287	224974583	297	5' UTR	224974238	224986819	12582	2	Taf6l
Chr1	224974681	224975211	531	5' UTR	224972220	224975091	2872	2	Tmem179b
Chr1	225005884	225010659	4776	3' UTR	225003859	225014807	10949	2	Ttc9c
Chr1	225014058	225014768	711	5' UTR	225005014	225014545	9532	2	Ttc9c
Chr1	225076399	225076981	583	3' UTR	225076301	225077079	779	2	Uqcc3
Chr1	225126782	225127324	543	3' UTR	225126732	225128740	2009	2	Rom1
Chr1	225309834	225316932	7099	Exon (NM_145089.4/Asrgl1, exon 3 of 7)	225184883	225429638	244756	1	Ahnak
Chr1	225906780	225906928	149	3' UTR	225906582	226152181	245600	2	Fads2
Chr1	226152370	226152568	199	5' UTR	225906797	226152568	245772	2	Fads2
Chr1	225926677	225937780	11104	Exon (XM_006231028.2/Incenp, exon 9 of 19)	225906582	226152181	245600	2	Fads2
Chr1	226251566	226255638	4073	5' UTR	226251516	226255630	4115	2	Fen1
[truncated: 16,027 more rows]
